# Supplementary material for: Dynamics in the Predictability of Credit Default Swap Spreads of EU Companies
Source: Hindawi journal article supplement (doi:10.1155/2023/7572061), 2023-12-23
Supplement: f1 [file 7572061.f1.pdf]

## A. The References to the Time Series of CDS Spreads

Table A1: The list of CDS spreads that were forecasted in this research.

| No | Company                                            | Country    | Refinitiv instrument code for CDS spreads |
|----|----------------------------------------------------|------------|-------------------------------------------|
| 1  | Accor SA                                           | France     | ACCP5YEUAM=R                              |
| 2  | Allianz SE                                         | Germany    | ALVG5YEUAM=R                              |
| 3  | Alstom SA                                          | France     | ALSO5YEUAM=R                              |
| 4  | ArcelorMittal SA                                   | Luxembourg | ISPJ5YEUAM=R                              |
| 5  | Atlantia SpA                                       | Italy      | AUTS5YEUAM=R                              |
| 6  | AXA SA                                             | France     | AXAF5YEUAM=R                              |
| 7  | Basf Se                                            | Germany    | BASF5YEUAM=R                              |
| 8  | Bayer AG                                           | Germany    | BAYG5YEUAM=R                              |
| 9  | Bayerische Motoren Werke AG                        | Germany    | BMWG5YEUAM=R                              |
| 10 | Bertelsmann SE & Co KGaA                           | Germany    | BTGG5YEUAM=R                              |
| 11 | BNP Paribas SA                                     | France     | BNPP5YEUAM=R                              |
| 12 | Bouygues SA                                        | France     | BOUY5YEUAM=R                              |
| 13 | Carlsberg Breweries A/S                            | Denmark    | CARA5YEUAM=R                              |
| 14 | Carrefour SA                                       | France     | CARR5YEUAM=R                              |
| 15 | Casino Guichard Perrachon SA                       | France     | CASP5YEUAM=R                              |
| 16 | Ceconomy AG                                        | Germany    | METB5YEUAM=R                              |
| 17 | Commerzbank AG                                     | Germany    | CBKG5YEUAM=R                              |
| 18 | Compagnie de Saint Gobain SA                       | France     | SGOB5YEUAM=R                              |
| 19 | Compagnie Generale des Etablissements Michelin SCA | France     | MICP5YEUAM=R                              |
| 20 | Continental AG                                     | Germany    | CONG5YEUAM=R                              |
| 21 | Credit Agricole Corporate and Investment Bank SA   | France     | CRIN5YEUAM=R                              |
| 22 | Credit Agricole SA                                 | France     | CAGR5YEUAM=R                              |
| 23 | Danone SA                                          | France     | DANO5YEUAM=R                              |
| 24 | Deutsche Bank AG                                   | Germany    | DB5YEUAM=R                                |
| 25 | Deutsche Lufthansa AG                              | Germany    | LHAG5YEUAM=R                              |
| 26 | Deutsche Post AG                                   | Germany    | DPWG5YEUAM=R                              |
| 27 | Deutsche Telekom AG                                | Germany    | DTA5YEUAM=R                               |
| 28 | E.ON SE                                            | Germany    | EONG5YEUAM=R                              |
| 29 | EDP Energias de Portugal SA                        | Portugal   | EDP5YEUAM=R                               |
| 30 | Electricite de France SA                           | France     | EDF5YEUAM=R                               |
| 31 | Electrolux AB                                      | Sweden     | ELEL5YEUAM=R                              |
| 32 | EnBW Energie Baden Wuerttemberg AG                 | Germany    | EBKG5YEUAM=R                              |
| 33 | Enel SpA                                           | Italy      | ENEI5YEUAM=R                              |
| 34 | Eni SpA                                            | Italy      | ENI5YEUAM=R                               |
| 35 | Equinor ASA                                        | Norway     | STL5YEUAM=R                               |
| 36 | Fortum Oyj                                         | Finland    | FUMC5YEUAM=R                              |
| 37 | Fresenius SE & Co KGaA                             | Germany    | FREG5YEUAM=R                              |
| 38 | Hannover Rueck SE                                  | Germany    | HNRG5YEUAM=R                              |
| 39 | HeidelbergCement AG                                | Germany    | HEIG5YEUAM=R                              |
| 40 | Hellenic Telecommunications Organization SA        | Greece     | OTE5YEUAM=R                               |
| 41 | Henkel AG & Co KGaA                                | Germany    | HNKG5YEUAM=R                              |
| 42 | Iberdrola SA                                       | Spain      | IBE5YEUAM=R                               |
| 43 | Iss A/S                                            | Denmark    | FSFN5YEUAM=R                              |
| 44 | Kering SA                                          | France     | P RTP5YEUAM=R                             |

|    |                                                                                  |            |              |
|----|----------------------------------------------------------------------------------|------------|--------------|
| 45 | Klepierre SA                                                                     | France     | LOIM5YEUAM=R |
| 46 | L'Air Liquide Societe Anonyme pour l'Etude et l'Exploitation des Procedes George | France     | AIRL5YEUAM=R |
| 47 | Lanxess AG                                                                       | Germany    | LXSG5YEUAM=R |
| 48 | Leonardo SpA                                                                     | Italy      | SIFI5YEUAM=R |
| 49 | LVMH Moet Hennessy Louis Vuitton SE                                              | France     | LVMH5YEUAM=R |
| 50 | Mediobanca Banca di Credito Finanziario SpA                                      | Italy      | MDBI5YEUAM=R |
| 51 | Melia Hotels International SA                                                    | Spain      | SOL5YEUAM=R  |
| 52 | Mercedes-Benz Group AG                                                           | Germany    | DCX5YEUAM=R  |
| 53 | Metsa Board Oyj                                                                  | Finland    | MRLB5YEUAM=R |
| 54 | Muenchener Rueckversicherungs Gesellschaft in Muenchen AG                        | Germany    | MUVG5YEUAM=R |
| 55 | Naturgy Energy Group SA                                                          | Spain      | GASX5YEUAM=R |
| 56 | Neles Oyj                                                                        | Finland    | MEOA5YEUAM=R |
| 57 | Nokia Oyj                                                                        | Finland    | NOKA5YEUAM=R |
| 58 | Orange SA                                                                        | France     | FTE5YEUAM=R  |
| 59 | Pernod Ricard SA                                                                 | France     | PERP5YEUAM=R |
| 60 | Publicis Groupe SA                                                               | France     | PUBP5YEUAM=R |
| 61 | Renault SA                                                                       | France     | RENA5YEUAM=R |
| 62 | Repsol SA                                                                        | Spain      | REP5YEUAM=R  |
| 63 | Sanofi SA                                                                        | France     | SASY5YEUAM=R |
| 64 | SES SA                                                                           | Luxembourg | SESF5YEUAM=R |
| 65 | Siemens AG                                                                       | Germany    | SIEG5YEUAM=R |
| 66 | Sociedad General de Aguas de Barcelona SA                                        | Spain      | AGSX5YEUAM=R |
| 67 | Societe Generale SA                                                              | France     | SG5YEUAM=R   |
| 68 | Sodexo SA                                                                        | France     | SODE5YEUAM=R |
| 69 | Solvay SA                                                                        | Belgium    | SOLB5YEUAM=R |
| 70 | Stena AB                                                                         | Sweden     | STEN5YEUAM=R |
| 71 | Stora Enso Oyj                                                                   | Finland    | STER5YEUAM=R |
| 72 | Suedzucker AG                                                                    | Germany    | SZUG5YEUAM=R |
| 73 | TDC Holding A/S                                                                  | Denmark    | TDC5YEUAM=R  |
| 74 | Telecom Italia SpA                                                               | Italy      | TLIT5YEUAM=R |
| 75 | Telefonaktiebolaget LM Ericsson                                                  | Sweden     | ERIC5YEUAM=R |
| 76 | Telefonica SA                                                                    | Spain      | TEF5YEUAM=R  |
| 77 | Telekom Austria AG                                                               | Austria    | TELA5YEUAM=R |
| 78 | Telenor ASA                                                                      | Norway     | TEL5YEUAM=R  |
| 79 | Telia Company AB                                                                 | Sweden     | TLSN5YEUAM=R |
| 80 | Thales SA                                                                        | France     | TCFP5YEUAM=R |
| 81 | ThyssenKrupp AG                                                                  | Germany    | TKAG5YEUAM=R |
| 82 | TUI AG                                                                           | Germany    | TUIG5YEUAM=R |
| 83 | UniCredit SpA                                                                    | Italy      | UNIC5YEUAM=R |
| 84 | UPM-Kymmene Oyj                                                                  | Finland    | UPMA5YEUAM=R |
| 85 | Valeo SE                                                                         | France     | VLOF5YEUAM=R |
| 86 | Veolia Environnement SA                                                          | France     | VIE5YEUAM=R  |
| 87 | Vinci SA                                                                         | France     | SGEF5YEUAM=R |
| 88 | Volkswagen AG                                                                    | Germany    | VOWG5YEUAM=R |
| 89 | Volvo AB                                                                         | Sweden     | VOLV5YEUAM=R |
| 90 | Wendel SE                                                                        | France     | WEND5YEUAM=R |

## B. The Relative RMSE Values for All Models

Table B1: The Relative RMSE of forecasting models for companies 1–15 listed in Table A1.

| Time period | 1    | 2    | 3    | 4    | 5    | 6    | 7    | 8    | 9    | 10   | 11   | 12   | 13   | 14   | 15   |
|-------------|------|------|------|------|------|------|------|------|------|------|------|------|------|------|------|
| 2010–2018   | 0.97 | 0.97 | 0.97 | 0.95 | 0.95 | 0.94 | 0.95 | 0.97 | 0.96 | 0.95 | 0.96 | 0.97 | 0.98 | 0.97 | 0.98 |
| Jan 2019    | 1.00 | 1.01 | 1.06 | 0.91 | 0.88 | 0.96 | 0.96 | 0.98 | 0.97 | 0.92 | 1.07 | 1.00 | 1.02 | 0.95 | 0.90 |
| Feb 2019    | 0.97 | 0.98 | 0.99 | 0.98 | 0.96 | 0.93 | 0.93 | 0.94 | 0.97 | 1.02 | 0.98 | 0.95 | 1.00 | 0.88 | 1.00 |
| Mar 2019    | 0.99 | 1.01 | 0.96 | 0.98 | 1.10 | 0.99 | 0.97 | 0.96 | 1.00 | 1.01 | 0.97 | 1.00 | 1.00 | 1.01 | 0.94 |
| Apr 2019    | 0.97 | 0.99 | 0.97 | 0.96 | 0.94 | 0.98 | 0.97 | 0.90 | 0.98 | 0.99 | 0.99 | 0.93 | 0.96 | 0.98 | 0.97 |
| May 2019    | 0.99 | 1.00 | 1.06 | 0.98 | 1.18 | 1.01 | 0.98 | 1.00 | 0.95 | 1.05 | 1.04 | 1.03 | 1.04 | 1.03 | 1.07 |
| Jun 2019    | 0.90 | 0.96 | 0.99 | 0.98 | 1.10 | 0.98 | 0.96 | 0.90 | 0.94 | 0.91 | 0.89 | 0.97 | 0.95 | 0.93 | 0.99 |
| Jul 2019    | 0.96 | 0.97 | 1.11 | 1.01 | 1.07 | 0.96 | 1.00 | 0.96 | 0.99 | 0.94 | 0.93 | 0.95 | 0.96 | 0.97 | 1.00 |
| Aug 2019    | 0.92 | 0.98 | 0.98 | 1.00 | 1.01 | 0.99 | 0.98 | 0.87 | 0.99 | 0.92 | 0.95 | 0.95 | 0.95 | 0.96 | 0.88 |
| Sep 2019    | 1.02 | 0.97 | 1.02 | 0.95 | 0.95 | 0.98 | 0.99 | 1.03 | 1.00 | 0.97 | 1.01 | 1.01 | 1.02 | 1.04 | 0.93 |
| Oct 2019    | 0.95 | 0.98 | 0.99 | 0.96 | 0.87 | 0.94 | 0.97 | 0.93 | 0.91 | 0.94 | 0.95 | 0.99 | 1.03 | 0.91 | 1.01 |
| Nov 2019    | 1.05 | 1.01 | 1.03 | 1.03 | 0.95 | 0.99 | 0.99 | 1.04 | 0.90 | 1.07 | 1.06 | 1.01 | 1.17 | 0.93 | 1.00 |
| Dec 2019    | 1.16 | 0.99 | 0.98 | 1.09 | 0.95 | 0.95 | 0.98 | 1.01 | 0.92 | 1.07 | 0.97 | 0.90 | 1.11 | 1.05 | 1.50 |
| Jan 2020    | 1.01 | 1.00 | 1.06 | 1.02 | 0.98 | 1.05 | 1.01 | 1.04 | 1.00 | 1.00 | 1.01 | 1.03 | 1.12 | 1.20 | 1.07 |
| Feb 2020    | 0.96 | 0.97 | 0.99 | 0.96 | 1.00 | 0.92 | 0.96 | 0.92 | 0.91 | 0.87 | 0.93 | 0.94 | 0.92 | 0.92 | 0.90 |
| Mar 2020*   | 1.03 | 0.91 | 0.97 | 0.83 | 0.89 | 0.82 | 0.93 | 0.83 | 0.80 | 0.86 | 0.89 | 0.90 | 0.85 | 1.02 | 1.11 |
| Mar 2020**  | 0.97 | 0.98 | 0.99 | 1.06 | 0.92 | 0.97 | 1.10 | 1.15 | 1.14 | 1.16 | 1.13 | 0.98 | 1.07 | 1.06 | 1.01 |
| Apr 2020    | 0.99 | 1.01 | 1.01 | 1.03 | 1.07 | 1.09 | 1.01 | 1.06 | 1.05 | 1.08 | 1.06 | 1.00 | 1.03 | 1.03 | 1.00 |
| May 2020    | 0.89 | 0.90 | 1.04 | 1.12 | 0.83 | 0.88 | 0.88 | 0.88 | 0.82 | 0.82 | 0.91 | 1.06 | 0.87 | 0.81 | 0.96 |
| Jun 2020    | 0.98 | 0.97 | 0.98 | 0.93 | 1.09 | 1.07 | 0.99 | 0.98 | 0.99 | 1.06 | 1.02 | 1.07 | 0.92 | 1.05 | 0.90 |
| Jul 2020    | 1.05 | 1.00 | 1.06 | 1.01 | 0.78 | 1.01 | 0.99 | 1.00 | 1.09 | 1.24 | 1.12 | 0.86 | 0.97 | 1.00 | 1.06 |
| Aug 2020    | 1.00 | 1.01 | 1.18 | 0.96 | 1.12 | 1.08 | 0.97 | 0.87 | 1.10 | 1.02 | 1.11 | 1.08 | 0.97 | 0.93 | 0.93 |
| Sep 2020    | 0.99 | 0.97 | 1.02 | 1.01 | 1.06 | 0.98 | 0.96 | 1.00 | 1.03 | 1.02 | 1.01 | 0.98 | 0.95 | 0.92 | 0.96 |
| Oct 2020    | 0.96 | 1.01 | 1.03 | 0.95 | 1.02 | 0.98 | 0.97 | 0.95 | 0.91 | 0.97 | 1.12 | 0.91 | 0.99 | 0.98 | 1.04 |
| Nov 2020    | 0.96 | 0.98 | 1.20 | 0.93 | 1.15 | 0.88 | 0.99 | 0.99 | 0.99 | 1.03 | 0.95 | 0.97 | 0.93 | 0.94 | 0.95 |
| Dec 2020    | 0.98 | 1.00 | 1.05 | 0.93 | 1.09 | 0.95 | 1.02 | 1.04 | 1.09 | 1.00 | 0.94 | 1.39 | 0.98 | 1.08 | 1.04 |
| Jan 2021    | 0.97 | 1.00 | 0.98 | 1.01 | 1.10 | 1.01 | 1.03 | 0.98 | 1.06 | 0.97 | 1.09 | 1.10 | 0.92 | 1.06 | 1.25 |
| Feb 2021    | 0.99 | 0.96 | 1.77 | 1.07 | 0.75 | 1.00 | 1.02 | 0.96 | 1.07 | 0.93 | 1.06 | 1.02 | 0.95 | 1.07 | 0.95 |
| Mar 2021    | 0.98 | 0.99 | 0.99 | 1.06 | 1.10 | 1.04 | 0.96 | 1.03 | 1.12 | 1.03 | 1.09 | 1.05 | 1.05 | 1.10 | 1.07 |
| Apr 2021    | 0.97 | 0.97 | 1.08 | 1.16 | 1.35 | 1.15 | 1.05 | 1.04 | 1.25 | 1.12 | 0.96 | 0.99 | 1.03 | 1.03 | 1.13 |
| May 2021    | 1.06 | 1.10 | 1.12 | 1.30 | 1.13 | 1.22 | 1.12 | 1.12 | 1.53 | 1.07 | 1.31 | 1.06 | 1.02 | 1.03 | 1.20 |
| Jun 2021    | 0.94 | 0.97 | 0.97 | 1.14 | 0.87 | 1.19 | 0.96 | 0.95 | 1.22 | 0.96 | 1.29 | 1.06 | 1.02 | 0.96 | 1.01 |
| Jul 2021    | 1.00 | 0.98 | 1.00 | 0.98 | 1.51 | 1.28 | 1.01 | 1.02 | 1.32 | 1.16 | 1.14 | 1.02 | 0.87 | 1.18 | 0.96 |
| Aug 2021    | 1.00 | 1.02 | 1.06 | 1.21 | 1.43 | 1.46 | 1.10 | 1.14 | 1.36 | 1.09 | 1.33 | 1.08 | 1.35 | 1.16 | 0.97 |
| Sep 2021    | 1.01 | 0.99 | 1.07 | 0.97 | 1.26 | 1.03 | 0.97 | 0.99 | 1.00 | 1.01 | 1.00 | 0.97 | 0.98 | 0.99 | 0.99 |
| Oct 2021    | 1.06 | 1.00 | 0.96 | 1.12 | 1.09 | 0.97 | 1.07 | 1.03 | 1.12 | 1.10 | 1.16 | 1.87 | 1.07 | 0.98 | 1.03 |
| Nov 2021    | 1.02 | 0.98 | 1.04 | 1.15 | 1.05 | 0.97 | 1.05 | 1.11 | 1.04 | 1.00 | 0.93 | 1.56 | 1.09 | 1.12 | 1.07 |
| Dec 2021    | 0.97 | 0.95 | 1.02 | 1.00 | 1.06 | 0.91 | 0.90 | 0.98 | 1.22 | 1.19 | 1.05 | 1.99 | 0.95 | 1.04 | 0.97 |
| Jan 2022    | 1.02 | 1.06 | 1.00 | 1.05 | 0.97 | 1.14 | 1.02 | 1.02 | 1.07 | 1.06 | 1.11 | 1.21 | 1.03 | 0.96 | 1.00 |
| Feb 2022    | 1.03 | 1.03 | 1.03 | 1.10 | 1.04 | 1.14 | 1.05 | 1.03 | 1.31 | 1.05 | 1.12 | 1.00 | 1.01 | 1.01 | 0.96 |

\*Before 11 March. \*\*Starting from 11 March.

Table B2: The Relative RMSE of forecasting models for companies 16–30 listed in Table A1.

| Time period | 16   | 17   | 18   | 19    | 20   | 21    | 22   | 23   | 24   | 25   | 26   | 27   | 28   | 29   | 30   |
|-------------|------|------|------|-------|------|-------|------|------|------|------|------|------|------|------|------|
| 2010–2018   | 0.98 | 0.95 | 0.96 | 0.97  | 0.94 | 0.96  | 0.95 | 0.99 | 0.97 | 0.97 | 0.97 | 0.94 | 0.95 | 0.95 | 0.94 |
| Jan 2019    | 1.00 | 0.97 | 0.97 | 1.00  | 0.98 | 1.07  | 1.02 | 0.98 | 1.03 | 0.99 | 1.04 | 0.94 | 0.97 | 1.00 | 0.98 |
| Feb 2019    | 1.05 | 0.95 | 0.92 | 0.85  | 0.96 | 0.96  | 0.95 | 0.97 | 0.97 | 0.93 | 0.95 | 0.96 | 0.97 | 1.00 | 0.93 |
| Mar 2019    | 1.00 | 0.98 | 0.99 | 1.02  | 1.01 | 0.97  | 0.96 | 1.01 | 0.94 | 0.98 | 0.98 | 1.00 | 1.00 | 0.93 | 0.95 |
| Apr 2019    | 0.95 | 0.99 | 0.93 | 1.00  | 0.94 | 0.99  | 1.01 | 0.98 | 0.99 | 0.97 | 1.25 | 0.96 | 0.94 | 1.01 | 0.95 |
| May 2019    | 1.17 | 1.00 | 1.00 | 0.99  | 1.01 | 0.99  | 1.02 | 1.03 | 1.02 | 0.98 | 1.03 | 1.01 | 1.07 | 1.26 | 1.03 |
| Jun 2019    | 1.01 | 0.95 | 0.93 | 0.96  | 0.90 | 0.93  | 0.93 | 0.92 | 0.96 | 0.96 | 0.98 | 0.94 | 0.88 | 1.02 | 0.85 |
| Jul 2019    | 0.99 | 0.97 | 0.99 | 0.97  | 0.94 | 0.96  | 0.93 | 0.96 | 0.96 | 1.03 | 1.00 | 0.92 | 0.95 | 0.93 | 0.93 |
| Aug 2019    | 0.97 | 1.00 | 0.94 | 0.99  | 0.94 | 0.98  | 1.02 | 0.95 | 1.00 | 1.07 | 0.95 | 0.97 | 0.96 | 0.95 | 0.97 |
| Sep 2019    | 1.02 | 1.01 | 1.01 | 1.00  | 0.99 | 0.98  | 1.00 | 1.00 | 1.00 | 0.99 | 1.00 | 1.00 | 1.02 | 1.04 | 0.99 |
| Oct 2019    | 0.94 | 0.99 | 0.97 | 0.93  | 1.06 | 0.94  | 0.95 | 1.01 | 1.00 | 0.99 | 0.99 | 0.96 | 0.98 | 1.30 | 0.97 |
| Nov 2019    | 0.99 | 0.95 | 0.90 | 1.34  | 1.00 | 1.01  | 0.98 | 1.02 | 1.01 | 0.93 | 1.10 | 1.01 | 1.00 | 0.94 | 1.04 |
| Dec 2019    | 0.98 | 0.94 | 1.18 | 1.06  | 0.88 | 1.01  | 0.97 | 1.02 | 0.91 | 1.01 | 0.99 | 0.93 | 0.97 | 1.32 | 0.94 |
| Jan 2020    | 1.02 | 1.02 | 1.05 | 5.46  | 0.98 | 1.02  | 1.08 | 1.02 | 1.01 | 1.01 | 1.03 | 1.04 | 1.06 | 1.28 | 0.95 |
| Feb 2020    | 0.95 | 0.89 | 0.95 | 0.95  | 0.92 | 0.99  | 0.92 | 0.97 | 0.90 | 0.90 | 0.97 | 0.90 | 0.88 | 0.84 | 0.90 |
| Mar 2020*   | 1.00 | 0.88 | 0.88 | 0.85  | 0.91 | 1.01  | 0.90 | 0.90 | 1.03 | 0.97 | 1.05 | 0.74 | 0.76 | 0.69 | 0.80 |
| Mar 2020**  | 0.97 | 1.18 | 1.11 | 1.01  | 1.03 | 1.12  | 1.09 | 1.00 | 1.15 | 0.94 | 1.07 | 1.20 | 1.21 | 1.46 | 1.16 |
| Apr 2020    | 1.03 | 1.08 | 1.03 | 0.98  | 0.97 | 1.07  | 1.13 | 1.02 | 1.03 | 1.02 | 1.07 | 1.02 | 1.07 | 1.25 | 1.06 |
| May 2020    | 0.95 | 0.86 | 0.86 | 0.92  | 0.84 | 1.19  | 1.01 | 0.92 | 0.93 | 0.98 | 1.03 | 0.91 | 0.95 | 0.82 | 0.90 |
| Jun 2020    | 0.92 | 1.11 | 0.90 | 0.98  | 0.96 | 1.05  | 1.08 | 1.02 | 1.08 | 1.06 | 0.97 | 1.05 | 1.13 | 1.19 | 0.99 |
| Jul 2020    | 1.00 | 1.17 | 0.99 | 0.94  | 0.97 | 1.18  | 1.18 | 1.01 | 1.16 | 1.12 | 0.98 | 1.14 | 1.05 | 1.16 | 0.90 |
| Aug 2020    | 0.92 | 1.03 | 0.89 | 0.97  | 0.93 | 1.12  | 1.23 | 1.01 | 1.05 | 0.99 | 1.01 | 1.10 | 1.09 | 1.30 | 0.94 |
| Sep 2020    | 0.91 | 1.01 | 0.99 | 1.00  | 0.95 | 0.99  | 1.02 | 0.96 | 1.02 | 0.97 | 1.01 | 1.01 | 1.00 | 1.06 | 0.99 |
| Oct 2020    | 0.98 | 0.99 | 0.97 | 0.99  | 0.94 | 1.15  | 1.03 | 1.01 | 0.98 | 1.05 | 1.02 | 1.00 | 0.99 | 1.22 | 0.94 |
| Nov 2020    | 0.85 | 0.89 | 0.91 | 0.99  | 0.96 | 0.90  | 0.95 | 1.00 | 0.89 | 1.07 | 1.00 | 1.01 | 1.02 | 1.08 | 0.92 |
| Dec 2020    | 1.07 | 1.02 | 0.95 | 12.10 | 0.98 | 0.94  | 1.00 | 0.97 | 0.99 | 0.98 | 0.97 | 0.95 | 1.04 | 1.19 | 0.91 |
| Jan 2021    | 0.98 | 1.11 | 0.91 | 0.88  | 0.96 | 1.01  | 1.08 | 0.92 | 1.11 | 0.98 | 0.98 | 0.88 | 1.12 | 1.12 | 1.00 |
| Feb 2021    | 1.02 | 1.04 | 1.08 | 1.00  | 0.92 | 1.02  | 0.95 | 1.02 | 0.94 | 1.16 | 0.93 | 1.03 | 1.03 | 1.05 | 0.88 |
| Mar 2021    | 1.03 | 1.06 | 0.97 | 1.03  | 1.02 | 1.12  | 1.09 | 1.01 | 1.06 | 0.96 | 1.00 | 1.09 | 1.06 | 1.27 | 1.04 |
| Apr 2021    | 1.20 | 1.15 | 1.02 | 1.22  | 1.10 | 0.97  | 1.05 | 0.98 | 1.07 | 1.02 | 1.00 | 1.26 | 1.03 | 1.37 | 0.97 |
| May 2021    | 1.14 | 1.49 | 1.18 | 1.22  | 1.08 | 1.33  | 1.33 | 1.01 | 1.35 | 1.30 | 1.11 | 1.13 | 1.13 | 1.83 | 1.11 |
| Jun 2021    | 0.92 | 1.17 | 0.92 | 1.15  | 0.88 | 1.27  | 1.27 | 1.02 | 1.28 | 1.05 | 0.97 | 1.42 | 1.07 | 1.83 | 1.01 |
| Jul 2021    | 0.98 | 1.48 | 0.97 | 0.93  | 1.00 | 16.80 | 1.08 | 0.94 | 1.95 | 1.02 | 1.00 | 1.38 | 1.22 | 2.26 | 0.99 |
| Aug 2021    | 1.36 | 1.33 | 1.40 | 1.41  | 1.11 | 2.10  | 1.84 | 0.96 | 2.08 | 1.12 | 0.93 | 0.95 | 1.26 | 1.79 | 1.01 |
| Sep 2021    | 0.99 | 0.99 | 0.96 | 1.01  | 1.01 | 1.02  | 1.06 | 0.97 | 1.00 | 1.02 | 0.97 | 0.98 | 1.00 | 1.07 | 0.99 |
| Oct 2021    | 1.21 | 1.47 | 1.03 | 1.22  | 1.01 | 1.22  | 1.05 | 1.05 | 1.07 | 0.94 | 0.94 | 1.16 | 1.11 | 1.43 | 0.99 |
| Nov 2021    | 0.99 | 1.09 | 1.10 | 1.32  | 0.95 | 2.44  | 1.05 | 1.04 | 1.06 | 0.97 | 0.97 | 1.03 | 1.06 | 1.15 | 1.11 |
| Dec 2021    | 1.01 | 0.97 | 1.01 | 1.09  | 0.93 | 1.04  | 0.98 | 0.97 | 0.90 | 1.01 | 1.17 | 1.20 | 0.98 | 1.17 | 1.00 |
| Jan 2022    | 1.01 | 1.24 | 0.96 | 1.00  | 0.99 | 1.28  | 1.23 | 1.01 | 1.21 | 1.03 | 1.02 | 1.23 | 1.09 | 1.40 | 0.99 |
| Feb 2022    | 1.06 | 1.33 | 1.09 | 0.96  | 1.08 | 1.23  | 1.23 | 1.01 | 1.28 | 1.23 | 0.96 | 1.17 | 1.14 | 1.39 | 0.99 |

\*Before 11 March. \*\*Starting from 11 March.

Table B3: The Relative RMSE of forecasting models for companies 31–45 listed in Table A1.

| Time period | 31   | 32   | 33   | 34   | 35   | 36   | 37   | 38   | 39   | 40   | 41   | 42   | 43   | 44   | 45    |
|-------------|------|------|------|------|------|------|------|------|------|------|------|------|------|------|-------|
| 2010–2018   | 0.98 | 0.96 | 0.95 | 0.94 | 0.94 | 0.95 | 0.96 | 0.98 | 0.95 | 0.96 | 0.98 | 0.95 | 0.99 | 0.98 | 0.99  |
| Jan 2019    | 0.96 | 0.97 | 1.00 | 0.99 | 0.91 | 0.98 | 1.11 | 0.97 | 0.95 | 1.06 | 1.00 | 1.00 | 1.05 | 0.96 | 0.94  |
| Feb 2019    | 0.95 | 1.01 | 0.90 | 0.95 | 0.95 | 0.98 | 0.98 | 0.96 | 0.92 | 0.93 | 0.97 | 0.95 | 1.05 | 0.92 | 1.11  |
| Mar 2019    | 1.02 | 1.00 | 0.99 | 1.01 | 1.00 | 1.00 | 1.00 | 1.00 | 1.00 | 1.06 | 1.00 | 0.99 | 1.06 | 1.01 | 1.02  |
| Apr 2019    | 0.99 | 1.01 | 0.94 | 0.99 | 0.96 | 0.94 | 1.03 | 0.98 | 0.91 | 1.01 | 1.00 | 0.96 | 1.01 | 0.96 | 5.12  |
| May 2019    | 1.04 | 1.04 | 0.95 | 1.00 | 1.03 | 0.99 | 1.08 | 1.00 | 1.01 | 1.02 | 1.01 | 1.00 | 1.05 | 1.00 | 1.03  |
| Jun 2019    | 0.89 | 0.94 | 0.89 | 0.98 | 1.09 | 0.88 | 0.88 | 0.98 | 0.90 | 0.95 | 0.96 | 0.88 | 0.95 | 0.87 | 1.01  |
| Jul 2019    | 0.94 | 1.02 | 0.94 | 0.97 | 0.97 | 0.93 | 0.95 | 0.96 | 0.98 | 0.93 | 0.97 | 0.96 | 1.02 | 0.96 | 1.02  |
| Aug 2019    | 0.95 | 0.97 | 0.91 | 1.00 | 0.96 | 0.98 | 0.97 | 0.99 | 0.89 | 0.98 | 0.94 | 0.97 | 1.10 | 0.96 | 0.89  |
| Sep 2019    | 1.02 | 1.02 | 1.03 | 0.94 | 1.03 | 1.02 | 1.00 | 0.97 | 1.01 | 1.02 | 1.00 | 1.00 | 1.13 | 1.01 | 1.02  |
| Oct 2019    | 1.03 | 0.92 | 0.98 | 0.98 | 0.90 | 1.05 | 0.99 | 0.95 | 0.98 | 0.91 | 0.95 | 1.02 | 1.00 | 0.96 | 0.97  |
| Nov 2019    | 0.99 | 1.01 | 1.01 | 1.01 | 1.03 | 1.07 | 1.00 | 1.01 | 1.03 | 1.08 | 1.02 | 1.08 | 1.06 | 1.01 | 1.03  |
| Dec 2019    | 1.03 | 0.98 | 1.06 | 1.11 | 1.04 | 1.03 | 0.95 | 0.96 | 0.99 | 1.00 | 1.08 | 1.21 | 1.09 | 0.95 | 1.00  |
| Jan 2020    | 1.07 | 1.08 | 1.05 | 1.06 | 1.03 | 1.03 | 1.06 | 1.01 | 1.02 | 1.08 | 1.00 | 1.07 | 1.11 | 1.01 | 1.06  |
| Feb 2020    | 0.94 | 0.87 | 0.84 | 0.89 | 0.89 | 0.87 | 0.94 | 0.97 | 0.93 | 0.90 | 0.97 | 0.88 | 1.04 | 0.97 | 1.01  |
| Mar 2020*   | 0.91 | 0.72 | 0.79 | 0.90 | 0.92 | 0.80 | 0.78 | 0.96 | 0.85 | 0.89 | 1.03 | 0.78 | 0.99 | 0.87 | 1.00  |
| Mar 2020**  | 1.06 | 0.90 | 0.89 | 1.17 | 1.11 | 1.13 | 1.09 | 0.99 | 1.16 | 1.15 | 1.02 | 1.26 | 1.01 | 1.00 | 0.99  |
| Apr 2020    | 1.03 | 1.06 | 1.04 | 1.02 | 0.95 | 1.02 | 1.27 | 1.04 | 1.05 | 1.09 | 1.01 | 1.06 | 0.96 | 1.04 | 1.02  |
| May 2020    | 0.91 | 0.86 | 1.22 | 0.92 | 0.97 | 0.94 | 1.30 | 0.87 | 0.88 | 0.79 | 0.96 | 0.99 | 0.94 | 0.89 | 0.95  |
| Jun 2020    | 0.94 | 1.07 | 1.16 | 0.94 | 0.94 | 1.01 | 0.96 | 1.02 | 0.94 | 0.96 | 1.03 | 1.13 | 1.00 | 0.97 | 0.89  |
| Jul 2020    | 0.95 | 1.14 | 1.18 | 0.95 | 0.94 | 0.92 | 1.01 | 0.99 | 0.98 | 1.06 | 0.99 | 1.02 | 1.01 | 0.98 | 1.02  |
| Aug 2020    | 0.98 | 1.17 | 1.70 | 0.89 | 0.88 | 1.05 | 0.95 | 1.02 | 0.94 | 0.98 | 1.01 | 1.22 | 1.06 | 0.96 | 1.50  |
| Sep 2020    | 0.95 | 1.02 | 1.04 | 0.96 | 0.99 | 0.97 | 0.98 | 0.96 | 0.94 | 1.00 | 0.97 | 1.04 | 1.00 | 0.99 | 0.98  |
| Oct 2020    | 0.99 | 1.01 | 1.04 | 1.03 | 1.01 | 1.00 | 1.03 | 1.00 | 0.96 | 1.16 | 0.98 | 1.14 | 1.00 | 0.98 | 0.90  |
| Nov 2020    | 0.95 | 1.00 | 1.01 | 0.93 | 0.96 | 0.91 | 0.65 | 0.97 | 0.91 | 1.01 | 0.95 | 0.99 | 0.99 | 0.92 | 0.94  |
| Dec 2020    | 0.96 | 1.00 | 1.12 | 1.06 | 1.08 | 1.06 | 0.94 | 0.98 | 1.07 | 1.14 | 0.97 | 1.09 | 1.00 | 0.94 | 1.08  |
| Jan 2021    | 0.96 | 0.99 | 1.29 | 0.98 | 1.04 | 0.99 | 1.14 | 1.04 | 0.89 | 0.90 | 0.97 | 1.33 | 0.96 | 0.87 | 1.19  |
| Feb 2021    | 0.91 | 1.02 | 1.04 | 0.97 | 0.86 | 0.98 | 1.09 | 0.99 | 1.38 | 0.96 | 1.01 | 1.01 | 1.05 | 0.99 | 1.01  |
| Mar 2021    | 1.04 | 1.09 | 1.15 | 1.03 | 1.03 | 1.02 | 1.01 | 0.97 | 1.09 | 0.99 | 1.01 | 1.12 | 0.97 | 1.02 | 1.17  |
| Apr 2021    | 1.01 | 1.17 | 1.47 | 1.06 | 1.06 | 1.04 | 1.04 | 1.04 | 0.98 | 1.11 | 1.00 | 1.27 | 1.06 | 1.03 | 1.02  |
| May 2021    | 1.05 | 1.21 | 1.32 | 1.04 | 0.95 | 1.04 | 1.22 | 1.04 | 1.46 | 1.26 | 1.16 | 1.75 | 0.99 | 0.97 | 32.43 |
| Jun 2021    | 0.98 | 1.17 | 1.28 | 0.87 | 0.92 | 1.04 | 1.11 | 1.01 | 1.24 | 1.27 | 0.99 | 1.19 | 1.05 | 1.08 | 23.34 |
| Jul 2021    | 0.96 | 0.96 | 1.10 | 0.99 | 1.15 | 0.98 | 1.10 | 1.05 | 1.13 | 1.47 | 0.94 | 1.23 | 1.00 | 0.89 | 57.62 |
| Aug 2021    | 1.00 | 1.11 | 1.59 | 1.29 | 1.56 | 1.07 | 1.23 | 1.10 | 1.87 | 1.29 | 1.00 | 1.32 | 0.97 | 1.00 | 1.23  |
| Sep 2021    | 0.99 | 0.99 | 1.01 | 0.99 | 0.94 | 0.99 | 1.00 | 1.00 | 0.97 | 1.06 | 0.99 | 1.02 | 1.00 | 0.98 | 0.99  |
| Oct 2021    | 1.15 | 1.18 | 1.12 | 0.98 | 1.12 | 1.04 | 1.15 | 1.05 | 1.01 | 1.09 | 0.96 | 0.99 | 0.99 | 1.05 | 1.00  |
| Nov 2021    | 1.02 | 1.02 | 1.07 | 1.05 | 1.08 | 1.13 | 0.90 | 1.01 | 1.09 | 1.07 | 1.02 | 1.01 | 1.04 | 1.07 | 1.05  |
| Dec 2021    | 1.05 | 0.90 | 1.06 | 0.99 | 1.00 | 1.02 | 0.80 | 0.92 | 1.04 | 1.19 | 0.98 | 1.13 | 1.00 | 1.07 | 1.21  |
| Jan 2022    | 0.97 | 1.11 | 1.29 | 1.03 | 0.98 | 1.00 | 1.43 | 1.07 | 0.98 | 1.25 | 0.99 | 1.17 | 0.99 | 0.99 | 0.96  |
| Feb 2022    | 1.00 | 1.14 | 1.41 | 1.04 | 0.99 | 1.02 | 1.16 | 1.06 | 1.06 | 1.08 | 1.02 | 1.21 | 0.95 | 1.01 | 0.96  |

\*Before 11 March. \*\*Starting from 11 March.

Table B4: The Relative RMSE of forecasting models for companies 46–60 listed in Table A1.

| Time period | 46   | 47   | 48   | 49   | 50   | 51   | 52   | 53   | 54   | 55   | 56    | 57   | 58   | 59   | 60   |
|-------------|------|------|------|------|------|------|------|------|------|------|-------|------|------|------|------|
| 2010–2018   | 0.99 | 0.95 | 0.94 | 0.97 | 0.98 | 0.97 | 0.96 | 0.98 | 0.98 | 0.95 | 0.96  | 0.94 | 0.95 | 0.97 | 0.94 |
| Jan 2019    | 1.00 | 0.95 | 1.06 | 0.97 | 1.07 | 2.51 | 0.96 | 0.96 | 0.99 | 0.98 | 0.94  | 0.95 | 0.94 | 0.97 | 0.91 |
| Feb 2019    | 0.99 | 0.91 | 0.99 | 0.95 | 0.97 | 0.91 | 0.96 | 0.92 | 1.02 | 0.90 | 0.95  | 0.98 | 0.99 | 0.95 | 1.02 |
| Mar 2019    | 0.98 | 1.00 | 1.01 | 1.00 | 0.99 | 0.99 | 1.01 | 0.95 | 1.01 | 1.01 | 1.02  | 1.02 | 1.01 | 1.01 | 1.00 |
| Apr 2019    | 0.99 | 0.97 | 1.00 | 0.91 | 0.97 | 0.95 | 0.95 | 0.91 | 0.99 | 0.95 | 1.74  | 1.06 | 0.98 | 0.98 | 1.02 |
| May 2019    | 1.00 | 1.00 | 1.01 | 1.03 | 0.96 | 1.78 | 0.99 | 1.02 | 1.02 | 0.99 | 1.20  | 1.03 | 1.05 | 1.05 | 1.06 |
| Jun 2019    | 0.96 | 0.99 | 0.94 | 1.01 | 0.96 | 0.98 | 0.95 | 0.96 | 0.98 | 0.82 | 0.90  | 1.02 | 0.93 | 0.93 | 0.91 |
| Jul 2019    | 0.99 | 1.00 | 0.98 | 0.97 | 0.97 | 1.07 | 0.96 | 0.97 | 0.99 | 0.98 | 1.23  | 0.97 | 0.97 | 0.98 | 0.87 |
| Aug 2019    | 0.95 | 0.93 | 0.98 | 0.98 | 0.92 | 0.98 | 1.00 | 0.91 | 0.98 | 0.97 | 1.04  | 0.99 | 0.96 | 0.93 | 0.89 |
| Sep 2019    | 1.00 | 1.02 | 0.97 | 0.99 | 0.98 | 1.03 | 1.01 | 1.01 | 1.00 | 0.98 | 1.02  | 1.03 | 0.98 | 1.03 | 1.02 |
| Oct 2019    | 0.96 | 0.97 | 1.03 | 1.00 | 1.03 | 1.26 | 0.94 | 0.99 | 1.01 | 0.96 | 1.23  | 1.05 | 0.98 | 1.04 | 1.01 |
| Nov 2019    | 0.97 | 0.98 | 0.98 | 0.98 | 1.04 | 1.63 | 0.95 | 0.98 | 1.01 | 0.95 | 1.30  | 1.08 | 1.02 | 1.01 | 1.01 |
| Dec 2019    | 0.97 | 0.91 | 1.06 | 1.00 | 1.01 | 1.03 | 1.04 | 0.96 | 1.01 | 1.07 | 1.19  | 0.98 | 1.02 | 1.18 | 0.85 |
| Jan 2020    | 1.03 | 1.03 | 1.15 | 1.06 | 0.98 | 1.12 | 0.96 | 0.99 | 0.98 | 1.05 | 1.40  | 0.94 | 0.98 | 1.11 | 1.03 |
| Feb 2020    | 0.95 | 0.93 | 0.84 | 0.91 | 0.95 | 1.48 | 0.87 | 0.86 | 0.98 | 0.88 | 1.32  | 0.89 | 0.86 | 0.95 | 0.89 |
| Mar 2020*   | 0.92 | 1.06 | 0.90 | 0.91 | 0.78 | 1.55 | 1.04 | 0.90 | 0.98 | 0.73 | 2.21  | 0.84 | 1.13 | 1.05 | 1.03 |
| Mar 2020**  | 1.02 | 1.01 | 0.87 | 1.03 | 1.11 | 1.49 | 1.16 | 1.05 | 0.98 | 1.15 | 1.16  | 1.12 | 1.19 | 1.03 | 1.12 |
| Apr 2020    | 0.99 | 1.04 | 0.99 | 1.00 | 1.01 | 1.27 | 1.01 | 0.95 | 1.02 | 1.09 | 2.44  | 1.02 | 0.99 | 1.00 | 0.99 |
| May 2020    | 0.94 | 0.88 | 0.84 | 0.87 | 0.85 | 1.11 | 0.84 | 0.90 | 0.92 | 1.05 | 3.69  | 0.88 | 1.01 | 0.85 | 0.87 |
| Jun 2020    | 1.00 | 0.92 | 0.89 | 1.02 | 1.00 | 1.49 | 1.01 | 0.97 | 0.97 | 1.12 | 15.22 | 1.00 | 1.03 | 0.92 | 0.91 |
| Jul 2020    | 1.01 | 1.02 | 1.00 | 1.03 | 1.07 | 0.99 | 1.10 | 0.95 | 1.01 | 1.13 | 2.75  | 1.02 | 1.20 | 1.00 | 1.01 |
| Aug 2020    | 0.95 | 0.88 | 1.11 | 0.94 | 1.00 | 0.99 | 1.02 | 1.02 | 1.03 | 1.09 | 3.10  | 1.03 | 1.19 | 1.07 | 0.91 |
| Sep 2020    | 0.99 | 1.01 | 0.95 | 0.96 | 0.99 | 0.95 | 1.03 | 1.01 | 1.00 | 1.02 | 1.02  | 1.00 | 1.00 | 0.96 | 0.97 |
| Oct 2020    | 1.00 | 0.95 | 0.94 | 0.98 | 0.98 | 1.54 | 0.96 | 0.99 | 0.99 | 1.06 | 10.43 | 0.86 | 1.03 | 1.01 | 0.98 |
| Nov 2020    | 0.97 | 1.03 | 0.99 | 1.01 | 0.97 | 1.37 | 0.96 | 0.99 | 0.99 | 1.02 | 1.21  | 0.98 | 1.02 | 0.95 | 0.95 |
| Dec 2020    | 1.01 | 1.03 | 1.01 | 1.03 | 0.93 | 1.00 | 1.20 | 1.03 | 1.02 | 0.96 | 1.59  | 0.99 | 0.98 | 1.05 | 1.01 |
| Jan 2021    | 1.00 | 0.93 | 0.96 | 1.00 | 1.06 | 1.12 | 1.19 | 1.01 | 1.04 | 1.18 | 2.18  | 1.14 | 0.97 | 0.98 | 1.02 |
| Feb 2021    | 1.01 | 0.98 | 1.14 | 0.96 | 1.03 | 2.15 | 1.05 | 0.96 | 0.98 | 1.01 | 1.90  | 1.00 | 1.02 | 0.97 | 1.04 |
| Mar 2021    | 1.00 | 0.98 | 0.97 | 1.03 | 1.03 | 0.99 | 1.12 | 1.04 | 1.00 | 1.11 | 0.93  | 1.07 | 1.10 | 1.03 | 0.98 |
| Apr 2021    | 1.01 | 1.07 | 1.16 | 1.06 | 0.98 | 1.24 | 1.31 | 1.03 | 1.04 | 1.19 | 1.71  | 0.94 | 1.25 | 1.01 | 1.04 |
| May 2021    | 1.01 | 1.13 | 1.12 | 1.00 | 1.68 | 1.48 | 2.25 | 1.08 | 1.03 | 1.39 | 11.95 | 1.08 | 1.06 | 1.03 | 1.05 |
| Jun 2021    | 1.00 | 0.98 | 0.99 | 0.98 | 1.01 | 1.13 | 1.25 | 1.03 | 1.01 | 1.15 | 1.60  | 1.03 | 1.26 | 1.05 | 0.92 |
| Jul 2021    | 1.04 | 0.97 | 1.00 | 0.98 | 1.12 | 0.93 | 1.80 | 1.15 | 1.06 | 1.44 | 2.16  | 1.04 | 1.30 | 0.93 | 1.00 |
| Aug 2021    | 3.55 | 1.25 | 1.18 | 1.02 | 1.67 | 1.21 | 2.07 | 1.24 | 1.02 | 2.20 | 1.01  | 1.07 | 0.96 | 1.02 | 1.05 |
| Sep 2021    | 0.99 | 0.98 | 1.03 | 1.01 | 0.98 | 1.01 | 1.02 | 0.98 | 1.01 | 1.02 | 0.98  | 0.96 | 0.99 | 0.99 | 0.97 |
| Oct 2021    | 1.00 | 0.99 | 1.16 | 1.06 | 1.19 | 1.00 | 1.20 | 1.06 | 1.03 | 0.95 | 8.76  | 1.08 | 1.04 | 1.06 | 1.09 |
| Nov 2021    | 1.05 | 1.21 | 1.04 | 1.22 | 0.87 | 1.03 | 1.24 | 1.13 | 1.02 | 1.00 | 2.90  | 1.03 | 1.05 | 1.12 | 1.02 |
| Dec 2021    | 1.00 | 0.91 | 1.08 | 1.00 | 1.02 | 1.00 | 1.52 | 1.00 | 0.96 | 1.12 | 1.17  | 1.14 | 1.04 | 0.97 | 1.02 |
| Jan 2022    | 1.00 | 1.06 | 1.00 | 1.08 | 1.17 | 0.99 | 1.07 | 1.12 | 1.11 | 1.18 | 0.84  | 1.02 | 1.15 | 1.01 | 1.02 |
| Feb 2022    | 1.04 | 1.07 | 0.97 | 1.02 | 1.21 | 1.01 | 1.34 | 1.09 | 1.07 | 1.21 | 1.07  | 0.97 | 1.13 | 1.00 | 1.03 |

\*Before 11 March. \*\*Starting from 11 March.

Table B5: The Relative RMSE of forecasting models for companies 61–75 listed in Table A1.

| Time period | 61   | 62   | 63   | 64   | 65   | 66   | 67   | 68   | 69   | 70   | 71   | 72   | 73   | 74   | 75   |
|-------------|------|------|------|------|------|------|------|------|------|------|------|------|------|------|------|
| 2010–2018   | 0.95 | 0.96 | 0.99 | 0.98 | 0.95 | 1.00 | 0.94 | 0.97 | 0.95 | 0.94 | 0.95 | 0.99 | 0.98 | 0.95 | 0.97 |
| Jan 2019    | 0.96 | 0.99 | 0.99 | 0.99 | 1.01 | 1.09 | 1.07 | 1.04 | 0.98 | 1.04 | 0.93 | 0.96 | 0.92 | 1.01 | 1.01 |
| Feb 2019    | 0.92 | 0.97 | 0.99 | 1.00 | 0.91 | 1.05 | 0.95 | 0.97 | 0.96 | 0.90 | 0.94 | 0.95 | 0.98 | 0.89 | 0.93 |
| Mar 2019    | 0.98 | 1.00 | 0.99 | 0.98 | 1.01 | 0.96 | 0.96 | 1.01 | 1.01 | 1.00 | 0.94 | 1.01 | 0.97 | 1.02 | 1.05 |
| Apr 2019    | 0.97 | 0.92 | 0.99 | 0.96 | 1.00 | 1.02 | 0.98 | 0.97 | 0.95 | 0.95 | 0.83 | 1.01 | 1.03 | 0.95 | 1.00 |
| May 2019    | 1.03 | 1.03 | 1.01 | 1.03 | 1.22 | 0.99 | 1.03 | 0.94 | 1.00 | 1.12 | 1.02 | 0.99 | 0.97 | 1.03 | 1.22 |
| Jun 2019    | 0.97 | 1.03 | 0.99 | 0.99 | 0.95 | 1.04 | 0.91 | 1.00 | 0.94 | 0.92 | 0.97 | 0.96 | 1.03 | 0.90 | 0.91 |
| Jul 2019    | 0.98 | 1.02 | 1.02 | 1.06 | 0.92 | 1.09 | 0.92 | 1.07 | 0.98 | 0.90 | 0.90 | 0.99 | 1.01 | 0.93 | 0.91 |
| Aug 2019    | 0.99 | 1.00 | 0.97 | 0.99 | 0.97 | 1.04 | 0.96 | 1.05 | 0.94 | 0.94 | 0.88 | 0.96 | 1.04 | 0.96 | 0.93 |
| Sep 2019    | 0.99 | 1.03 | 1.02 | 1.01 | 1.01 | 1.03 | 1.00 | 1.04 | 1.01 | 0.97 | 1.01 | 1.00 | 0.99 | 0.97 | 1.01 |
| Oct 2019    | 1.03 | 1.02 | 0.97 | 0.95 | 0.98 | 1.05 | 0.96 | 1.02 | 1.00 | 0.90 | 0.99 | 1.07 | 0.96 | 1.01 | 0.97 |
| Nov 2019    | 0.92 | 1.01 | 1.00 | 0.95 | 0.99 | 1.13 | 1.05 | 0.91 | 1.07 | 0.99 | 1.02 | 1.12 | 0.96 | 1.06 | 1.08 |
| Dec 2019    | 0.86 | 1.08 | 0.99 | 0.92 | 1.06 | 0.99 | 0.95 | 1.01 | 0.98 | 1.02 | 1.09 | 1.02 | 1.05 | 0.93 | 1.53 |
| Jan 2020    | 0.99 | 0.98 | 1.02 | 1.00 | 1.03 | 1.00 | 1.03 | 1.00 | 1.10 | 0.98 | 1.05 | 1.10 | 0.95 | 1.04 | 0.95 |
| Feb 2020    | 0.84 | 0.85 | 0.98 | 0.96 | 0.92 | 1.12 | 0.92 | 1.03 | 0.93 | 0.86 | 0.86 | 0.94 | 0.94 | 0.86 | 0.85 |
| Mar 2020*   | 1.11 | 0.82 | 0.91 | 1.01 | 0.86 | 1.03 | 0.84 | 1.05 | 0.77 | 0.84 | 0.78 | 1.00 | 0.99 | 0.83 | 1.02 |
| Mar 2020**  | 1.24 | 1.22 | 1.04 | 1.05 | 1.08 | 1.04 | 1.27 | 0.99 | 1.08 | 1.12 | 1.21 | 1.14 | 1.04 | 1.14 | 1.13 |
| Apr 2020    | 1.04 | 1.08 | 1.01 | 1.05 | 1.05 | 1.04 | 1.17 | 1.15 | 1.06 | 1.05 | 0.93 | 1.02 | 1.03 | 0.98 | 1.04 |
| May 2020    | 0.99 | 1.09 | 1.00 | 0.94 | 0.93 | 1.04 | 0.93 | 0.95 | 0.88 | 0.87 | 0.90 | 1.03 | 0.96 | 1.12 | 0.96 |
| Jun 2020    | 1.03 | 1.05 | 1.03 | 0.98 | 0.98 | 1.01 | 1.07 | 1.01 | 0.97 | 0.95 | 1.03 | 1.06 | 0.95 | 0.99 | 1.00 |
| Jul 2020    | 1.11 | 1.10 | 1.00 | 0.98 | 0.96 | 1.04 | 1.27 | 1.05 | 1.00 | 1.06 | 1.11 | 1.05 | 1.00 | 1.17 | 0.92 |
| Aug 2020    | 1.33 | 1.00 | 0.99 | 0.96 | 0.94 | 1.03 | 1.10 | 1.05 | 0.92 | 1.07 | 1.12 | 1.10 | 0.96 | 1.05 | 0.97 |
| Sep 2020    | 0.99 | 0.97 | 0.98 | 0.97 | 0.96 | 0.97 | 1.03 | 0.96 | 0.98 | 0.98 | 1.00 | 1.03 | 0.99 | 1.05 | 1.00 |
| Oct 2020    | 0.96 | 1.05 | 1.01 | 1.00 | 0.98 | 1.01 | 1.17 | 0.97 | 0.96 | 1.06 | 1.06 | 0.97 | 0.95 | 0.95 | 0.99 |
| Nov 2020    | 0.94 | 1.08 | 0.99 | 0.93 | 0.95 | 1.03 | 0.98 | 1.12 | 1.01 | 1.04 | 1.07 | 0.97 | 0.94 | 0.98 | 0.94 |
| Dec 2020    | 1.04 | 1.13 | 1.01 | 1.04 | 0.99 | 1.03 | 0.93 | 1.08 | 1.04 | 1.02 | 1.37 | 1.00 | 1.06 | 1.01 | 0.99 |
| Jan 2021    | 0.96 | 1.02 | 0.97 | 1.02 | 1.05 | 0.98 | 1.28 | 1.27 | 0.93 | 0.91 | 0.97 | 1.04 | 1.00 | 1.17 | 1.00 |
| Feb 2021    | 0.95 | 1.25 | 1.01 | 1.00 | 0.92 | 1.03 | 0.94 | 1.05 | 1.12 | 1.02 | 1.13 | 1.02 | 0.99 | 0.98 | 0.93 |
| Mar 2021    | 1.16 | 1.16 | 1.01 | 1.01 | 0.99 | 0.97 | 1.10 | 1.06 | 1.03 | 1.05 | 1.07 | 1.04 | 1.04 | 1.00 | 0.99 |
| Apr 2021    | 1.41 | 1.20 | 0.99 | 1.03 | 0.98 | 1.03 | 0.99 | 1.02 | 1.04 | 1.09 | 1.29 | 1.15 | 0.98 | 1.11 | 1.00 |
| May 2021    | 1.40 | 1.73 | 1.02 | 1.04 | 1.07 | 1.02 | 1.48 | 1.31 | 1.05 | 1.09 | 1.60 | 1.34 | 1.08 | 1.25 | 1.21 |
| Jun 2021    | 1.14 | 1.45 | 1.01 | 0.96 | 0.98 | 0.96 | 1.43 | 1.15 | 0.94 | 1.21 | 1.10 | 1.10 | 1.04 | 1.18 | 0.96 |
| Jul 2021    | 1.24 | 1.60 | 1.00 | 1.14 | 0.99 | 1.03 | 1.29 | 1.13 | 0.92 | 1.01 | 1.15 | 0.97 | 0.99 | 1.13 | 0.86 |
| Aug 2021    | 1.19 | 3.02 | 1.02 | 1.01 | 0.99 | 1.05 | 1.75 | 1.11 | 1.13 | 1.03 | 1.37 | 1.39 | 1.07 | 1.64 | 1.13 |
| Sep 2021    | 1.00 | 1.06 | 0.99 | 0.98 | 1.00 | 0.97 | 1.05 | 1.05 | 0.97 | 0.97 | 0.98 | 1.02 | 1.01 | 1.02 | 0.98 |
| Oct 2021    | 1.19 | 1.39 | 0.98 | 1.03 | 1.05 | 1.03 | 1.07 | 1.35 | 1.03 | 1.00 | 1.04 | 1.05 | 1.07 | 0.90 | 0.99 |
| Nov 2021    | 1.11 | 1.04 | 1.03 | 1.04 | 1.00 | 1.04 | 1.01 | 1.23 | 1.07 | 1.15 | 1.00 | 1.02 | 1.05 | 1.02 | 1.00 |
| Dec 2021    | 0.98 | 0.95 | 1.01 | 1.03 | 1.04 | 1.07 | 0.82 | 0.98 | 0.95 | 1.00 | 0.97 | 1.10 | 1.03 | 1.01 | 1.00 |
| Jan 2022    | 1.23 | 1.24 | 1.02 | 0.98 | 1.02 | 1.03 | 1.25 | 1.00 | 1.05 | 1.04 | 1.12 | 1.19 | 1.00 | 1.13 | 1.00 |
| Feb 2022    | 1.17 | 1.34 | 1.01 | 1.05 | 0.99 | 1.04 | 1.21 | 1.04 | 1.04 | 1.07 | 1.15 | 1.15 | 0.99 | 1.30 | 1.01 |

\*Before 11 March. \*\*Starting from 11 March.

Table B6: The Relative RMSE of forecasting models for companies 76–90 listed in Table A1.

| Time period | 76   | 77   | 78   | 79   | 80   | 81   | 82   | 83   | 84   | 85   | 86   | 87   | 88   | 89   | 90   |
|-------------|------|------|------|------|------|------|------|------|------|------|------|------|------|------|------|
| 2010–2018   | 0.94 | 0.96 | 0.97 | 0.97 | 0.98 | 0.96 | 0.95 | 0.95 | 0.98 | 0.98 | 0.92 | 0.97 | 0.98 | 0.97 | 0.94 |
| Jan 2019    | 1.04 | 1.00 | 0.98 | 0.98 | 0.95 | 0.93 | 0.95 | 1.06 | 1.01 | 0.93 | 0.94 | 0.96 | 0.98 | 0.94 | 0.98 |
| Feb 2019    | 0.94 | 0.98 | 0.98 | 0.96 | 1.01 | 0.96 | 0.96 | 0.94 | 0.97 | 0.93 | 0.90 | 0.98 | 0.93 | 0.92 | 0.97 |
| Mar 2019    | 1.00 | 1.00 | 1.01 | 0.98 | 0.99 | 0.98 | 0.99 | 1.00 | 1.03 | 0.98 | 1.01 | 1.00 | 1.01 | 1.00 | 1.00 |
| Apr 2019    | 0.93 | 0.97 | 0.98 | 0.99 | 1.02 | 0.92 | 0.96 | 0.96 | 0.91 | 0.94 | 0.91 | 0.97 | 0.93 | 1.03 | 0.86 |
| May 2019    | 1.07 | 1.03 | 1.01 | 1.00 | 1.06 | 1.08 | 1.03 | 1.02 | 1.01 | 0.95 | 1.01 | 1.03 | 0.97 | 1.02 | 1.17 |
| Jun 2019    | 0.87 | 0.95 | 0.96 | 0.98 | 0.98 | 1.09 | 0.88 | 0.89 | 0.97 | 0.95 | 0.93 | 0.92 | 0.89 | 0.92 | 0.87 |
| Jul 2019    | 0.91 | 0.99 | 0.97 | 0.98 | 1.02 | 1.00 | 1.00 | 0.94 | 0.92 | 1.00 | 0.99 | 0.99 | 0.91 | 0.98 | 0.90 |
| Aug 2019    | 0.92 | 0.95 | 0.94 | 0.95 | 0.98 | 0.88 | 0.89 | 0.86 | 0.90 | 0.94 | 1.02 | 0.92 | 1.01 | 0.94 | 0.96 |
| Sep 2019    | 1.03 | 1.01 | 1.00 | 1.00 | 1.01 | 0.89 | 1.02 | 0.93 | 1.05 | 1.00 | 1.03 | 1.04 | 1.01 | 1.00 | 1.04 |
| Oct 2019    | 1.00 | 0.95 | 0.92 | 0.98 | 0.99 | 1.00 | 0.95 | 1.02 | 0.92 | 0.96 | 0.96 | 0.92 | 0.96 | 0.96 | 1.16 |
| Nov 2019    | 1.16 | 1.06 | 0.99 | 1.01 | 0.97 | 1.16 | 0.98 | 1.04 | 0.98 | 0.94 | 0.95 | 1.06 | 1.14 | 1.06 | 1.24 |
| Dec 2019    | 0.98 | 0.90 | 0.99 | 0.93 | 0.98 | 0.97 | 1.17 | 0.94 | 1.21 | 1.09 | 1.07 | 1.10 | 1.17 | 0.96 | 1.02 |
| Jan 2020    | 1.05 | 0.96 | 1.00 | 1.00 | 1.04 | 1.01 | 0.98 | 0.97 | 1.15 | 0.98 | 1.10 | 1.05 | 1.04 | 1.06 | 1.13 |
| Feb 2020    | 0.84 | 0.94 | 0.94 | 0.94 | 0.97 | 0.96 | 0.96 | 0.90 | 0.88 | 0.92 | 0.86 | 0.92 | 0.97 | 0.91 | 0.82 |
| Mar 2020*   | 1.13 | 0.74 | 0.85 | 0.75 | 0.97 | 0.82 | 1.08 | 0.85 | 0.88 | 0.90 | 0.78 | 0.86 | 0.87 | 0.80 | 0.73 |
| Mar 2020**  | 1.29 | 1.13 | 1.08 | 1.16 | 1.01 | 0.75 | 0.92 | 1.14 | 1.03 | 1.03 | 1.14 | 1.12 | 1.10 | 1.05 | 1.25 |
| Apr 2020    | 1.12 | 1.04 | 1.01 | 1.17 | 1.00 | 0.99 | 1.07 | 0.98 | 1.07 | 0.99 | 1.20 | 0.97 | 0.99 | 1.01 | 1.07 |
| May 2020    | 1.22 | 1.04 | 0.96 | 0.91 | 0.94 | 0.86 | 0.94 | 0.79 | 1.08 | 0.90 | 0.91 | 0.97 | 0.85 | 0.88 | 0.78 |
| Jun 2020    | 1.14 | 1.07 | 0.99 | 1.08 | 0.99 | 0.95 | 0.97 | 0.94 | 1.05 | 0.95 | 1.05 | 0.91 | 0.95 | 0.96 | 1.03 |
| Jul 2020    | 1.20 | 1.05 | 1.00 | 1.12 | 0.96 | 1.09 | 0.99 | 1.00 | 1.37 | 1.02 | 0.95 | 1.04 | 0.94 | 0.99 | 0.99 |
| Aug 2020    | 1.28 | 1.19 | 1.01 | 1.03 | 0.97 | 0.79 | 0.93 | 0.96 | 1.13 | 0.94 | 0.96 | 0.95 | 0.92 | 0.95 | 0.88 |
| Sep 2020    | 1.07 | 1.01 | 0.99 | 1.03 | 0.96 | 0.96 | 1.01 | 0.98 | 1.03 | 0.99 | 0.96 | 0.96 | 0.96 | 0.98 | 0.98 |
| Oct 2020    | 1.14 | 1.04 | 1.01 | 0.94 | 0.96 | 0.97 | 0.98 | 1.02 | 1.09 | 0.96 | 1.01 | 1.02 | 0.95 | 1.01 | 1.07 |
| Nov 2020    | 1.01 | 1.06 | 1.01 | 0.97 | 0.94 | 0.95 | 0.99 | 0.94 | 1.00 | 0.93 | 0.97 | 0.91 | 0.97 | 0.94 | 0.95 |
| Dec 2020    | 0.95 | 0.98 | 0.96 | 1.10 | 0.98 | 1.02 | 1.00 | 0.95 | 1.00 | 1.01 | 1.05 | 0.95 | 1.20 | 0.98 | 0.96 |
| Jan 2021    | 1.09 | 0.96 | 1.10 | 0.91 | 0.88 | 0.97 | 0.96 | 1.04 | 0.93 | 0.99 | 0.93 | 0.99 | 1.05 | 0.91 | 1.19 |
| Feb 2021    | 1.17 | 1.03 | 0.93 | 0.99 | 1.02 | 1.05 | 0.91 | 1.02 | 1.00 | 0.95 | 1.00 | 1.00 | 1.10 | 0.99 | 1.12 |
| Mar 2021    | 1.19 | 1.07 | 1.01 | 1.05 | 1.00 | 1.17 | 1.21 | 1.01 | 0.99 | 1.03 | 1.06 | 1.02 | 1.23 | 1.03 | 1.10 |
| Apr 2021    | 1.35 | 1.21 | 1.02 | 1.23 | 0.98 | 0.99 | 1.03 | 0.98 | 1.19 | 0.98 | 1.11 | 1.04 | 1.24 | 1.15 | 1.12 |
| May 2021    | 1.61 | 1.24 | 1.02 | 1.31 | 0.98 | 1.10 | 1.01 | 1.36 | 1.30 | 1.10 | 0.93 | 1.08 | 1.23 | 1.12 | 1.44 |
| Jun 2021    | 1.06 | 1.28 | 0.98 | 1.12 | 0.92 | 0.87 | 0.98 | 1.05 | 1.13 | 0.93 | 1.01 | 0.92 | 1.38 | 1.02 | 1.14 |
| Jul 2021    | 2.22 | 1.10 | 0.97 | 1.31 | 0.90 | 0.97 | 0.96 | 0.96 | 1.57 | 0.94 | 1.01 | 1.07 | 1.28 | 0.95 | 1.10 |
| Aug 2021    | 1.86 | 1.54 | 1.00 | 1.18 | 1.07 | 1.08 | 1.13 | 1.81 | 2.22 | 1.05 | 1.19 | 1.05 | 1.38 | 1.00 | 1.76 |
| Sep 2021    | 1.02 | 1.01 | 1.00 | 1.03 | 0.97 | 0.98 | 1.19 | 1.00 | 0.96 | 1.01 | 1.13 | 0.96 | 0.94 | 1.04 | 1.04 |
| Oct 2021    | 1.51 | 1.08 | 0.99 | 1.13 | 1.04 | 1.24 | 0.99 | 0.94 | 0.97 | 1.11 | 1.10 | 1.13 | 1.13 | 1.06 | 1.10 |
| Nov 2021    | 1.00 | 1.01 | 1.04 | 1.01 | 1.03 | 1.17 | 1.01 | 0.91 | 0.98 | 1.02 | 1.14 | 1.06 | 1.01 | 1.05 | 1.10 |
| Dec 2021    | 1.37 | 0.96 | 1.07 | 1.07 | 1.01 | 1.44 | 0.97 | 1.05 | 0.92 | 0.98 | 0.95 | 1.00 | 1.24 | 1.00 | 1.02 |
| Jan 2022    | 1.27 | 1.14 | 1.00 | 1.19 | 1.00 | 1.02 | 0.99 | 0.98 | 0.98 | 0.99 | 1.02 | 1.05 | 1.02 | 0.99 | 1.09 |
| Feb 2022    | 1.30 | 1.18 | 1.00 | 1.16 | 1.01 | 1.02 | 1.03 | 1.05 | 1.11 | 1.00 | 1.09 | 0.99 | 1.14 | 1.04 | 1.10 |

\*Before 11 March. \*\*Starting from 11 March.



### C. The Relative MAE Values for All Models

Table C1: The Relative MAE of forecasting models for companies 1–15 listed in Table A1.

| Time period | 1    | 2    | 3    | 4    | 5    | 6    | 7    | 8    | 9    | 10   | 11   | 12   | 13   | 14   | 15   |
|-------------|------|------|------|------|------|------|------|------|------|------|------|------|------|------|------|
| 2010–2018   | 1.01 | 1.00 | 1.02 | 0.98 | 1.06 | 0.97 | 1.03 | 1.02 | 1.02 | 1.02 | 0.99 | 1.02 | 1.06 | 0.99 | 1.00 |
| Jan 2019    | 1.00 | 1.03 | 1.19 | 0.94 | 0.93 | 0.99 | 0.98 | 1.01 | 1.04 | 0.95 | 1.03 | 1.04 | 1.05 | 0.99 | 0.93 |
| Feb 2019    | 1.03 | 0.98 | 1.04 | 1.01 | 1.00 | 0.92 | 0.90 | 0.94 | 0.97 | 1.10 | 0.92 | 0.94 | 1.04 | 0.92 | 0.99 |
| Mar 2019    | 0.98 | 0.99 | 0.96 | 0.95 | 1.12 | 1.00 | 0.93 | 0.93 | 0.95 | 1.09 | 0.95 | 0.97 | 1.02 | 0.94 | 0.95 |
| Apr 2019    | 1.03 | 1.00 | 1.01 | 1.06 | 0.98 | 0.98 | 1.01 | 0.92 | 1.02 | 1.03 | 1.00 | 0.96 | 0.99 | 1.05 | 1.04 |
| May 2019    | 1.05 | 1.04 | 1.15 | 1.04 | 1.30 | 1.05 | 1.03 | 1.04 | 1.00 | 1.20 | 1.07 | 1.08 | 1.19 | 1.11 | 1.07 |
| Jun 2019    | 0.88 | 0.96 | 0.97 | 0.95 | 1.15 | 0.97 | 1.01 | 0.91 | 0.91 | 0.97 | 0.92 | 0.96 | 1.02 | 0.97 | 1.03 |
| Jul 2019    | 0.93 | 0.97 | 1.19 | 0.99 | 1.17 | 0.99 | 1.06 | 0.99 | 0.99 | 1.08 | 0.93 | 1.06 | 1.06 | 1.00 | 0.98 |
| Aug 2019    | 1.00 | 0.99 | 1.04 | 1.14 | 1.10 | 1.04 | 1.04 | 0.89 | 1.07 | 1.03 | 0.94 | 1.14 | 1.14 | 0.98 | 0.99 |
| Sep 2019    | 1.02 | 0.99 | 1.09 | 0.93 | 0.84 | 0.94 | 1.03 | 1.14 | 1.05 | 0.98 | 0.99 | 1.06 | 1.14 | 1.10 | 0.95 |
| Oct 2019    | 1.03 | 0.97 | 1.13 | 0.99 | 0.90 | 0.94 | 1.02 | 1.03 | 1.02 | 1.05 | 0.93 | 1.04 | 1.08 | 0.97 | 1.02 |
| Nov 2019    | 1.23 | 1.03 | 1.27 | 1.00 | 1.01 | 1.03 | 1.08 | 1.12 | 1.01 | 1.25 | 1.11 | 1.02 | 2.41 | 1.11 | 1.08 |
| Dec 2019    | 1.10 | 1.09 | 1.18 | 1.17 | 1.01 | 1.07 | 1.07 | 1.18 | 0.97 | 1.24 | 1.12 | 1.07 | 1.45 | 1.16 | 2.25 |
| Jan 2020    | 1.01 | 1.01 | 1.07 | 1.03 | 1.00 | 1.05 | 1.05 | 1.09 | 1.09 | 1.02 | 1.02 | 1.11 | 1.23 | 1.33 | 1.23 |
| Feb 2020    | 0.96 | 0.98 | 1.01 | 0.99 | 1.00 | 0.93 | 0.96 | 0.92 | 0.96 | 0.91 | 0.93 | 1.01 | 0.92 | 0.92 | 0.91 |
| Mar 2020*   | 1.03 | 0.95 | 0.97 | 0.89 | 0.98 | 0.91 | 0.94 | 0.88 | 0.84 | 0.88 | 0.96 | 0.95 | 0.87 | 1.08 | 1.10 |
| Mar 2020**  | 0.92 | 0.92 | 1.05 | 1.10 | 1.26 | 1.02 | 1.09 | 1.22 | 1.18 | 1.21 | 1.13 | 1.14 | 1.08 | 1.12 | 1.14 |
| Apr 2020    | 1.03 | 0.99 | 1.03 | 1.08 | 1.23 | 1.14 | 1.12 | 1.03 | 1.08 | 1.11 | 1.05 | 0.98 | 1.08 | 1.06 | 1.00 |
| May 2020    | 0.92 | 0.94 | 1.15 | 1.31 | 1.16 | 0.89 | 0.89 | 0.88 | 0.88 | 0.75 | 1.00 | 1.12 | 0.96 | 0.96 | 0.95 |
| Jun 2020    | 1.00 | 0.98 | 1.02 | 1.00 | 1.20 | 1.02 | 0.99 | 1.01 | 1.07 | 1.16 | 1.04 | 1.21 | 0.98 | 1.02 | 0.96 |
| Jul 2020    | 1.03 | 1.01 | 1.31 | 1.07 | 1.03 | 1.05 | 1.06 | 1.06 | 1.03 | 1.27 | 1.11 | 0.95 | 1.18 | 1.14 | 1.19 |
| Aug 2020    | 1.02 | 1.07 | 1.15 | 1.06 | 1.48 | 1.07 | 0.94 | 1.01 | 1.26 | 1.28 | 1.14 | 1.49 | 1.06 | 0.98 | 1.04 |
| Sep 2020    | 0.98 | 0.93 | 1.08 | 1.13 | 1.12 | 0.97 | 0.96 | 0.94 | 1.14 | 0.99 | 1.01 | 1.04 | 1.02 | 0.89 | 0.97 |
| Oct 2020    | 0.93 | 1.03 | 1.12 | 0.97 | 1.02 | 0.95 | 0.99 | 0.96 | 0.85 | 1.03 | 1.11 | 1.08 | 0.98 | 1.03 | 1.05 |
| Nov 2020    | 0.95 | 1.00 | 1.41 | 0.98 | 1.16 | 0.87 | 1.02 | 1.07 | 1.11 | 1.01 | 1.02 | 1.03 | 1.07 | 1.00 | 1.02 |
| Dec 2020    | 0.99 | 1.04 | 1.34 | 0.96 | 1.27 | 1.03 | 1.02 | 1.15 | 1.13 | 1.26 | 1.06 | 1.68 | 1.17 | 1.33 | 1.26 |
| Jan 2021    | 0.94 | 1.03 | 1.13 | 0.99 | 1.09 | 1.17 | 1.06 | 1.01 | 1.09 | 1.06 | 1.10 | 1.22 | 1.00 | 1.09 | 1.56 |
| Feb 2021    | 0.96 | 1.14 | 1.82 | 1.07 | 0.91 | 1.20 | 1.09 | 0.98 | 0.93 | 1.00 | 1.13 | 1.19 | 1.02 | 1.18 | 1.03 |
| Mar 2021    | 0.95 | 1.00 | 1.08 | 1.31 | 1.17 | 0.99 | 1.14 | 1.09 | 1.53 | 1.06 | 1.13 | 1.20 | 1.14 | 1.18 | 1.16 |
| Apr 2021    | 1.04 | 0.97 | 1.19 | 1.40 | 1.71 | 1.18 | 1.10 | 1.25 | 1.30 | 1.27 | 1.15 | 1.08 | 1.06 | 1.14 | 1.47 |
| May 2021    | 1.18 | 1.22 | 1.19 | 1.53 | 1.29 | 1.22 | 1.43 | 1.26 | 2.28 | 1.26 | 1.32 | 1.18 | 1.12 | 1.06 | 1.49 |
| Jun 2021    | 0.90 | 0.97 | 0.98 | 1.32 | 1.06 | 1.20 | 1.09 | 0.94 | 1.22 | 1.09 | 1.37 | 1.17 | 1.17 | 0.92 | 1.09 |
| Jul 2021    | 1.13 | 1.01 | 1.09 | 1.14 | 1.62 | 1.47 | 1.18 | 1.14 | 1.41 | 1.27 | 1.28 | 0.82 | 0.97 | 1.45 | 0.97 |
| Aug 2021    | 1.06 | 1.44 | 1.26 | 1.67 | 1.99 | 1.79 | 1.52 | 1.65 | 1.73 | 1.62 | 1.82 | 1.22 | 1.89 | 1.25 | 1.22 |
| Sep 2021    | 1.12 | 1.06 | 1.19 | 1.11 | 1.46 | 1.19 | 1.08 | 1.14 | 1.21 | 1.19 | 1.42 | 1.00 | 1.29 | 1.12 | 1.07 |
| Oct 2021    | 1.12 | 1.02 | 1.10 | 1.06 | 1.11 | 1.07 | 1.06 | 1.11 | 1.35 | 1.11 | 1.16 | 1.89 | 1.02 | 1.16 | 1.01 |
| Nov 2021    | 1.03 | 0.88 | 1.23 | 1.27 | 1.21 | 1.04 | 1.07 | 1.30 | 1.22 | 1.00 | 0.97 | 1.46 | 1.14 | 1.14 | 1.12 |
| Dec 2021    | 1.05 | 1.00 | 1.11 | 1.04 | 1.19 | 1.00 | 0.88 | 1.10 | 1.43 | 1.36 | 1.20 | 1.81 | 1.10 | 1.08 | 1.06 |
| Jan 2022    | 1.07 | 1.10 | 1.07 | 1.14 | 1.02 | 1.19 | 1.08 | 1.04 | 1.11 | 1.13 | 1.11 | 1.16 | 1.05 | 0.99 | 1.03 |
| Feb 2022    | 1.00 | 1.02 | 1.04 | 1.06 | 1.07 | 1.17 | 1.02 | 1.05 | 1.27 | 1.06 | 1.12 | 1.00 | 1.02 | 0.96 | 0.97 |

\*Before 11 March. \*\*Starting from 11 March.

Table C2: The Relative MAE of forecasting models for companies 16–30 listed in Table A1.

| Time period | 16   | 17   | 18   | 19    | 20   | 21    | 22   | 23   | 24   | 25   | 26   | 27   | 28   | 29   | 30   |
|-------------|------|------|------|-------|------|-------|------|------|------|------|------|------|------|------|------|
| 2010–2018   | 1.01 | 0.99 | 1.01 | 1.05  | 0.96 | 1.03  | 0.99 | 1.03 | 0.99 | 1.00 | 1.03 | 1.00 | 1.01 | 0.99 | 0.98 |
| Jan 2019    | 0.97 | 1.01 | 1.00 | 1.09  | 1.02 | 1.09  | 1.01 | 1.00 | 0.98 | 0.97 | 1.14 | 1.00 | 1.00 | 1.14 | 1.05 |
| Feb 2019    | 1.00 | 0.90 | 0.87 | 1.15  | 0.91 | 0.96  | 0.92 | 1.01 | 1.00 | 0.96 | 1.01 | 0.97 | 1.00 | 0.94 | 0.92 |
| Mar 2019    | 1.01 | 0.96 | 1.05 | 1.08  | 1.04 | 1.00  | 0.90 | 1.03 | 0.96 | 0.98 | 0.96 | 1.02 | 0.97 | 0.94 | 0.99 |
| Apr 2019    | 1.04 | 1.00 | 0.94 | 1.15  | 0.95 | 1.03  | 1.04 | 1.03 | 1.13 | 0.99 | 1.24 | 1.08 | 1.05 | 1.21 | 1.03 |
| May 2019    | 1.24 | 1.05 | 1.09 | 1.03  | 1.10 | 1.07  | 1.04 | 1.09 | 1.06 | 1.04 | 1.07 | 1.09 | 1.14 | 1.45 | 1.11 |
| Jun 2019    | 1.04 | 0.96 | 0.95 | 1.01  | 0.88 | 1.01  | 0.91 | 0.93 | 0.95 | 1.02 | 0.91 | 0.99 | 0.99 | 0.87 | 0.78 |
| Jul 2019    | 1.06 | 0.99 | 1.06 | 1.02  | 0.97 | 1.01  | 0.95 | 1.02 | 0.97 | 1.18 | 1.00 | 0.96 | 1.02 | 0.94 | 0.91 |
| Aug 2019    | 1.03 | 1.02 | 1.09 | 1.18  | 1.03 | 1.02  | 0.99 | 1.00 | 1.01 | 1.08 | 0.98 | 1.07 | 1.09 | 0.91 | 0.99 |
| Sep 2019    | 1.01 | 0.96 | 1.05 | 1.17  | 1.03 | 1.00  | 0.93 | 1.04 | 1.04 | 1.06 | 1.01 | 1.09 | 1.09 | 1.21 | 1.08 |
| Oct 2019    | 1.03 | 1.00 | 1.18 | 1.18  | 1.18 | 0.93  | 1.02 | 1.03 | 1.00 | 1.03 | 1.05 | 1.09 | 1.07 | 1.47 | 1.06 |
| Nov 2019    | 1.00 | 0.93 | 1.07 | 2.69  | 1.00 | 1.05  | 1.05 | 1.06 | 1.04 | 0.94 | 1.04 | 1.17 | 1.22 | 1.28 | 1.15 |
| Dec 2019    | 1.31 | 0.99 | 1.49 | 1.63  | 1.11 | 1.09  | 1.03 | 1.12 | 0.97 | 1.10 | 0.99 | 1.13 | 1.08 | 1.69 | 1.14 |
| Jan 2020    | 1.02 | 1.03 | 1.07 | 5.99  | 1.22 | 1.06  | 1.06 | 1.07 | 1.01 | 0.98 | 1.05 | 1.10 | 1.15 | 1.28 | 0.93 |
| Feb 2020    | 0.97 | 0.90 | 0.95 | 1.12  | 0.96 | 1.00  | 0.91 | 1.00 | 0.89 | 0.92 | 1.03 | 0.94 | 0.92 | 0.74 | 0.93 |
| Mar 2020*   | 1.03 | 0.90 | 0.90 | 0.92  | 0.94 | 1.10  | 0.93 | 0.89 | 1.04 | 1.03 | 1.04 | 0.82 | 0.85 | 0.81 | 0.83 |
| Mar 2020**  | 1.03 | 1.12 | 1.23 | 1.18  | 1.05 | 1.32  | 1.07 | 1.05 | 1.12 | 1.02 | 1.06 | 1.23 | 1.21 | 1.46 | 1.21 |
| Apr 2020    | 1.09 | 1.11 | 1.04 | 1.11  | 0.94 | 1.07  | 1.16 | 1.05 | 1.08 | 0.96 | 1.12 | 1.11 | 1.14 | 1.26 | 1.12 |
| May 2020    | 1.30 | 0.85 | 0.96 | 1.12  | 0.87 | 1.29  | 1.03 | 0.95 | 0.98 | 1.16 | 1.06 | 0.99 | 1.00 | 0.88 | 0.98 |
| Jun 2020    | 1.06 | 1.15 | 0.92 | 1.07  | 0.98 | 1.10  | 1.11 | 1.07 | 1.09 | 1.06 | 1.05 | 1.07 | 1.22 | 1.19 | 1.05 |
| Jul 2020    | 1.12 | 1.22 | 1.03 | 1.06  | 0.98 | 1.46  | 1.22 | 1.10 | 1.18 | 1.10 | 0.98 | 1.24 | 1.12 | 1.23 | 0.97 |
| Aug 2020    | 0.98 | 1.10 | 0.96 | 1.20  | 0.95 | 1.23  | 1.51 | 1.05 | 1.12 | 1.02 | 1.03 | 1.64 | 1.19 | 1.41 | 0.96 |
| Sep 2020    | 0.95 | 1.05 | 0.94 | 1.17  | 0.92 | 1.12  | 1.08 | 0.98 | 1.07 | 0.99 | 1.05 | 1.07 | 1.00 | 1.14 | 0.95 |
| Oct 2020    | 1.10 | 1.01 | 1.05 | 1.28  | 0.95 | 1.12  | 1.08 | 1.10 | 0.99 | 1.21 | 1.04 | 1.21 | 1.01 | 1.23 | 0.88 |
| Nov 2020    | 0.96 | 1.04 | 0.98 | 1.11  | 1.02 | 1.00  | 1.03 | 1.02 | 0.94 | 1.07 | 1.06 | 1.14 | 1.04 | 1.15 | 0.94 |
| Dec 2020    | 1.26 | 1.10 | 1.10 | 11.59 | 1.02 | 1.04  | 1.11 | 1.14 | 1.08 | 1.10 | 1.24 | 1.27 | 1.25 | 1.48 | 0.89 |
| Jan 2021    | 1.07 | 1.07 | 0.94 | 1.24  | 1.00 | 0.97  | 1.09 | 1.53 | 1.14 | 0.88 | 2.26 | 0.96 | 1.15 | 1.06 | 1.02 |
| Feb 2021    | 1.01 | 1.08 | 1.11 | 1.22  | 0.93 | 1.16  | 1.07 | 1.12 | 0.96 | 1.21 | 2.29 | 1.12 | 1.09 | 1.51 | 0.93 |
| Mar 2021    | 1.18 | 1.09 | 1.02 | 1.40  | 1.08 | 1.28  | 1.18 | 1.09 | 1.06 | 0.92 | 1.33 | 1.10 | 1.14 | 1.58 | 1.12 |
| Apr 2021    | 1.39 | 1.23 | 1.19 | 2.11  | 1.31 | 1.18  | 1.26 | 1.15 | 1.20 | 1.08 | 1.24 | 1.57 | 1.35 | 1.44 | 1.02 |
| May 2021    | 1.37 | 1.52 | 1.75 | 2.69  | 1.22 | 1.38  | 1.36 | 1.10 | 1.49 | 1.49 | 1.45 | 1.30 | 1.22 | 2.29 | 1.27 |
| Jun 2021    | 1.07 | 1.15 | 1.00 | 2.85  | 0.85 | 1.65  | 1.32 | 1.06 | 1.28 | 1.13 | 1.13 | 1.75 | 1.08 | 1.81 | 1.02 |
| Jul 2021    | 1.17 | 2.02 | 1.07 | 1.61  | 1.02 | 17.68 | 1.20 | 1.00 | 2.08 | 1.13 | 1.33 | 1.53 | 1.52 | 2.78 | 1.03 |
| Aug 2021    | 1.96 | 1.98 | 1.82 | 3.52  | 1.24 | 4.96  | 2.48 | 1.10 | 2.98 | 1.26 | 1.40 | 0.98 | 1.36 | 2.27 | 1.41 |
| Sep 2021    | 1.30 | 1.08 | 1.07 | 2.37  | 1.21 | 2.01  | 1.20 | 1.10 | 1.07 | 1.13 | 1.16 | 1.04 | 1.14 | 1.52 | 1.26 |
| Oct 2021    | 1.34 | 1.48 | 0.95 | 1.60  | 1.02 | 2.08  | 1.03 | 1.09 | 1.10 | 1.01 | 1.17 | 1.25 | 1.24 | 1.58 | 0.99 |
| Nov 2021    | 1.06 | 1.08 | 1.10 | 1.92  | 0.87 | 2.40  | 1.15 | 1.04 | 1.11 | 0.91 | 1.05 | 1.13 | 1.15 | 1.42 | 1.39 |
| Dec 2021    | 1.25 | 1.18 | 1.10 | 1.74  | 1.04 | 1.43  | 1.16 | 1.04 | 1.14 | 1.04 | 1.55 | 1.77 | 1.06 | 1.44 | 1.15 |
| Jan 2022    | 1.12 | 1.28 | 1.01 | 1.08  | 1.11 | 1.32  | 1.28 | 1.10 | 1.22 | 1.12 | 1.05 | 1.22 | 1.19 | 1.38 | 0.94 |
| Feb 2022    | 1.02 | 1.35 | 1.06 | 0.95  | 1.01 | 1.31  | 1.29 | 1.02 | 1.29 | 1.26 | 0.96 | 1.21 | 1.17 | 1.47 | 1.00 |

\*Before 11 March. \*\*Starting from 11 March.

Table C3: The Relative MAE of forecasting models for companies 31–45 listed in Table A1.

| Time period | 31   | 32   | 33   | 34   | 35   | 36   | 37   | 38   | 39   | 40   | 41   | 42   | 43   | 44   | 45    |
|-------------|------|------|------|------|------|------|------|------|------|------|------|------|------|------|-------|
| 2010–2018   | 1.04 | 1.01 | 0.99 | 1.00 | 1.04 | 1.02 | 1.04 | 1.00 | 0.99 | 1.02 | 1.04 | 0.98 | 1.05 | 1.02 | 1.07  |
| Jan 2019    | 0.96 | 0.99 | 1.03 | 1.03 | 0.90 | 1.01 | 1.10 | 0.99 | 1.01 | 1.21 | 1.01 | 0.98 | 1.08 | 1.00 | 1.05  |
| Feb 2019    | 0.92 | 1.10 | 0.85 | 0.95 | 1.10 | 0.97 | 0.94 | 0.99 | 0.88 | 0.91 | 0.99 | 0.94 | 1.09 | 0.92 | 2.41  |
| Mar 2019    | 1.00 | 1.01 | 0.93 | 1.05 | 0.95 | 1.03 | 1.01 | 1.01 | 0.99 | 1.11 | 1.00 | 1.00 | 1.10 | 1.02 | 1.22  |
| Apr 2019    | 1.02 | 1.03 | 1.00 | 0.99 | 1.07 | 1.09 | 1.07 | 0.99 | 0.95 | 1.02 | 1.05 | 1.07 | 1.02 | 0.99 | 5.03  |
| May 2019    | 1.12 | 1.26 | 1.03 | 1.15 | 1.08 | 1.14 | 1.07 | 1.04 | 1.06 | 1.11 | 1.05 | 1.06 | 1.19 | 1.15 | 1.74  |
| Jun 2019    | 1.01 | 1.00 | 0.91 | 1.05 | 1.13 | 0.88 | 0.86 | 0.98 | 0.91 | 0.95 | 1.00 | 0.92 | 1.00 | 0.97 | 1.12  |
| Jul 2019    | 0.96 | 1.19 | 0.89 | 1.01 | 1.08 | 0.99 | 0.97 | 0.98 | 0.99 | 1.03 | 1.01 | 1.02 | 1.04 | 0.98 | 1.12  |
| Aug 2019    | 0.99 | 1.04 | 0.93 | 1.06 | 1.16 | 1.00 | 0.96 | 1.02 | 0.99 | 1.12 | 1.06 | 1.03 | 1.22 | 1.06 | 1.20  |
| Sep 2019    | 1.11 | 1.09 | 1.12 | 0.92 | 1.20 | 1.02 | 0.96 | 0.99 | 0.98 | 1.18 | 1.05 | 1.08 | 1.26 | 1.07 | 1.17  |
| Oct 2019    | 1.18 | 0.99 | 1.13 | 1.13 | 1.06 | 1.09 | 1.04 | 0.97 | 0.99 | 1.01 | 1.02 | 1.16 | 1.02 | 1.02 | 1.18  |
| Nov 2019    | 1.10 | 1.06 | 1.11 | 1.05 | 1.27 | 1.34 | 1.01 | 0.99 | 1.06 | 1.32 | 1.06 | 1.15 | 1.11 | 1.22 | 1.35  |
| Dec 2019    | 1.05 | 1.08 | 1.20 | 1.23 | 1.34 | 1.17 | 0.98 | 0.99 | 1.10 | 1.16 | 1.20 | 1.59 | 1.12 | 1.07 | 1.35  |
| Jan 2020    | 1.15 | 1.27 | 1.01 | 1.19 | 1.16 | 1.01 | 1.06 | 1.06 | 1.03 | 1.20 | 1.04 | 1.18 | 1.21 | 1.19 | 1.15  |
| Feb 2020    | 0.96 | 0.93 | 0.88 | 0.93 | 0.93 | 0.91 | 0.96 | 0.96 | 0.93 | 1.07 | 0.97 | 0.92 | 1.05 | 0.97 | 1.22  |
| Mar 2020*   | 0.92 | 0.81 | 0.96 | 0.93 | 0.94 | 0.85 | 0.82 | 1.00 | 0.91 | 0.89 | 1.01 | 0.93 | 1.00 | 0.90 | 1.05  |
| Mar 2020**  | 1.09 | 1.04 | 1.03 | 1.24 | 1.18 | 1.16 | 1.12 | 1.02 | 1.21 | 1.08 | 1.01 | 1.22 | 1.04 | 1.04 | 1.17  |
| Apr 2020    | 1.03 | 1.16 | 1.08 | 1.05 | 0.99 | 1.16 | 1.27 | 1.03 | 1.07 | 1.17 | 1.09 | 1.11 | 0.96 | 1.18 | 1.09  |
| May 2020    | 0.95 | 0.86 | 1.30 | 0.98 | 1.07 | 1.02 | 1.53 | 0.92 | 0.91 | 0.90 | 1.05 | 1.00 | 0.96 | 0.93 | 1.32  |
| Jun 2020    | 0.96 | 1.16 | 1.27 | 0.94 | 0.99 | 1.13 | 1.05 | 0.98 | 0.95 | 0.96 | 1.06 | 1.23 | 0.99 | 1.02 | 1.06  |
| Jul 2020    | 1.03 | 1.47 | 1.27 | 1.06 | 0.99 | 1.00 | 0.99 | 1.02 | 0.98 | 1.40 | 1.25 | 1.13 | 1.04 | 1.09 | 1.32  |
| Aug 2020    | 1.03 | 1.56 | 2.10 | 0.98 | 1.03 | 1.10 | 1.05 | 1.02 | 0.99 | 1.09 | 1.12 | 1.39 | 1.10 | 1.11 | 3.67  |
| Sep 2020    | 0.97 | 1.03 | 1.11 | 0.93 | 1.02 | 0.95 | 1.09 | 0.93 | 0.91 | 1.09 | 0.97 | 1.03 | 1.00 | 1.07 | 1.22  |
| Oct 2020    | 0.97 | 0.99 | 0.99 | 1.05 | 0.97 | 0.98 | 0.99 | 1.03 | 0.91 | 1.36 | 1.00 | 1.18 | 0.99 | 1.06 | 1.12  |
| Nov 2020    | 1.01 | 1.02 | 1.12 | 0.96 | 1.02 | 0.99 | 0.56 | 1.01 | 0.97 | 1.29 | 0.98 | 1.06 | 0.97 | 1.00 | 1.03  |
| Dec 2020    | 1.11 | 1.04 | 1.59 | 1.26 | 1.25 | 1.07 | 0.93 | 1.02 | 1.07 | 1.24 | 1.01 | 1.23 | 1.02 | 1.10 | 1.36  |
| Jan 2021    | 1.26 | 1.01 | 1.35 | 0.94 | 1.00 | 1.03 | 1.17 | 1.02 | 0.87 | 0.99 | 0.98 | 1.70 | 1.01 | 1.12 | 1.80  |
| Feb 2021    | 1.15 | 1.08 | 1.17 | 1.01 | 1.00 | 0.94 | 1.31 | 0.99 | 1.59 | 1.09 | 1.08 | 1.11 | 1.01 | 1.07 | 1.14  |
| Mar 2021    | 1.13 | 1.08 | 1.33 | 1.03 | 1.19 | 1.07 | 1.15 | 1.01 | 1.20 | 1.04 | 1.04 | 1.10 | 0.96 | 1.11 | 2.89  |
| Apr 2021    | 1.10 | 1.57 | 1.87 | 1.22 | 1.15 | 1.16 | 1.22 | 1.11 | 1.06 | 1.57 | 1.08 | 1.63 | 1.10 | 1.09 | 1.41  |
| May 2021    | 1.32 | 1.57 | 1.66 | 1.14 | 1.14 | 1.31 | 1.28 | 1.04 | 1.69 | 1.51 | 1.43 | 2.18 | 0.97 | 1.14 | 41.65 |
| Jun 2021    | 1.14 | 1.32 | 1.53 | 0.93 | 0.94 | 1.10 | 1.17 | 1.03 | 1.44 | 1.79 | 1.03 | 1.39 | 1.07 | 1.09 | 31.11 |
| Jul 2021    | 1.06 | 1.49 | 1.33 | 0.93 | 1.34 | 1.24 | 1.31 | 1.25 | 1.33 | 1.58 | 1.06 | 1.50 | 0.98 | 0.92 | 62.35 |
| Aug 2021    | 1.21 | 1.65 | 1.90 | 1.50 | 2.38 | 1.27 | 1.59 | 1.59 | 1.92 | 1.98 | 1.16 | 1.52 | 1.02 | 1.17 | 3.40  |
| Sep 2021    | 1.10 | 1.09 | 1.29 | 1.15 | 1.08 | 1.17 | 1.27 | 1.10 | 1.21 | 1.57 | 1.07 | 1.07 | 0.98 | 1.14 | 1.12  |
| Oct 2021    | 1.13 | 1.67 | 1.10 | 1.10 | 1.15 | 1.11 | 1.20 | 1.04 | 0.94 | 0.97 | 0.95 | 1.01 | 1.01 | 1.15 | 1.66  |
| Nov 2021    | 1.22 | 1.18 | 1.27 | 1.10 | 1.09 | 1.46 | 1.03 | 0.99 | 1.17 | 1.18 | 1.01 | 1.15 | 1.02 | 1.11 | 1.37  |
| Dec 2021    | 1.17 | 0.98 | 1.19 | 1.05 | 1.16 | 1.15 | 0.96 | 0.97 | 1.08 | 1.32 | 1.09 | 1.16 | 0.98 | 1.20 | 2.46  |
| Jan 2022    | 1.03 | 1.16 | 1.25 | 1.12 | 1.11 | 1.07 | 1.50 | 1.07 | 1.01 | 1.35 | 1.07 | 1.20 | 0.98 | 1.07 | 1.31  |
| Feb 2022    | 1.00 | 1.16 | 1.50 | 1.03 | 0.95 | 1.02 | 1.18 | 1.06 | 1.01 | 1.08 | 1.02 | 1.20 | 0.93 | 1.01 | 1.00  |

\*Before 11 March. \*\*Starting from 11 March.

Table C4: The Relative MAE of forecasting models for companies 46–60 listed in Table A1.

| Time period | 46   | 47   | 48   | 49   | 50   | 51   | 52   | 53   | 54   | 55   | 56    | 57   | 58   | 59   | 60   |
|-------------|------|------|------|------|------|------|------|------|------|------|-------|------|------|------|------|
| 2010–2018   | 1.04 | 1.02 | 1.04 | 1.02 | 1.05 | 1.04 | 1.02 | 1.00 | 1.01 | 0.99 | 1.05  | 1.06 | 0.98 | 1.01 | 1.01 |
| Jan 2019    | 0.97 | 0.98 | 1.05 | 1.07 | 1.08 | 2.57 | 1.01 | 0.93 | 1.02 | 1.06 | 1.00  | 0.96 | 1.05 | 1.07 | 0.92 |
| Feb 2019    | 0.99 | 0.84 | 1.02 | 0.98 | 0.90 | 1.37 | 0.94 | 0.94 | 1.03 | 0.92 | 0.97  | 1.06 | 1.02 | 0.93 | 0.95 |
| Mar 2019    | 0.96 | 0.99 | 1.05 | 0.96 | 0.99 | 1.11 | 0.99 | 0.95 | 1.02 | 1.01 | 1.02  | 1.08 | 1.09 | 1.06 | 1.05 |
| Apr 2019    | 1.01 | 0.99 | 1.02 | 0.98 | 0.97 | 1.01 | 1.03 | 1.03 | 0.99 | 1.04 | 1.81  | 1.20 | 1.11 | 1.08 | 1.07 |
| May 2019    | 1.01 | 1.04 | 1.11 | 1.18 | 0.99 | 2.09 | 1.07 | 1.15 | 1.05 | 1.07 | 1.34  | 1.11 | 1.13 | 1.11 | 1.20 |
| Jun 2019    | 0.95 | 1.02 | 0.95 | 1.08 | 0.95 | 1.09 | 0.98 | 1.04 | 0.99 | 0.87 | 0.99  | 1.04 | 0.99 | 0.89 | 0.93 |
| Jul 2019    | 1.00 | 1.11 | 0.94 | 1.02 | 0.98 | 1.25 | 0.95 | 1.04 | 0.99 | 1.07 | 1.13  | 1.13 | 1.06 | 1.13 | 0.89 |
| Aug 2019    | 1.01 | 1.05 | 1.00 | 1.07 | 0.91 | 1.05 | 1.16 | 1.06 | 1.00 | 1.12 | 1.14  | 1.08 | 1.11 | 0.95 | 0.94 |
| Sep 2019    | 0.97 | 1.03 | 0.93 | 1.05 | 1.05 | 1.07 | 1.07 | 1.05 | 1.02 | 1.06 | 1.11  | 1.12 | 1.03 | 1.19 | 1.13 |
| Oct 2019    | 1.01 | 1.03 | 1.07 | 1.00 | 1.00 | 1.45 | 0.99 | 1.01 | 1.04 | 1.10 | 1.22  | 1.07 | 1.02 | 1.16 | 1.18 |
| Nov 2019    | 1.00 | 1.01 | 1.06 | 1.02 | 1.05 | 1.70 | 0.94 | 1.21 | 1.01 | 1.29 | 1.21  | 1.19 | 1.10 | 1.06 | 1.05 |
| Dec 2019    | 1.02 | 1.06 | 1.38 | 1.11 | 1.16 | 0.96 | 1.23 | 1.04 | 1.02 | 1.38 | 1.28  | 1.27 | 1.21 | 1.27 | 1.07 |
| Jan 2020    | 1.03 | 1.12 | 1.20 | 1.15 | 1.02 | 1.26 | 1.04 | 0.97 | 1.07 | 1.19 | 1.63  | 1.10 | 1.08 | 1.25 | 1.13 |
| Feb 2020    | 0.96 | 0.94 | 0.85 | 0.96 | 0.96 | 1.32 | 0.92 | 0.95 | 0.98 | 0.94 | 1.62  | 0.91 | 0.91 | 0.98 | 0.90 |
| Mar 2020*   | 0.95 | 1.08 | 0.96 | 0.97 | 0.87 | 1.32 | 1.01 | 0.94 | 0.99 | 0.99 | 3.02  | 0.97 | 1.08 | 1.03 | 1.05 |
| Mar 2020**  | 1.07 | 1.09 | 0.91 | 1.11 | 1.16 | 1.77 | 1.16 | 1.06 | 0.99 | 1.20 | 2.37  | 1.11 | 1.28 | 1.10 | 1.15 |
| Apr 2020    | 1.04 | 1.07 | 1.04 | 1.03 | 1.03 | 1.58 | 1.02 | 0.93 | 1.03 | 1.17 | 4.27  | 1.15 | 1.10 | 1.07 | 1.03 |
| May 2020    | 1.02 | 0.94 | 0.95 | 0.90 | 0.95 | 1.28 | 0.76 | 0.93 | 0.93 | 1.08 | 4.79  | 0.89 | 1.14 | 0.97 | 1.03 |
| Jun 2020    | 1.01 | 0.96 | 0.91 | 1.15 | 1.01 | 1.70 | 1.09 | 1.03 | 0.96 | 1.18 | 15.12 | 1.01 | 1.03 | 1.02 | 0.95 |
| Jul 2020    | 1.07 | 0.99 | 1.13 | 1.26 | 1.11 | 0.99 | 1.13 | 1.19 | 1.03 | 1.26 | 5.81  | 1.00 | 1.30 | 1.10 | 1.06 |
| Aug 2020    | 1.00 | 0.98 | 1.03 | 0.94 | 1.05 | 1.16 | 1.09 | 1.33 | 1.11 | 1.23 | 6.50  | 1.02 | 1.35 | 1.31 | 0.94 |
| Sep 2020    | 0.98 | 1.01 | 1.01 | 0.96 | 0.99 | 0.96 | 1.14 | 1.08 | 1.02 | 1.04 | 1.49  | 1.04 | 0.95 | 1.00 | 0.97 |
| Oct 2020    | 1.01 | 1.00 | 0.96 | 0.95 | 1.03 | 1.63 | 0.89 | 1.07 | 1.03 | 1.15 | 11.55 | 0.85 | 1.21 | 1.10 | 1.04 |
| Nov 2020    | 1.01 | 1.08 | 0.94 | 1.11 | 1.12 | 1.63 | 1.10 | 1.18 | 1.07 | 1.14 | 1.20  | 1.06 | 1.06 | 0.99 | 0.99 |
| Dec 2020    | 1.04 | 1.05 | 0.97 | 1.18 | 0.96 | 1.02 | 1.57 | 1.28 | 1.06 | 1.20 | 1.77  | 1.20 | 1.30 | 1.16 | 1.05 |
| Jan 2021    | 1.07 | 0.92 | 0.93 | 1.06 | 1.03 | 1.31 | 1.23 | 1.13 | 1.03 | 1.63 | 2.29  | 1.06 | 1.11 | 1.13 | 1.01 |
| Feb 2021    | 1.04 | 1.10 | 1.11 | 0.94 | 0.99 | 2.08 | 1.01 | 1.12 | 1.06 | 1.34 | 1.85  | 1.03 | 1.10 | 1.04 | 1.06 |
| Mar 2021    | 1.03 | 0.93 | 0.96 | 1.12 | 0.92 | 1.05 | 1.26 | 1.12 | 1.01 | 1.25 | 1.56  | 1.09 | 1.11 | 1.07 | 0.99 |
| Apr 2021    | 1.05 | 1.19 | 1.34 | 1.08 | 1.24 | 1.59 | 1.67 | 1.10 | 1.09 | 1.56 | 2.30  | 0.95 | 1.70 | 1.12 | 1.22 |
| May 2021    | 1.13 | 1.36 | 1.23 | 1.31 | 2.26 | 1.43 | 3.92 | 1.19 | 1.16 | 1.89 | 14.17 | 1.14 | 1.08 | 1.02 | 1.13 |
| Jun 2021    | 1.03 | 1.06 | 1.10 | 1.01 | 1.00 | 1.26 | 1.51 | 1.04 | 1.02 | 1.42 | 2.63  | 1.09 | 1.27 | 1.22 | 0.95 |
| Jul 2021    | 1.16 | 1.06 | 1.06 | 1.08 | 1.39 | 0.94 | 2.27 | 1.42 | 1.30 | 2.02 | 2.47  | 1.10 | 1.77 | 1.27 | 1.13 |
| Aug 2021    | 3.76 | 1.37 | 1.22 | 1.10 | 2.44 | 1.52 | 2.42 | 1.38 | 1.28 | 3.86 | 1.08  | 1.31 | 1.04 | 1.62 | 1.10 |
| Sep 2021    | 1.08 | 1.06 | 1.29 | 1.17 | 1.11 | 1.09 | 1.37 | 1.18 | 1.10 | 1.40 | 1.05  | 1.14 | 1.15 | 1.33 | 1.12 |
| Oct 2021    | 1.01 | 1.08 | 1.25 | 1.04 | 1.15 | 1.01 | 1.39 | 1.01 | 1.04 | 1.12 | 8.80  | 1.05 | 1.20 | 1.12 | 1.18 |
| Nov 2021    | 1.06 | 1.72 | 0.94 | 1.31 | 0.91 | 1.08 | 1.27 | 1.12 | 1.02 | 1.11 | 4.06  | 1.08 | 1.20 | 1.24 | 1.05 |
| Dec 2021    | 1.22 | 0.99 | 1.16 | 1.15 | 1.16 | 1.02 | 1.48 | 1.11 | 1.01 | 1.48 | 1.66  | 1.15 | 1.17 | 1.11 | 1.07 |
| Jan 2022    | 1.06 | 1.11 | 1.03 | 1.18 | 1.15 | 1.03 | 1.11 | 1.18 | 1.10 | 1.23 | 0.73  | 1.02 | 1.15 | 1.13 | 1.10 |
| Feb 2022    | 1.03 | 1.04 | 1.01 | 0.99 | 1.27 | 1.11 | 1.32 | 1.06 | 1.07 | 1.28 | 0.96  | 0.98 | 1.12 | 1.02 | 1.04 |

\*Before 11 March. \*\*Starting from 11 March.

Table C5: The Relative MAE of forecasting models for companies 61–75 listed in Table A1.

| Time period | 61   | 62   | 63   | 64   | 65   | 66   | 67   | 68   | 69   | 70   | 71   | 72   | 73   | 74   | 75   |
|-------------|------|------|------|------|------|------|------|------|------|------|------|------|------|------|------|
| 2010–2018   | 0.98 | 0.98 | 1.03 | 1.14 | 1.02 | 1.06 | 0.98 | 1.09 | 1.01 | 0.98 | 0.97 | 1.08 | 1.04 | 0.97 | 1.00 |
| Jan 2019    | 1.01 | 1.05 | 1.00 | 1.06 | 1.12 | 1.11 | 1.09 | 1.07 | 1.00 | 1.20 | 0.93 | 0.97 | 0.93 | 1.02 | 1.07 |
| Feb 2019    | 0.96 | 0.89 | 1.00 | 0.95 | 1.02 | 1.05 | 0.88 | 1.06 | 0.90 | 0.91 | 0.97 | 0.98 | 0.99 | 0.89 | 0.97 |
| Mar 2019    | 0.98 | 1.01 | 0.97 | 0.98 | 1.07 | 0.99 | 0.92 | 1.04 | 1.00 | 1.01 | 0.90 | 1.00 | 0.92 | 1.03 | 1.05 |
| Apr 2019    | 1.01 | 0.97 | 1.01 | 0.96 | 1.11 | 1.01 | 1.02 | 1.09 | 0.97 | 1.02 | 0.84 | 1.02 | 1.14 | 0.97 | 1.02 |
| May 2019    | 1.11 | 1.10 | 1.06 | 1.06 | 1.43 | 1.02 | 1.06 | 1.00 | 1.06 | 1.27 | 1.17 | 1.01 | 0.97 | 1.06 | 1.41 |
| Jun 2019    | 1.01 | 1.00 | 1.00 | 0.96 | 1.06 | 1.08 | 0.92 | 1.12 | 0.92 | 1.04 | 0.97 | 0.99 | 1.01 | 0.94 | 0.95 |
| Jul 2019    | 1.01 | 1.16 | 1.05 | 1.16 | 1.00 | 1.11 | 0.92 | 1.15 | 1.02 | 0.92 | 0.98 | 1.06 | 1.02 | 0.97 | 0.97 |
| Aug 2019    | 1.08 | 1.16 | 1.01 | 1.04 | 1.08 | 1.06 | 0.95 | 1.08 | 0.96 | 0.96 | 0.91 | 0.91 | 1.09 | 1.05 | 1.12 |
| Sep 2019    | 1.09 | 1.02 | 1.03 | 1.05 | 1.03 | 1.10 | 0.93 | 1.16 | 1.10 | 1.05 | 1.05 | 1.04 | 0.98 | 1.02 | 1.17 |
| Oct 2019    | 1.10 | 1.22 | 0.98 | 0.95 | 1.07 | 1.06 | 0.94 | 1.05 | 1.02 | 0.98 | 0.95 | 1.05 | 0.99 | 1.05 | 0.95 |
| Nov 2019    | 0.96 | 1.06 | 1.01 | 0.96 | 1.03 | 1.11 | 1.06 | 1.02 | 1.10 | 1.20 | 1.05 | 1.19 | 0.98 | 1.11 | 1.29 |
| Dec 2019    | 0.93 | 1.24 | 1.00 | 0.96 | 1.26 | 1.01 | 0.97 | 1.02 | 1.18 | 1.11 | 1.33 | 1.07 | 1.43 | 1.19 | 3.17 |
| Jan 2020    | 1.15 | 1.03 | 1.07 | 1.11 | 1.07 | 1.03 | 1.00 | 1.15 | 1.14 | 1.04 | 1.08 | 1.18 | 1.02 | 1.02 | 1.02 |
| Feb 2020    | 0.91 | 0.88 | 0.98 | 0.97 | 0.96 | 1.16 | 0.90 | 1.04 | 0.97 | 0.86 | 0.97 | 0.99 | 0.98 | 0.87 | 0.85 |
| Mar 2020*   | 1.05 | 0.94 | 0.94 | 1.04 | 0.89 | 1.06 | 0.85 | 1.03 | 0.86 | 0.94 | 1.01 | 0.98 | 1.03 | 0.89 | 0.99 |
| Mar 2020**  | 1.31 | 1.31 | 1.01 | 1.08 | 1.08 | 1.05 | 1.28 | 0.88 | 1.14 | 1.07 | 1.19 | 1.20 | 1.02 | 1.19 | 1.18 |
| Apr 2020    | 1.08 | 1.10 | 1.02 | 1.07 | 1.02 | 1.05 | 1.22 | 1.17 | 1.06 | 1.10 | 1.11 | 1.07 | 1.06 | 1.02 | 1.08 |
| May 2020    | 1.08 | 1.10 | 1.03 | 1.03 | 1.03 | 1.05 | 0.98 | 1.02 | 0.92 | 0.94 | 0.86 | 1.18 | 1.02 | 1.25 | 1.04 |
| Jun 2020    | 1.04 | 1.13 | 1.04 | 0.99 | 0.98 | 1.03 | 1.10 | 1.06 | 0.99 | 0.98 | 1.05 | 1.15 | 0.99 | 1.04 | 1.08 |
| Jul 2020    | 1.23 | 1.12 | 1.08 | 1.04 | 1.08 | 1.05 | 1.21 | 1.12 | 1.10 | 1.07 | 1.30 | 1.06 | 1.02 | 1.18 | 0.93 |
| Aug 2020    | 1.51 | 1.20 | 1.00 | 0.94 | 1.10 | 1.02 | 1.40 | 1.18 | 0.91 | 1.15 | 1.42 | 1.37 | 0.95 | 1.09 | 1.03 |
| Sep 2020    | 1.02 | 1.04 | 1.01 | 0.99 | 0.95 | 0.98 | 1.04 | 1.12 | 0.96 | 1.04 | 1.06 | 1.20 | 1.00 | 1.06 | 1.10 |
| Oct 2020    | 0.97 | 1.09 | 1.06 | 1.00 | 1.02 | 1.00 | 1.14 | 1.10 | 0.91 | 1.15 | 1.12 | 0.99 | 0.94 | 0.99 | 1.01 |
| Nov 2020    | 0.91 | 1.23 | 1.00 | 0.91 | 1.06 | 1.07 | 1.05 | 1.25 | 1.09 | 1.11 | 1.27 | 1.05 | 0.99 | 1.15 | 0.96 |
| Dec 2020    | 1.09 | 1.46 | 1.07 | 1.05 | 1.09 | 1.02 | 1.01 | 1.31 | 1.12 | 1.12 | 1.98 | 1.06 | 1.08 | 1.03 | 0.94 |
| Jan 2021    | 0.96 | 0.80 | 0.99 | 1.05 | 1.11 | 1.04 | 1.21 | 1.39 | 0.90 | 0.93 | 1.01 | 1.04 | 0.96 | 1.13 | 1.04 |
| Feb 2021    | 0.90 | 1.28 | 1.09 | 1.01 | 1.09 | 1.05 | 1.05 | 1.23 | 1.13 | 1.05 | 1.31 | 0.99 | 0.98 | 1.00 | 0.97 |
| Mar 2021    | 1.16 | 1.20 | 1.06 | 1.07 | 1.05 | 1.02 | 1.16 | 1.29 | 1.13 | 1.03 | 1.07 | 0.97 | 1.06 | 1.10 | 0.95 |
| Apr 2021    | 1.72 | 1.39 | 1.04 | 1.31 | 1.12 | 1.04 | 1.30 | 1.17 | 1.18 | 1.24 | 1.49 | 1.30 | 1.04 | 1.31 | 1.10 |
| May 2021    | 1.48 | 1.76 | 1.17 | 1.19 | 1.27 | 1.01 | 1.58 | 1.62 | 1.28 | 1.26 | 1.97 | 1.55 | 1.09 | 1.64 | 1.42 |
| Jun 2021    | 1.37 | 1.53 | 1.23 | 1.03 | 1.07 | 1.00 | 1.48 | 1.40 | 0.91 | 1.45 | 1.21 | 1.24 | 1.10 | 1.28 | 1.12 |
| Jul 2021    | 1.48 | 1.84 | 1.19 | 1.23 | 1.08 | 1.07 | 1.44 | 1.43 | 0.94 | 1.19 | 1.39 | 1.26 | 1.06 | 1.27 | 0.97 |
| Aug 2021    | 1.23 | 3.87 | 1.12 | 1.14 | 1.28 | 1.05 | 1.96 | 1.32 | 1.48 | 1.15 | 1.59 | 1.99 | 1.34 | 2.10 | 1.51 |
| Sep 2021    | 1.02 | 1.25 | 1.04 | 1.03 | 1.08 | 1.00 | 1.28 | 1.26 | 1.19 | 1.12 | 1.33 | 1.17 | 1.02 | 1.21 | 1.21 |
| Oct 2021    | 1.23 | 1.55 | 0.99 | 1.02 | 1.13 | 1.03 | 1.00 | 1.28 | 1.15 | 1.11 | 1.15 | 1.14 | 1.12 | 1.02 | 1.01 |
| Nov 2021    | 1.23 | 1.42 | 1.02 | 1.09 | 1.01 | 1.03 | 1.10 | 1.27 | 1.16 | 1.42 | 0.99 | 1.22 | 1.21 | 1.08 | 1.05 |
| Dec 2021    | 1.10 | 1.18 | 1.04 | 1.13 | 1.13 | 1.08 | 0.98 | 1.10 | 1.24 | 1.30 | 1.30 | 1.69 | 1.29 | 1.21 | 1.21 |
| Jan 2022    | 1.27 | 1.16 | 1.11 | 1.02 | 1.10 | 1.03 | 1.36 | 1.09 | 1.12 | 1.22 | 1.12 | 1.30 | 1.01 | 1.19 | 1.05 |
| Feb 2022    | 1.19 | 1.39 | 1.01 | 1.04 | 1.03 | 1.05 | 1.27 | 1.01 | 1.06 | 1.08 | 1.14 | 1.15 | 1.00 | 1.26 | 0.98 |

\*Before 11 March. \*\*Starting from 11 March.

Table C6: The Relative MAE of forecasting models for companies 76–90 listed in Table A1.

| Time period | 76   | 77   | 78   | 79   | 80   | 81   | 82   | 83   | 84   | 85   | 86   | 87   | 88   | 89   | 90   |
|-------------|------|------|------|------|------|------|------|------|------|------|------|------|------|------|------|
| 2010–2018   | 0.99 | 1.00 | 1.03 | 1.03 | 1.03 | 0.98 | 0.98 | 0.99 | 1.05 | 1.00 | 0.97 | 1.03 | 1.03 | 0.99 | 0.99 |
| Jan 2019    | 1.12 | 1.02 | 0.99 | 0.98 | 1.05 | 0.98 | 0.99 | 1.06 | 1.04 | 0.98 | 0.92 | 0.97 | 1.05 | 0.99 | 1.07 |
| Feb 2019    | 0.93 | 1.02 | 1.03 | 1.00 | 1.04 | 0.96 | 0.99 | 0.93 | 1.03 | 0.99 | 0.92 | 0.98 | 0.90 | 0.90 | 0.90 |
| Mar 2019    | 1.05 | 1.02 | 1.02 | 0.98 | 1.01 | 0.94 | 1.04 | 0.99 | 1.05 | 0.93 | 1.01 | 1.06 | 0.95 | 1.02 | 1.05 |
| Apr 2019    | 1.21 | 1.07 | 1.02 | 1.06 | 1.04 | 0.96 | 1.07 | 0.97 | 0.93 | 0.97 | 0.99 | 1.03 | 0.99 | 1.15 | 0.97 |
| May 2019    | 1.24 | 1.15 | 1.10 | 1.10 | 1.34 | 1.14 | 1.10 | 1.03 | 1.10 | 1.02 | 1.22 | 1.09 | 0.99 | 1.07 | 1.26 |
| Jun 2019    | 0.89 | 1.03 | 0.99 | 1.06 | 1.02 | 1.17 | 0.96 | 0.88 | 1.04 | 0.89 | 0.92 | 0.94 | 0.91 | 0.97 | 0.90 |
| Jul 2019    | 0.93 | 1.06 | 0.99 | 1.05 | 1.03 | 1.02 | 1.02 | 0.94 | 0.91 | 1.01 | 1.00 | 1.02 | 0.95 | 1.01 | 1.03 |
| Aug 2019    | 0.94 | 1.05 | 1.00 | 1.11 | 0.98 | 0.91 | 1.07 | 0.86 | 1.12 | 1.08 | 1.08 | 0.97 | 1.09 | 0.97 | 1.06 |
| Sep 2019    | 1.20 | 1.08 | 1.03 | 1.09 | 1.07 | 0.81 | 1.07 | 1.00 | 1.13 | 0.94 | 1.20 | 1.14 | 1.08 | 1.00 | 1.24 |
| Oct 2019    | 1.05 | 1.05 | 1.02 | 1.12 | 1.01 | 1.08 | 0.97 | 0.99 | 1.05 | 1.08 | 1.01 | 1.12 | 1.04 | 0.98 | 1.18 |
| Nov 2019    | 1.42 | 1.08 | 1.02 | 1.08 | 0.98 | 1.12 | 1.07 | 1.00 | 1.12 | 0.94 | 1.11 | 1.22 | 1.28 | 1.19 | 1.44 |
| Dec 2019    | 1.27 | 1.04 | 1.13 | 0.98 | 1.03 | 1.13 | 1.46 | 1.01 | 1.77 | 1.27 | 1.29 | 2.22 | 1.46 | 1.12 | 1.33 |
| Jan 2020    | 1.08 | 1.02 | 1.03 | 1.12 | 1.13 | 1.05 | 0.98 | 1.01 | 1.50 | 1.08 | 1.38 | 1.19 | 1.12 | 1.15 | 1.20 |
| Feb 2020    | 0.88 | 0.99 | 0.96 | 0.95 | 0.99 | 0.96 | 0.94 | 0.95 | 0.93 | 0.99 | 0.91 | 0.94 | 1.05 | 0.96 | 0.85 |
| Mar 2020*   | 1.19 | 0.77 | 0.90 | 0.78 | 0.97 | 0.89 | 1.08 | 0.91 | 1.00 | 0.93 | 0.89 | 0.90 | 0.89 | 0.85 | 0.82 |
| Mar 2020**  | 1.36 | 1.15 | 1.13 | 1.23 | 1.01 | 0.77 | 1.01 | 1.15 | 1.11 | 1.00 | 1.13 | 1.22 | 1.10 | 1.08 | 1.38 |
| Apr 2020    | 1.21 | 1.11 | 1.06 | 1.31 | 1.05 | 0.99 | 1.10 | 1.00 | 1.21 | 0.99 | 1.24 | 1.06 | 0.96 | 1.03 | 1.08 |
| May 2020    | 1.28 | 0.98 | 0.99 | 0.94 | 1.05 | 0.90 | 0.95 | 0.81 | 1.31 | 0.90 | 0.95 | 0.88 | 0.84 | 0.96 | 0.87 |
| Jun 2020    | 1.19 | 1.11 | 1.04 | 1.16 | 1.10 | 0.92 | 0.97 | 0.97 | 1.27 | 0.94 | 1.19 | 0.90 | 0.98 | 0.97 | 1.06 |
| Jul 2020    | 1.40 | 1.19 | 1.06 | 1.29 | 1.02 | 1.37 | 1.03 | 1.03 | 2.37 | 1.00 | 1.08 | 1.10 | 0.97 | 0.96 | 0.99 |
| Aug 2020    | 1.38 | 1.73 | 1.07 | 1.43 | 1.03 | 0.90 | 0.92 | 0.98 | 1.65 | 0.92 | 0.96 | 1.08 | 1.05 | 1.06 | 1.22 |
| Sep 2020    | 1.23 | 1.07 | 1.00 | 1.05 | 1.02 | 1.00 | 1.03 | 1.03 | 1.28 | 0.98 | 0.95 | 1.02 | 1.10 | 0.98 | 1.07 |
| Oct 2020    | 1.24 | 1.11 | 1.06 | 0.92 | 0.97 | 1.05 | 1.03 | 1.02 | 1.15 | 0.92 | 1.01 | 1.17 | 1.00 | 1.03 | 1.22 |
| Nov 2020    | 1.13 | 1.13 | 0.99 | 1.05 | 1.03 | 0.84 | 0.98 | 1.05 | 1.28 | 0.97 | 0.93 | 0.98 | 1.05 | 0.98 | 1.07 |
| Dec 2020    | 1.13 | 1.17 | 1.10 | 1.65 | 1.04 | 1.00 | 1.05 | 0.93 | 1.38 | 1.14 | 1.22 | 1.23 | 1.15 | 1.10 | 1.23 |
| Jan 2021    | 1.16 | 1.07 | 1.56 | 1.12 | 0.97 | 0.97 | 1.01 | 1.06 | 1.23 | 0.99 | 0.91 | 1.12 | 1.18 | 0.92 | 1.25 |
| Feb 2021    | 1.28 | 1.25 | 1.05 | 1.09 | 1.10 | 1.09 | 0.98 | 1.08 | 1.16 | 0.98 | 0.97 | 1.08 | 1.20 | 1.04 | 1.31 |
| Mar 2021    | 1.30 | 1.11 | 1.07 | 1.02 | 1.16 | 1.26 | 1.54 | 1.14 | 1.07 | 0.99 | 1.21 | 1.22 | 1.46 | 1.18 | 1.14 |
| Apr 2021    | 1.63 | 1.40 | 1.13 | 1.56 | 1.05 | 1.00 | 1.22 | 1.10 | 1.63 | 1.08 | 1.41 | 1.17 | 1.62 | 1.28 | 1.32 |
| May 2021    | 2.08 | 1.52 | 1.16 | 1.38 | 1.10 | 1.16 | 1.01 | 1.63 | 1.60 | 1.29 | 1.10 | 1.22 | 1.66 | 1.22 | 1.59 |
| Jun 2021    | 1.26 | 1.24 | 1.15 | 1.26 | 0.89 | 0.84 | 1.01 | 1.01 | 1.35 | 0.90 | 1.11 | 1.02 | 1.35 | 1.05 | 1.32 |
| Jul 2021    | 2.28 | 1.30 | 1.13 | 1.55 | 0.99 | 1.12 | 0.99 | 1.06 | 1.80 | 0.91 | 1.07 | 1.23 | 1.38 | 1.01 | 1.14 |
| Aug 2021    | 2.02 | 2.07 | 1.25 | 1.68 | 1.28 | 1.57 | 1.43 | 2.47 | 2.68 | 1.14 | 1.60 | 1.21 | 1.90 | 1.39 | 2.09 |
| Sep 2021    | 1.35 | 1.16 | 1.21 | 1.24 | 1.00 | 1.07 | 1.39 | 1.43 | 1.19 | 1.08 | 1.26 | 1.18 | 1.31 | 1.21 | 1.33 |
| Oct 2021    | 1.86 | 1.29 | 0.99 | 1.34 | 1.13 | 1.21 | 1.04 | 0.96 | 0.99 | 1.26 | 1.12 | 1.32 | 1.48 | 1.16 | 1.22 |
| Nov 2021    | 1.09 | 1.06 | 1.03 | 1.22 | 1.05 | 1.19 | 0.96 | 0.89 | 0.94 | 1.12 | 1.27 | 1.22 | 1.07 | 1.02 | 1.17 |
| Dec 2021    | 1.70 | 1.15 | 1.13 | 1.16 | 1.08 | 1.69 | 0.96 | 1.22 | 1.19 | 1.16 | 1.09 | 1.03 | 1.53 | 1.21 | 1.02 |
| Jan 2022    | 1.30 | 1.22 | 1.01 | 1.29 | 1.03 | 0.96 | 1.07 | 1.01 | 1.19 | 1.04 | 1.10 | 1.03 | 1.05 | 1.07 | 1.14 |
| Feb 2022    | 1.25 | 1.22 | 1.00 | 1.18 | 1.01 | 1.01 | 0.99 | 1.04 | 1.13 | 0.99 | 1.04 | 1.00 | 1.17 | 1.03 | 1.14 |

\*Before 11 March. \*\*Starting from 11 March.

### D. The Relative MAPE Values for All Models

Table D1: The Relative MAPE of forecasting models for companies 1–15 listed in Table A1.

| Time period | 1    | 2    | 3    | 4    | 5    | 6    | 7    | 8    | 9    | 10   | 11   | 12   | 13   | 14   | 15   |
|-------------|------|------|------|------|------|------|------|------|------|------|------|------|------|------|------|
| 2010–2018   | 1.03 | 1.00 | 1.04 | 0.99 | 1.08 | 0.99 | 1.04 | 1.03 | 1.03 | 1.04 | 0.99 | 1.03 | 1.06 | 1.00 | 0.99 |
| Jan 2019    | 1.00 | 1.03 | 1.19 | 0.94 | 0.94 | 0.99 | 0.98 | 1.02 | 1.05 | 0.95 | 1.03 | 1.04 | 1.05 | 0.99 | 0.92 |
| Feb 2019    | 1.02 | 0.99 | 1.04 | 1.01 | 1.00 | 0.92 | 0.90 | 0.94 | 0.96 | 1.09 | 0.92 | 0.94 | 1.04 | 0.92 | 0.99 |
| Mar 2019    | 0.98 | 0.99 | 0.96 | 0.95 | 1.13 | 1.01 | 0.93 | 0.93 | 0.95 | 1.09 | 0.95 | 0.96 | 1.02 | 0.94 | 0.94 |
| Apr 2019    | 1.03 | 1.00 | 1.01 | 1.07 | 0.99 | 0.98 | 1.01 | 0.92 | 1.01 | 1.03 | 1.00 | 0.96 | 0.99 | 1.05 | 1.04 |
| May 2019    | 1.05 | 1.04 | 1.15 | 1.03 | 1.31 | 1.05 | 1.04 | 1.03 | 1.00 | 1.20 | 1.08 | 1.08 | 1.19 | 1.11 | 1.08 |
| Jun 2019    | 0.88 | 0.96 | 0.97 | 0.95 | 1.16 | 0.97 | 1.01 | 0.90 | 0.90 | 0.98 | 0.92 | 0.96 | 1.02 | 0.98 | 1.03 |
| Jul 2019    | 0.93 | 0.96 | 1.19 | 0.99 | 1.17 | 0.99 | 1.06 | 0.99 | 0.99 | 1.08 | 0.93 | 1.06 | 1.06 | 1.00 | 0.99 |
| Aug 2019    | 1.00 | 1.00 | 1.04 | 1.13 | 1.10 | 1.04 | 1.05 | 0.89 | 1.08 | 1.03 | 0.95 | 1.14 | 1.13 | 0.98 | 0.98 |
| Sep 2019    | 1.02 | 0.99 | 1.09 | 0.93 | 0.83 | 0.94 | 1.04 | 1.15 | 1.06 | 1.01 | 0.99 | 1.07 | 1.16 | 1.10 | 0.94 |
| Oct 2019    | 1.03 | 0.97 | 1.14 | 0.99 | 0.91 | 0.94 | 1.02 | 1.04 | 1.02 | 1.05 | 0.94 | 1.05 | 1.09 | 0.97 | 1.02 |
| Nov 2019    | 1.23 | 1.03 | 1.27 | 1.01 | 1.00 | 1.03 | 1.08 | 1.12 | 1.02 | 1.25 | 1.11 | 1.02 | 2.41 | 1.11 | 1.08 |
| Dec 2019    | 1.10 | 1.10 | 1.17 | 1.17 | 1.01 | 1.09 | 1.07 | 1.18 | 0.97 | 1.24 | 1.12 | 1.08 | 1.45 | 1.16 | 2.25 |
| Jan 2020    | 1.01 | 1.01 | 1.07 | 1.03 | 1.01 | 1.06 | 1.04 | 1.09 | 1.10 | 1.03 | 1.02 | 1.12 | 1.23 | 1.33 | 1.23 |
| Feb 2020    | 0.96 | 0.99 | 1.01 | 0.99 | 1.00 | 0.93 | 0.96 | 0.92 | 0.98 | 0.92 | 0.95 | 1.02 | 0.92 | 0.91 | 0.92 |
| Mar 2020*   | 1.02 | 0.96 | 0.97 | 0.90 | 1.03 | 0.94 | 0.94 | 0.88 | 0.85 | 0.88 | 0.98 | 0.96 | 0.88 | 1.08 | 1.12 |
| Mar 2020**  | 0.91 | 0.92 | 1.04 | 1.10 | 1.27 | 1.01 | 1.08 | 1.23 | 1.16 | 1.19 | 1.13 | 1.15 | 1.09 | 1.12 | 1.13 |
| Apr 2020    | 1.03 | 0.99 | 1.02 | 1.08 | 1.20 | 1.14 | 1.13 | 1.03 | 1.08 | 1.12 | 1.06 | 0.97 | 1.09 | 1.06 | 0.99 |
| May 2020    | 0.92 | 0.94 | 1.15 | 1.28 | 1.12 | 0.89 | 0.89 | 0.88 | 0.88 | 0.75 | 0.99 | 1.12 | 0.96 | 0.96 | 0.96 |
| Jun 2020    | 1.00 | 0.97 | 1.02 | 1.01 | 1.20 | 1.02 | 0.98 | 1.01 | 1.07 | 1.15 | 1.04 | 1.22 | 0.98 | 1.02 | 0.96 |
| Jul 2020    | 1.03 | 1.01 | 1.30 | 1.07 | 0.98 | 1.05 | 1.06 | 1.05 | 1.03 | 1.27 | 1.10 | 0.96 | 1.18 | 1.13 | 1.20 |
| Aug 2020    | 1.02 | 1.07 | 1.15 | 1.07 | 1.47 | 1.07 | 0.94 | 1.02 | 1.27 | 1.29 | 1.14 | 1.48 | 1.05 | 0.98 | 1.04 |
| Sep 2020    | 0.98 | 0.93 | 1.08 | 1.14 | 1.16 | 0.97 | 0.97 | 0.95 | 1.14 | 0.99 | 1.01 | 1.06 | 1.03 | 0.90 | 0.97 |
| Oct 2020    | 0.93 | 1.02 | 1.12 | 0.97 | 1.03 | 0.95 | 0.99 | 0.95 | 0.86 | 1.03 | 1.11 | 1.07 | 0.98 | 1.04 | 1.05 |
| Nov 2020    | 0.95 | 1.00 | 1.42 | 0.99 | 1.17 | 0.86 | 1.02 | 1.07 | 1.14 | 1.01 | 1.03 | 1.04 | 1.08 | 1.01 | 1.04 |
| Dec 2020    | 0.99 | 1.04 | 1.34 | 0.97 | 1.27 | 1.03 | 1.02 | 1.15 | 1.13 | 1.26 | 1.06 | 1.68 | 1.17 | 1.34 | 1.26 |
| Jan 2021    | 0.94 | 1.03 | 1.13 | 0.98 | 1.08 | 1.18 | 1.06 | 1.00 | 1.09 | 1.06 | 1.10 | 1.22 | 1.00 | 1.09 | 1.56 |
| Feb 2021    | 0.96 | 1.14 | 1.83 | 1.07 | 0.93 | 1.21 | 1.09 | 0.99 | 0.93 | 1.00 | 1.13 | 1.20 | 1.02 | 1.18 | 1.03 |
| Mar 2021    | 0.95 | 1.00 | 1.09 | 1.31 | 1.17 | 0.99 | 1.15 | 1.09 | 1.54 | 1.06 | 1.13 | 1.20 | 1.14 | 1.18 | 1.16 |
| Apr 2021    | 1.04 | 0.97 | 1.18 | 1.40 | 1.71 | 1.18 | 1.10 | 1.25 | 1.30 | 1.26 | 1.16 | 1.08 | 1.06 | 1.13 | 1.46 |
| May 2021    | 1.18 | 1.22 | 1.19 | 1.54 | 1.29 | 1.23 | 1.44 | 1.26 | 2.29 | 1.26 | 1.32 | 1.18 | 1.12 | 1.06 | 1.49 |
| Jun 2021    | 0.89 | 0.97 | 0.98 | 1.33 | 1.08 | 1.20 | 1.09 | 0.94 | 1.22 | 1.10 | 1.36 | 1.17 | 1.17 | 0.92 | 1.08 |
| Jul 2021    | 1.13 | 1.02 | 1.08 | 1.15 | 1.62 | 1.48 | 1.18 | 1.14 | 1.41 | 1.26 | 1.28 | 0.82 | 0.97 | 1.45 | 0.98 |
| Aug 2021    | 1.06 | 1.45 | 1.26 | 1.68 | 1.99 | 1.78 | 1.51 | 1.65 | 1.72 | 1.62 | 1.81 | 1.22 | 1.89 | 1.25 | 1.22 |
| Sep 2021    | 1.12 | 1.07 | 1.20 | 1.12 | 1.46 | 1.20 | 1.08 | 1.15 | 1.22 | 1.19 | 1.45 | 1.00 | 1.32 | 1.13 | 1.07 |
| Oct 2021    | 1.12 | 1.02 | 1.10 | 1.06 | 1.10 | 1.07 | 1.05 | 1.11 | 1.35 | 1.11 | 1.16 | 1.87 | 1.02 | 1.16 | 1.02 |
| Nov 2021    | 1.03 | 0.87 | 1.24 | 1.27 | 1.21 | 1.03 | 1.07 | 1.31 | 1.23 | 1.01 | 0.97 | 1.46 | 1.14 | 1.13 | 1.12 |
| Dec 2021    | 1.05 | 1.00 | 1.11 | 1.04 | 1.20 | 1.00 | 0.88 | 1.10 | 1.42 | 1.36 | 1.19 | 1.81 | 1.10 | 1.08 | 1.06 |
| Jan 2022    | 1.08 | 1.10 | 1.07 | 1.15 | 1.01 | 1.18 | 1.09 | 1.04 | 1.11 | 1.13 | 1.11 | 1.17 | 1.05 | 0.99 | 1.04 |
| Feb 2022    | 1.00 | 1.02 | 1.04 | 1.05 | 1.06 | 1.17 | 1.01 | 1.04 | 1.27 | 1.06 | 1.12 | 1.00 | 1.02 | 0.96 | 0.98 |

\*Before 11 March. \*\*Starting from 11 March.

Table D2: The Relative MAPE of forecasting models for companies 16–30 listed in Table A1.

| Time period | 16   | 17   | 18   | 19    | 20   | 21    | 22   | 23   | 24   | 25   | 26   | 27   | 28   | 29   | 30   |
|-------------|------|------|------|-------|------|-------|------|------|------|------|------|------|------|------|------|
| 2010–2018   | 1.01 | 1.00 | 1.02 | 1.08  | 0.99 | 1.03  | 1.00 | 1.03 | 0.99 | 1.01 | 1.05 | 1.02 | 1.02 | 1.00 | 0.99 |
| Jan 2019    | 0.97 | 1.02 | 1.00 | 1.10  | 1.02 | 1.09  | 1.01 | 1.00 | 0.97 | 0.97 | 1.13 | 1.01 | 1.00 | 1.15 | 1.05 |
| Feb 2019    | 1.00 | 0.90 | 0.88 | 1.13  | 0.91 | 0.96  | 0.91 | 1.01 | 1.00 | 0.97 | 1.01 | 0.97 | 0.99 | 0.95 | 0.92 |
| Mar 2019    | 1.00 | 0.96 | 1.04 | 1.08  | 1.03 | 1.00  | 0.90 | 1.03 | 0.96 | 0.98 | 0.96 | 1.02 | 0.97 | 0.94 | 0.99 |
| Apr 2019    | 1.03 | 0.99 | 0.94 | 1.16  | 0.94 | 1.03  | 1.04 | 1.03 | 1.13 | 0.99 | 1.24 | 1.08 | 1.05 | 1.21 | 1.03 |
| May 2019    | 1.24 | 1.05 | 1.09 | 1.03  | 1.09 | 1.07  | 1.04 | 1.09 | 1.06 | 1.04 | 1.07 | 1.09 | 1.14 | 1.45 | 1.11 |
| Jun 2019    | 1.04 | 0.97 | 0.96 | 1.01  | 0.88 | 1.01  | 0.91 | 0.94 | 0.95 | 1.02 | 0.91 | 0.99 | 0.99 | 0.88 | 0.78 |
| Jul 2019    | 1.06 | 0.99 | 1.06 | 1.03  | 0.97 | 1.01  | 0.95 | 1.02 | 0.97 | 1.19 | 1.00 | 0.96 | 1.02 | 0.94 | 0.90 |
| Aug 2019    | 1.03 | 1.02 | 1.09 | 1.17  | 1.03 | 1.03  | 0.99 | 1.00 | 1.02 | 1.07 | 0.98 | 1.07 | 1.10 | 0.90 | 0.98 |
| Sep 2019    | 1.01 | 0.96 | 1.05 | 1.18  | 1.04 | 1.01  | 0.93 | 1.05 | 1.05 | 1.05 | 1.00 | 1.11 | 1.09 | 1.22 | 1.08 |
| Oct 2019    | 1.03 | 1.00 | 1.18 | 1.18  | 1.18 | 0.94  | 1.02 | 1.03 | 1.00 | 1.03 | 1.05 | 1.09 | 1.08 | 1.47 | 1.06 |
| Nov 2019    | 1.00 | 0.93 | 1.07 | 2.68  | 1.01 | 1.05  | 1.04 | 1.06 | 1.04 | 0.94 | 1.04 | 1.17 | 1.23 | 1.28 | 1.15 |
| Dec 2019    | 1.31 | 0.99 | 1.49 | 1.62  | 1.11 | 1.09  | 1.03 | 1.12 | 0.97 | 1.10 | 0.99 | 1.12 | 1.08 | 1.69 | 1.14 |
| Jan 2020    | 1.02 | 1.03 | 1.07 | 5.99  | 1.22 | 1.06  | 1.06 | 1.07 | 1.01 | 0.98 | 1.05 | 1.10 | 1.15 | 1.28 | 0.92 |
| Feb 2020    | 0.97 | 0.91 | 0.96 | 1.16  | 0.98 | 1.00  | 0.92 | 1.01 | 0.90 | 0.93 | 1.03 | 0.95 | 0.93 | 0.74 | 0.94 |
| Mar 2020*   | 1.02 | 0.90 | 0.91 | 0.94  | 0.94 | 1.08  | 0.93 | 0.89 | 1.01 | 1.11 | 1.04 | 0.85 | 0.86 | 0.87 | 0.83 |
| Mar 2020**  | 1.03 | 1.11 | 1.23 | 1.20  | 1.06 | 1.29  | 1.06 | 1.04 | 1.12 | 1.01 | 1.06 | 1.21 | 1.20 | 1.46 | 1.21 |
| Apr 2020    | 1.10 | 1.11 | 1.04 | 1.12  | 0.94 | 1.07  | 1.16 | 1.05 | 1.08 | 0.94 | 1.12 | 1.13 | 1.14 | 1.26 | 1.12 |
| May 2020    | 1.31 | 0.85 | 0.95 | 1.10  | 0.87 | 1.30  | 1.02 | 0.95 | 0.98 | 1.16 | 1.06 | 1.00 | 1.00 | 0.87 | 0.98 |
| Jun 2020    | 1.07 | 1.14 | 0.92 | 1.07  | 0.98 | 1.10  | 1.11 | 1.07 | 1.10 | 1.05 | 1.05 | 1.07 | 1.21 | 1.19 | 1.05 |
| Jul 2020    | 1.11 | 1.22 | 1.04 | 1.06  | 0.98 | 1.45  | 1.22 | 1.11 | 1.18 | 1.11 | 0.98 | 1.24 | 1.12 | 1.25 | 0.96 |
| Aug 2020    | 0.99 | 1.10 | 0.98 | 1.20  | 0.95 | 1.25  | 1.54 | 1.05 | 1.12 | 1.01 | 1.04 | 1.64 | 1.19 | 1.41 | 0.96 |
| Sep 2020    | 0.95 | 1.04 | 0.95 | 1.19  | 0.93 | 1.13  | 1.07 | 0.98 | 1.07 | 0.98 | 1.06 | 1.07 | 1.01 | 1.13 | 0.96 |
| Oct 2020    | 1.12 | 1.01 | 1.04 | 1.30  | 0.94 | 1.13  | 1.09 | 1.10 | 0.99 | 1.21 | 1.04 | 1.22 | 1.01 | 1.25 | 0.89 |
| Nov 2020    | 0.97 | 1.06 | 0.99 | 1.12  | 1.03 | 1.01  | 1.05 | 1.02 | 0.95 | 1.09 | 1.06 | 1.15 | 1.05 | 1.19 | 0.94 |
| Dec 2020    | 1.27 | 1.10 | 1.10 | 11.59 | 1.02 | 1.04  | 1.11 | 1.14 | 1.08 | 1.09 | 1.24 | 1.26 | 1.25 | 1.49 | 0.89 |
| Jan 2021    | 1.08 | 1.08 | 0.94 | 1.26  | 1.00 | 0.98  | 1.09 | 1.53 | 1.14 | 0.88 | 2.24 | 0.97 | 1.15 | 1.06 | 1.02 |
| Feb 2021    | 1.01 | 1.08 | 1.11 | 1.23  | 0.93 | 1.15  | 1.07 | 1.12 | 0.95 | 1.21 | 2.34 | 1.12 | 1.09 | 1.54 | 0.93 |
| Mar 2021    | 1.18 | 1.09 | 1.02 | 1.39  | 1.08 | 1.29  | 1.18 | 1.09 | 1.05 | 0.91 | 1.34 | 1.10 | 1.13 | 1.58 | 1.12 |
| Apr 2021    | 1.39 | 1.23 | 1.19 | 2.12  | 1.31 | 1.18  | 1.27 | 1.15 | 1.20 | 1.07 | 1.24 | 1.56 | 1.35 | 1.44 | 1.02 |
| May 2021    | 1.37 | 1.52 | 1.76 | 2.66  | 1.22 | 1.39  | 1.36 | 1.10 | 1.48 | 1.49 | 1.45 | 1.31 | 1.22 | 2.26 | 1.27 |
| Jun 2021    | 1.07 | 1.15 | 1.00 | 2.84  | 0.85 | 1.64  | 1.32 | 1.06 | 1.27 | 1.13 | 1.13 | 1.75 | 1.08 | 1.81 | 1.02 |
| Jul 2021    | 1.18 | 2.04 | 1.06 | 1.58  | 1.02 | 17.69 | 1.20 | 1.00 | 2.08 | 1.13 | 1.32 | 1.52 | 1.51 | 2.79 | 1.02 |
| Aug 2021    | 1.96 | 1.98 | 1.82 | 3.53  | 1.25 | 4.96  | 2.49 | 1.10 | 2.97 | 1.25 | 1.41 | 0.98 | 1.36 | 2.28 | 1.41 |
| Sep 2021    | 1.30 | 1.08 | 1.08 | 2.43  | 1.23 | 2.08  | 1.21 | 1.11 | 1.07 | 1.14 | 1.17 | 1.04 | 1.14 | 1.54 | 1.25 |
| Oct 2021    | 1.34 | 1.48 | 0.95 | 1.60  | 1.02 | 2.07  | 1.03 | 1.09 | 1.10 | 1.00 | 1.18 | 1.25 | 1.24 | 1.58 | 0.99 |
| Nov 2021    | 1.06 | 1.08 | 1.10 | 1.93  | 0.86 | 2.40  | 1.15 | 1.04 | 1.12 | 0.92 | 1.05 | 1.13 | 1.15 | 1.44 | 1.40 |
| Dec 2021    | 1.25 | 1.17 | 1.10 | 1.72  | 1.04 | 1.39  | 1.15 | 1.04 | 1.13 | 1.04 | 1.54 | 1.78 | 1.06 | 1.44 | 1.15 |
| Jan 2022    | 1.13 | 1.28 | 1.01 | 1.08  | 1.11 | 1.32  | 1.28 | 1.11 | 1.22 | 1.12 | 1.05 | 1.22 | 1.19 | 1.38 | 0.94 |
| Feb 2022    | 1.02 | 1.35 | 1.05 | 0.95  | 1.00 | 1.31  | 1.28 | 1.02 | 1.29 | 1.26 | 0.96 | 1.21 | 1.17 | 1.47 | 0.99 |

\*Before 11 March. \*\*Starting from 11 March.



Table D3: The Relative MAPE of forecasting models for companies 31–45 listed in Table A1.

| Time period | 31   | 32   | 33   | 34   | 35   | 36   | 37   | 38   | 39   | 40   | 41   | 42   | 43   | 44   | 45    |
|-------------|------|------|------|------|------|------|------|------|------|------|------|------|------|------|-------|
| 2010–2018   | 1.05 | 1.03 | 1.00 | 1.01 | 1.06 | 1.03 | 1.07 | 1.01 | 1.00 | 1.00 | 1.07 | 1.00 | 1.07 | 1.03 | 1.11  |
| Jan 2019    | 0.96 | 0.98 | 1.03 | 1.03 | 0.90 | 1.01 | 1.10 | 0.99 | 1.02 | 1.21 | 1.01 | 0.98 | 1.08 | 1.00 | 1.04  |
| Feb 2019    | 0.92 | 1.10 | 0.86 | 0.95 | 1.09 | 0.96 | 0.94 | 0.99 | 0.89 | 0.90 | 0.98 | 0.94 | 1.09 | 0.92 | 2.40  |
| Mar 2019    | 1.00 | 1.01 | 0.93 | 1.05 | 0.95 | 1.03 | 1.01 | 1.01 | 0.99 | 1.10 | 0.99 | 1.00 | 1.10 | 1.02 | 1.22  |
| Apr 2019    | 1.02 | 1.03 | 1.00 | 0.99 | 1.07 | 1.09 | 1.07 | 0.99 | 0.95 | 1.02 | 1.05 | 1.08 | 1.02 | 0.99 | 5.03  |
| May 2019    | 1.12 | 1.26 | 1.03 | 1.15 | 1.09 | 1.14 | 1.07 | 1.04 | 1.06 | 1.11 | 1.05 | 1.06 | 1.18 | 1.15 | 1.75  |
| Jun 2019    | 1.01 | 1.01 | 0.91 | 1.04 | 1.13 | 0.88 | 0.86 | 0.98 | 0.91 | 0.94 | 1.00 | 0.93 | 1.00 | 0.96 | 1.12  |
| Jul 2019    | 0.96 | 1.19 | 0.89 | 1.01 | 1.08 | 1.00 | 0.97 | 0.98 | 0.99 | 1.03 | 1.01 | 1.02 | 1.04 | 0.98 | 1.11  |
| Aug 2019    | 1.00 | 1.04 | 0.93 | 1.05 | 1.15 | 1.00 | 0.96 | 1.03 | 0.99 | 1.12 | 1.06 | 1.03 | 1.22 | 1.06 | 1.20  |
| Sep 2019    | 1.13 | 1.09 | 1.13 | 0.92 | 1.21 | 1.01 | 0.96 | 0.99 | 0.98 | 1.19 | 1.05 | 1.08 | 1.27 | 1.08 | 1.18  |
| Oct 2019    | 1.17 | 0.99 | 1.13 | 1.14 | 1.06 | 1.07 | 1.03 | 0.96 | 0.99 | 1.01 | 1.02 | 1.16 | 1.02 | 1.03 | 1.18  |
| Nov 2019    | 1.10 | 1.06 | 1.11 | 1.05 | 1.28 | 1.34 | 1.01 | 0.99 | 1.06 | 1.32 | 1.06 | 1.16 | 1.11 | 1.22 | 1.34  |
| Dec 2019    | 1.05 | 1.08 | 1.20 | 1.23 | 1.31 | 1.17 | 0.98 | 0.99 | 1.11 | 1.16 | 1.21 | 1.58 | 1.12 | 1.07 | 1.34  |
| Jan 2020    | 1.15 | 1.27 | 1.01 | 1.19 | 1.15 | 1.01 | 1.05 | 1.06 | 1.03 | 1.20 | 1.04 | 1.18 | 1.21 | 1.19 | 1.15  |
| Feb 2020    | 0.97 | 0.94 | 0.90 | 0.94 | 0.95 | 0.91 | 0.96 | 0.96 | 0.94 | 1.11 | 0.97 | 0.93 | 1.05 | 0.97 | 1.23  |
| Mar 2020*   | 0.92 | 0.83 | 1.01 | 0.94 | 0.95 | 0.86 | 0.83 | 1.01 | 0.93 | 0.90 | 1.01 | 0.98 | 1.00 | 0.90 | 1.07  |
| Mar 2020**  | 1.09 | 1.02 | 1.02 | 1.25 | 1.18 | 1.17 | 1.13 | 1.00 | 1.22 | 1.08 | 1.00 | 1.17 | 1.04 | 1.04 | 1.19  |
| Apr 2020    | 1.02 | 1.17 | 1.07 | 1.04 | 0.99 | 1.16 | 1.27 | 1.02 | 1.07 | 1.16 | 1.09 | 1.11 | 0.96 | 1.20 | 1.08  |
| May 2020    | 0.95 | 0.86 | 1.29 | 0.96 | 1.03 | 1.02 | 1.53 | 0.92 | 0.91 | 0.88 | 1.05 | 1.00 | 0.96 | 0.94 | 1.32  |
| Jun 2020    | 0.96 | 1.16 | 1.27 | 0.94 | 0.99 | 1.12 | 1.05 | 0.99 | 0.95 | 0.96 | 1.06 | 1.22 | 0.99 | 1.02 | 1.07  |
| Jul 2020    | 1.02 | 1.48 | 1.25 | 1.06 | 1.00 | 1.00 | 0.99 | 1.02 | 0.98 | 1.40 | 1.25 | 1.13 | 1.04 | 1.08 | 1.31  |
| Aug 2020    | 1.03 | 1.55 | 2.10 | 0.99 | 1.04 | 1.09 | 1.04 | 1.02 | 0.99 | 1.08 | 1.12 | 1.39 | 1.10 | 1.11 | 3.62  |
| Sep 2020    | 0.97 | 1.03 | 1.13 | 0.94 | 1.03 | 0.96 | 1.10 | 0.93 | 0.91 | 1.10 | 0.97 | 1.03 | 1.00 | 1.09 | 1.22  |
| Oct 2020    | 0.97 | 1.01 | 1.01 | 1.04 | 0.96 | 0.97 | 0.99 | 1.03 | 0.91 | 1.36 | 1.00 | 1.19 | 0.99 | 1.07 | 1.12  |
| Nov 2020    | 1.01 | 1.02 | 1.15 | 0.98 | 1.04 | 1.00 | 0.56 | 1.01 | 0.98 | 1.29 | 0.98 | 1.06 | 0.97 | 1.01 | 1.04  |
| Dec 2020    | 1.12 | 1.05 | 1.60 | 1.26 | 1.25 | 1.07 | 0.92 | 1.02 | 1.07 | 1.26 | 1.01 | 1.22 | 1.02 | 1.10 | 1.37  |
| Jan 2021    | 1.27 | 1.01 | 1.35 | 0.94 | 0.99 | 1.03 | 1.16 | 1.02 | 0.87 | 1.00 | 0.98 | 1.70 | 1.01 | 1.12 | 1.80  |
| Feb 2021    | 1.16 | 1.09 | 1.17 | 1.01 | 1.01 | 0.94 | 1.32 | 0.99 | 1.59 | 1.10 | 1.08 | 1.12 | 1.01 | 1.07 | 1.13  |
| Mar 2021    | 1.14 | 1.07 | 1.32 | 1.02 | 1.19 | 1.07 | 1.15 | 1.01 | 1.20 | 1.04 | 1.05 | 1.09 | 0.96 | 1.11 | 2.87  |
| Apr 2021    | 1.10 | 1.59 | 1.87 | 1.22 | 1.14 | 1.16 | 1.21 | 1.11 | 1.05 | 1.56 | 1.08 | 1.64 | 1.10 | 1.09 | 1.41  |
| May 2021    | 1.31 | 1.58 | 1.67 | 1.14 | 1.14 | 1.31 | 1.28 | 1.05 | 1.69 | 1.50 | 1.44 | 2.18 | 0.97 | 1.14 | 41.65 |
| Jun 2021    | 1.14 | 1.31 | 1.54 | 0.93 | 0.94 | 1.09 | 1.17 | 1.03 | 1.44 | 1.79 | 1.03 | 1.39 | 1.07 | 1.09 | 31.11 |
| Jul 2021    | 1.06 | 1.49 | 1.34 | 0.93 | 1.34 | 1.24 | 1.31 | 1.25 | 1.33 | 1.57 | 1.06 | 1.51 | 0.97 | 0.92 | 62.35 |
| Aug 2021    | 1.20 | 1.66 | 1.89 | 1.50 | 2.37 | 1.27 | 1.58 | 1.59 | 1.92 | 1.98 | 1.16 | 1.51 | 1.02 | 1.17 | 3.39  |
| Sep 2021    | 1.10 | 1.09 | 1.32 | 1.15 | 1.08 | 1.17 | 1.29 | 1.10 | 1.23 | 1.59 | 1.08 | 1.07 | 0.98 | 1.16 | 1.12  |
| Oct 2021    | 1.13 | 1.65 | 1.11 | 1.10 | 1.15 | 1.11 | 1.20 | 1.04 | 0.94 | 0.97 | 0.95 | 1.01 | 1.01 | 1.16 | 1.71  |
| Nov 2021    | 1.22 | 1.18 | 1.28 | 1.10 | 1.07 | 1.47 | 1.03 | 0.98 | 1.17 | 1.18 | 1.01 | 1.15 | 1.01 | 1.11 | 1.37  |
| Dec 2021    | 1.17 | 0.98 | 1.18 | 1.05 | 1.15 | 1.15 | 0.96 | 0.97 | 1.08 | 1.33 | 1.09 | 1.15 | 0.98 | 1.19 | 2.43  |
| Jan 2022    | 1.03 | 1.16 | 1.24 | 1.11 | 1.11 | 1.07 | 1.50 | 1.07 | 1.01 | 1.35 | 1.08 | 1.20 | 0.98 | 1.07 | 1.32  |
| Feb 2022    | 1.00 | 1.15 | 1.48 | 1.03 | 0.95 | 1.01 | 1.17 | 1.06 | 1.01 | 1.06 | 1.01 | 1.20 | 0.93 | 1.01 | 0.99  |

\*Before 11 March. \*\*Starting from 11 March.

Table D4: The Relative MAPE of forecasting models for companies 46–60 listed in Table A1.

| Time period | 46   | 47   | 48   | 49   | 50   | 51   | 52   | 53   | 54   | 55   | 56    | 57   | 58   | 59   | 60   |
|-------------|------|------|------|------|------|------|------|------|------|------|-------|------|------|------|------|
| 2010–2018   | 1.04 | 1.04 | 1.03 | 1.03 | 1.04 | 1.05 | 1.02 | 1.01 | 1.01 | 1.01 | 1.07  | 1.05 | 0.98 | 1.03 | 1.03 |
| Jan 2019    | 0.97 | 0.98 | 1.05 | 1.07 | 1.08 | 2.57 | 1.01 | 0.94 | 1.02 | 1.07 | 1.00  | 0.97 | 1.05 | 1.07 | 0.93 |
| Feb 2019    | 0.99 | 0.86 | 1.02 | 0.98 | 0.90 | 1.36 | 0.94 | 0.94 | 1.03 | 0.93 | 0.97  | 1.06 | 1.02 | 0.93 | 0.95 |
| Mar 2019    | 0.96 | 0.98 | 1.05 | 0.96 | 0.99 | 1.12 | 0.99 | 0.95 | 1.02 | 1.01 | 1.02  | 1.07 | 1.08 | 1.05 | 1.05 |
| Apr 2019    | 1.01 | 0.99 | 1.02 | 0.99 | 0.97 | 1.01 | 1.03 | 1.03 | 0.99 | 1.04 | 1.81  | 1.20 | 1.11 | 1.09 | 1.06 |
| May 2019    | 1.01 | 1.04 | 1.11 | 1.18 | 0.99 | 2.09 | 1.07 | 1.15 | 1.05 | 1.07 | 1.34  | 1.11 | 1.13 | 1.12 | 1.20 |
| Jun 2019    | 0.95 | 1.00 | 0.96 | 1.08 | 0.95 | 1.09 | 0.98 | 1.04 | 0.99 | 0.87 | 0.99  | 1.04 | 0.99 | 0.90 | 0.94 |
| Jul 2019    | 1.00 | 1.11 | 0.95 | 1.02 | 0.99 | 1.26 | 0.96 | 1.04 | 0.99 | 1.07 | 1.13  | 1.14 | 1.06 | 1.13 | 0.90 |
| Aug 2019    | 1.01 | 1.04 | 1.00 | 1.07 | 0.91 | 1.04 | 1.17 | 1.07 | 1.00 | 1.12 | 1.14  | 1.08 | 1.11 | 0.94 | 0.94 |
| Sep 2019    | 0.97 | 1.04 | 0.93 | 1.05 | 1.05 | 1.07 | 1.07 | 1.05 | 1.02 | 1.07 | 1.12  | 1.12 | 1.05 | 1.21 | 1.14 |
| Oct 2019    | 1.01 | 1.03 | 1.07 | 1.00 | 1.00 | 1.45 | 1.00 | 1.01 | 1.04 | 1.10 | 1.21  | 1.07 | 1.03 | 1.16 | 1.18 |
| Nov 2019    | 1.00 | 1.01 | 1.07 | 1.02 | 1.05 | 1.70 | 0.94 | 1.21 | 1.01 | 1.29 | 1.21  | 1.19 | 1.10 | 1.07 | 1.05 |
| Dec 2019    | 1.02 | 1.06 | 1.38 | 1.11 | 1.16 | 0.97 | 1.23 | 1.03 | 1.02 | 1.38 | 1.27  | 1.28 | 1.21 | 1.27 | 1.08 |
| Jan 2020    | 1.03 | 1.12 | 1.19 | 1.15 | 1.02 | 1.26 | 1.05 | 0.97 | 1.07 | 1.20 | 1.63  | 1.10 | 1.08 | 1.25 | 1.12 |
| Feb 2020    | 0.97 | 0.95 | 0.86 | 0.98 | 0.97 | 1.32 | 0.94 | 0.96 | 0.98 | 0.95 | 1.63  | 0.92 | 0.92 | 0.99 | 0.91 |
| Mar 2020*   | 0.95 | 1.07 | 0.98 | 0.98 | 0.90 | 1.33 | 0.99 | 0.95 | 1.00 | 1.05 | 3.05  | 1.01 | 1.07 | 1.01 | 1.03 |
| Mar 2020**  | 1.06 | 1.08 | 0.88 | 1.10 | 1.14 | 1.80 | 1.16 | 1.06 | 0.98 | 1.19 | 2.44  | 1.12 | 1.26 | 1.11 | 1.15 |
| Apr 2020    | 1.04 | 1.07 | 1.04 | 1.03 | 1.03 | 1.59 | 1.05 | 0.93 | 1.03 | 1.17 | 4.26  | 1.15 | 1.12 | 1.08 | 1.03 |
| May 2020    | 1.02 | 0.94 | 0.95 | 0.90 | 0.95 | 1.29 | 0.76 | 0.93 | 0.93 | 1.08 | 4.76  | 0.89 | 1.14 | 0.98 | 1.04 |
| Jun 2020    | 1.01 | 0.96 | 0.91 | 1.16 | 1.01 | 1.71 | 1.09 | 1.03 | 0.96 | 1.17 | 15.13 | 1.01 | 1.03 | 1.02 | 0.96 |
| Jul 2020    | 1.07 | 0.99 | 1.12 | 1.26 | 1.11 | 0.99 | 1.14 | 1.19 | 1.03 | 1.26 | 5.80  | 1.01 | 1.30 | 1.09 | 1.06 |
| Aug 2020    | 1.01 | 0.98 | 1.03 | 0.94 | 1.06 | 1.15 | 1.11 | 1.33 | 1.11 | 1.23 | 6.49  | 1.03 | 1.35 | 1.31 | 0.95 |
| Sep 2020    | 0.98 | 1.01 | 1.02 | 0.97 | 0.98 | 0.96 | 1.13 | 1.09 | 1.02 | 1.05 | 1.50  | 1.05 | 0.94 | 1.01 | 0.97 |
| Oct 2020    | 1.01 | 1.00 | 0.96 | 0.96 | 1.03 | 1.63 | 0.89 | 1.08 | 1.03 | 1.16 | 11.55 | 0.87 | 1.21 | 1.10 | 1.04 |
| Nov 2020    | 1.02 | 1.09 | 0.95 | 1.11 | 1.13 | 1.64 | 1.14 | 1.18 | 1.07 | 1.15 | 1.20  | 1.06 | 1.07 | 0.99 | 1.01 |
| Dec 2020    | 1.04 | 1.05 | 0.97 | 1.18 | 0.96 | 1.02 | 1.56 | 1.28 | 1.06 | 1.21 | 1.76  | 1.20 | 1.29 | 1.15 | 1.05 |
| Jan 2021    | 1.07 | 0.92 | 0.94 | 1.06 | 1.03 | 1.30 | 1.22 | 1.14 | 1.03 | 1.62 | 2.29  | 1.07 | 1.11 | 1.13 | 1.01 |
| Feb 2021    | 1.04 | 1.10 | 1.11 | 0.94 | 0.99 | 2.08 | 1.01 | 1.12 | 1.06 | 1.35 | 1.85  | 1.03 | 1.10 | 1.05 | 1.06 |
| Mar 2021    | 1.03 | 0.93 | 0.96 | 1.12 | 0.91 | 1.06 | 1.26 | 1.11 | 1.01 | 1.25 | 1.58  | 1.09 | 1.11 | 1.08 | 0.99 |
| Apr 2021    | 1.05 | 1.19 | 1.34 | 1.08 | 1.25 | 1.58 | 1.67 | 1.10 | 1.09 | 1.56 | 2.30  | 0.94 | 1.70 | 1.12 | 1.21 |
| May 2021    | 1.13 | 1.36 | 1.21 | 1.31 | 2.26 | 1.43 | 3.95 | 1.20 | 1.16 | 1.89 | 14.17 | 1.13 | 1.08 | 1.02 | 1.13 |
| Jun 2021    | 1.03 | 1.06 | 1.10 | 1.01 | 0.99 | 1.24 | 1.51 | 1.04 | 1.02 | 1.42 | 2.61  | 1.09 | 1.27 | 1.22 | 0.95 |
| Jul 2021    | 1.17 | 1.06 | 1.06 | 1.08 | 1.39 | 0.94 | 2.27 | 1.42 | 1.31 | 2.02 | 2.50  | 1.10 | 1.77 | 1.28 | 1.13 |
| Aug 2021    | 3.76 | 1.37 | 1.22 | 1.10 | 2.44 | 1.53 | 2.41 | 1.38 | 1.28 | 3.88 | 1.08  | 1.31 | 1.05 | 1.62 | 1.10 |
| Sep 2021    | 1.08 | 1.05 | 1.29 | 1.18 | 1.12 | 1.10 | 1.39 | 1.19 | 1.11 | 1.43 | 1.06  | 1.16 | 1.15 | 1.37 | 1.13 |
| Oct 2021    | 1.01 | 1.08 | 1.26 | 1.04 | 1.15 | 1.00 | 1.39 | 1.01 | 1.04 | 1.12 | 8.79  | 1.04 | 1.20 | 1.12 | 1.18 |
| Nov 2021    | 1.06 | 1.75 | 0.92 | 1.31 | 0.90 | 1.08 | 1.27 | 1.11 | 1.02 | 1.11 | 4.06  | 1.08 | 1.21 | 1.24 | 1.05 |
| Dec 2021    | 1.22 | 0.99 | 1.16 | 1.16 | 1.16 | 1.03 | 1.49 | 1.10 | 1.01 | 1.47 | 1.67  | 1.14 | 1.17 | 1.11 | 1.07 |
| Jan 2022    | 1.06 | 1.11 | 1.03 | 1.19 | 1.15 | 1.03 | 1.11 | 1.18 | 1.10 | 1.23 | 0.74  | 1.01 | 1.15 | 1.14 | 1.10 |
| Feb 2022    | 1.03 | 1.04 | 1.01 | 0.99 | 1.26 | 1.11 | 1.31 | 1.06 | 1.07 | 1.29 | 0.97  | 0.98 | 1.12 | 1.02 | 1.04 |

\*Before 11 March. \*\*Starting from 11 March.

Table D5: The Relative MAPE of forecasting models for companies 61–75 listed in Table A1.

| Time period | 61   | 62   | 63   | 64   | 65   | 66   | 67   | 68   | 69   | 70   | 71   | 72   | 73   | 74   | 75   |
|-------------|------|------|------|------|------|------|------|------|------|------|------|------|------|------|------|
| 2010–2018   | 0.99 | 1.00 | 1.04 | 1.14 | 1.04 | 1.07 | 1.00 | 1.11 | 1.04 | 0.99 | 0.98 | 1.07 | 1.05 | 0.98 | 1.00 |
| Jan 2019    | 1.01 | 1.05 | 1.00 | 1.07 | 1.12 | 1.11 | 1.08 | 1.07 | 1.01 | 1.20 | 0.94 | 0.97 | 0.93 | 1.02 | 1.07 |
| Feb 2019    | 0.96 | 0.89 | 0.99 | 0.95 | 1.02 | 1.05 | 0.88 | 1.06 | 0.91 | 0.91 | 0.96 | 0.99 | 0.98 | 0.89 | 0.96 |
| Mar 2019    | 0.98 | 1.01 | 0.97 | 0.98 | 1.07 | 0.99 | 0.92 | 1.04 | 0.99 | 1.01 | 0.90 | 1.01 | 0.92 | 1.03 | 1.04 |
| Apr 2019    | 1.01 | 0.96 | 1.01 | 0.96 | 1.11 | 1.01 | 1.02 | 1.09 | 0.97 | 1.02 | 0.85 | 1.02 | 1.14 | 0.98 | 1.02 |
| May 2019    | 1.11 | 1.10 | 1.07 | 1.06 | 1.42 | 1.03 | 1.06 | 1.00 | 1.06 | 1.26 | 1.17 | 1.01 | 0.97 | 1.06 | 1.41 |
| Jun 2019    | 1.02 | 1.00 | 0.99 | 0.96 | 1.06 | 1.08 | 0.92 | 1.12 | 0.92 | 1.04 | 0.97 | 1.00 | 1.01 | 0.94 | 0.95 |
| Jul 2019    | 1.01 | 1.16 | 1.05 | 1.15 | 1.00 | 1.11 | 0.92 | 1.15 | 1.02 | 0.92 | 0.98 | 1.06 | 1.02 | 0.98 | 0.97 |
| Aug 2019    | 1.08 | 1.15 | 1.01 | 1.03 | 1.08 | 1.06 | 0.95 | 1.08 | 0.95 | 0.96 | 0.91 | 0.91 | 1.09 | 1.05 | 1.12 |
| Sep 2019    | 1.09 | 1.01 | 1.03 | 1.05 | 1.04 | 1.11 | 0.94 | 1.16 | 1.11 | 1.06 | 1.05 | 1.04 | 0.98 | 1.02 | 1.18 |
| Oct 2019    | 1.10 | 1.23 | 0.98 | 0.95 | 1.07 | 1.06 | 0.95 | 1.05 | 1.02 | 0.98 | 0.95 | 1.06 | 0.98 | 1.05 | 0.95 |
| Nov 2019    | 0.95 | 1.06 | 1.01 | 0.96 | 1.03 | 1.11 | 1.06 | 1.01 | 1.10 | 1.19 | 1.04 | 1.19 | 0.99 | 1.11 | 1.29 |
| Dec 2019    | 0.93 | 1.22 | 1.01 | 0.96 | 1.25 | 1.01 | 0.98 | 1.02 | 1.19 | 1.11 | 1.33 | 1.08 | 1.43 | 1.20 | 3.17 |
| Jan 2020    | 1.16 | 1.03 | 1.07 | 1.11 | 1.07 | 1.03 | 1.00 | 1.15 | 1.14 | 1.04 | 1.08 | 1.18 | 1.02 | 1.02 | 1.02 |
| Feb 2020    | 0.93 | 0.90 | 0.99 | 0.97 | 0.96 | 1.16 | 0.91 | 1.05 | 0.98 | 0.87 | 0.99 | 1.00 | 0.99 | 0.88 | 0.85 |
| Mar 2020*   | 1.03 | 1.04 | 0.95 | 1.04 | 0.89 | 1.06 | 0.85 | 1.03 | 0.88 | 0.96 | 1.08 | 0.97 | 1.02 | 0.92 | 0.99 |
| Mar 2020**  | 1.31 | 1.31 | 1.01 | 1.08 | 1.06 | 1.05 | 1.28 | 0.88 | 1.12 | 1.10 | 1.18 | 1.20 | 1.03 | 1.18 | 1.17 |
| Apr 2020    | 1.09 | 1.09 | 1.01 | 1.07 | 1.02 | 1.05 | 1.23 | 1.17 | 1.06 | 1.09 | 1.12 | 1.08 | 1.06 | 1.01 | 1.08 |
| May 2020    | 1.08 | 1.05 | 1.03 | 1.03 | 1.02 | 1.05 | 0.97 | 1.02 | 0.91 | 0.94 | 0.86 | 1.17 | 1.01 | 1.26 | 1.04 |
| Jun 2020    | 1.04 | 1.11 | 1.04 | 0.99 | 0.98 | 1.03 | 1.10 | 1.06 | 0.98 | 0.97 | 1.05 | 1.15 | 0.99 | 1.04 | 1.08 |
| Jul 2020    | 1.22 | 1.12 | 1.08 | 1.04 | 1.08 | 1.05 | 1.21 | 1.12 | 1.10 | 1.07 | 1.30 | 1.06 | 1.02 | 1.18 | 0.93 |
| Aug 2020    | 1.49 | 1.22 | 1.00 | 0.94 | 1.09 | 1.02 | 1.40 | 1.17 | 0.91 | 1.16 | 1.43 | 1.36 | 0.95 | 1.10 | 1.03 |
| Sep 2020    | 1.02 | 1.04 | 1.02 | 0.99 | 0.95 | 0.98 | 1.02 | 1.14 | 0.97 | 1.05 | 1.09 | 1.20 | 1.00 | 1.07 | 1.10 |
| Oct 2020    | 0.99 | 1.10 | 1.06 | 1.00 | 1.03 | 1.00 | 1.15 | 1.11 | 0.92 | 1.15 | 1.14 | 0.99 | 0.94 | 1.00 | 1.01 |
| Nov 2020    | 0.93 | 1.29 | 1.00 | 0.92 | 1.06 | 1.07 | 1.06 | 1.25 | 1.09 | 1.10 | 1.27 | 1.05 | 0.99 | 1.16 | 0.97 |
| Dec 2020    | 1.09 | 1.47 | 1.07 | 1.05 | 1.09 | 1.02 | 1.01 | 1.31 | 1.12 | 1.12 | 1.96 | 1.07 | 1.08 | 1.02 | 0.94 |
| Jan 2021    | 0.96 | 0.79 | 0.99 | 1.05 | 1.11 | 1.04 | 1.21 | 1.39 | 0.90 | 0.94 | 1.01 | 1.04 | 0.96 | 1.13 | 1.04 |
| Feb 2021    | 0.90 | 1.27 | 1.09 | 1.02 | 1.09 | 1.05 | 1.04 | 1.23 | 1.13 | 1.05 | 1.32 | 0.98 | 0.98 | 1.00 | 0.97 |
| Mar 2021    | 1.17 | 1.19 | 1.06 | 1.07 | 1.05 | 1.02 | 1.15 | 1.29 | 1.13 | 1.03 | 1.07 | 0.97 | 1.06 | 1.10 | 0.95 |
| Apr 2021    | 1.71 | 1.39 | 1.04 | 1.31 | 1.12 | 1.04 | 1.32 | 1.17 | 1.18 | 1.24 | 1.49 | 1.30 | 1.04 | 1.30 | 1.10 |
| May 2021    | 1.48 | 1.75 | 1.18 | 1.18 | 1.28 | 1.01 | 1.58 | 1.62 | 1.28 | 1.26 | 1.97 | 1.55 | 1.09 | 1.64 | 1.42 |
| Jun 2021    | 1.37 | 1.54 | 1.23 | 1.03 | 1.08 | 1.00 | 1.48 | 1.40 | 0.91 | 1.45 | 1.21 | 1.24 | 1.10 | 1.27 | 1.12 |
| Jul 2021    | 1.49 | 1.84 | 1.20 | 1.23 | 1.08 | 1.07 | 1.44 | 1.43 | 0.94 | 1.19 | 1.39 | 1.26 | 1.06 | 1.29 | 0.98 |
| Aug 2021    | 1.23 | 3.86 | 1.12 | 1.14 | 1.27 | 1.05 | 1.96 | 1.32 | 1.48 | 1.14 | 1.59 | 1.98 | 1.34 | 2.08 | 1.51 |
| Sep 2021    | 1.02 | 1.26 | 1.04 | 1.03 | 1.08 | 1.00 | 1.30 | 1.27 | 1.21 | 1.12 | 1.34 | 1.17 | 1.01 | 1.21 | 1.22 |
| Oct 2021    | 1.23 | 1.54 | 0.99 | 1.02 | 1.12 | 1.03 | 1.00 | 1.28 | 1.15 | 1.10 | 1.15 | 1.13 | 1.12 | 1.02 | 1.01 |
| Nov 2021    | 1.24 | 1.45 | 1.02 | 1.09 | 1.01 | 1.03 | 1.10 | 1.27 | 1.16 | 1.42 | 0.98 | 1.23 | 1.20 | 1.07 | 1.05 |
| Dec 2021    | 1.10 | 1.17 | 1.04 | 1.13 | 1.13 | 1.08 | 0.98 | 1.10 | 1.24 | 1.30 | 1.30 | 1.69 | 1.29 | 1.21 | 1.21 |
| Jan 2022    | 1.27 | 1.16 | 1.12 | 1.02 | 1.10 | 1.03 | 1.36 | 1.09 | 1.12 | 1.22 | 1.11 | 1.30 | 1.01 | 1.19 | 1.05 |
| Feb 2022    | 1.19 | 1.39 | 1.01 | 1.04 | 1.02 | 1.05 | 1.28 | 1.01 | 1.05 | 1.08 | 1.13 | 1.16 | 0.99 | 1.25 | 0.98 |

\*Before 11 March. \*\*Starting from 11 March.

Table D6: The Relative MAPE of forecasting models for companies 76–90 listed in Table A1.

| Time period | 76   | 77   | 78   | 79   | 80   | 81   | 82   | 83   | 84   | 85   | 86   | 87   | 88   | 89   | 90   |
|-------------|------|------|------|------|------|------|------|------|------|------|------|------|------|------|------|
| 2010–2018   | 1.00 | 1.02 | 1.04 | 1.04 | 1.04 | 0.99 | 1.00 | 0.99 | 1.04 | 1.01 | 1.01 | 1.05 | 1.04 | 1.00 | 1.01 |
| Jan 2019    | 1.12 | 1.03 | 1.00 | 0.98 | 1.05 | 0.98 | 0.99 | 1.06 | 1.05 | 0.98 | 0.93 | 0.97 | 1.05 | 0.99 | 1.07 |
| Feb 2019    | 0.93 | 1.02 | 1.03 | 1.00 | 1.04 | 0.97 | 0.99 | 0.93 | 1.02 | 0.99 | 0.92 | 0.98 | 0.90 | 0.91 | 0.90 |
| Mar 2019    | 1.05 | 1.02 | 1.02 | 0.98 | 1.00 | 0.94 | 1.05 | 0.99 | 1.05 | 0.93 | 1.01 | 1.06 | 0.95 | 1.02 | 1.04 |
| Apr 2019    | 1.21 | 1.07 | 1.02 | 1.06 | 1.04 | 0.96 | 1.07 | 0.96 | 0.92 | 0.97 | 0.99 | 1.03 | 0.98 | 1.15 | 0.97 |
| May 2019    | 1.24 | 1.15 | 1.11 | 1.10 | 1.35 | 1.15 | 1.11 | 1.03 | 1.11 | 1.02 | 1.23 | 1.09 | 0.99 | 1.06 | 1.26 |
| Jun 2019    | 0.89 | 1.02 | 0.99 | 1.06 | 1.02 | 1.17 | 0.96 | 0.87 | 1.04 | 0.89 | 0.92 | 0.94 | 0.91 | 0.97 | 0.89 |
| Jul 2019    | 0.93 | 1.06 | 0.99 | 1.05 | 1.03 | 1.02 | 1.02 | 0.95 | 0.91 | 1.01 | 0.99 | 1.02 | 0.95 | 1.01 | 1.03 |
| Aug 2019    | 0.94 | 1.05 | 1.00 | 1.11 | 0.98 | 0.91 | 1.05 | 0.86 | 1.12 | 1.09 | 1.07 | 0.96 | 1.09 | 0.96 | 1.07 |
| Sep 2019    | 1.22 | 1.10 | 1.05 | 1.10 | 1.07 | 0.81 | 1.07 | 1.01 | 1.13 | 0.95 | 1.22 | 1.16 | 1.10 | 1.01 | 1.25 |
| Oct 2019    | 1.05 | 1.06 | 1.02 | 1.13 | 1.01 | 1.08 | 0.97 | 0.99 | 1.06 | 1.08 | 1.01 | 1.12 | 1.04 | 0.98 | 1.18 |
| Nov 2019    | 1.43 | 1.08 | 1.02 | 1.08 | 0.98 | 1.11 | 1.07 | 1.00 | 1.12 | 0.94 | 1.11 | 1.23 | 1.28 | 1.19 | 1.44 |
| Dec 2019    | 1.27 | 1.04 | 1.13 | 0.99 | 1.03 | 1.13 | 1.46 | 1.01 | 1.77 | 1.27 | 1.29 | 2.21 | 1.47 | 1.12 | 1.33 |
| Jan 2020    | 1.08 | 1.01 | 1.03 | 1.12 | 1.13 | 1.04 | 0.98 | 1.01 | 1.52 | 1.08 | 1.38 | 1.19 | 1.12 | 1.15 | 1.21 |
| Feb 2020    | 0.90 | 1.00 | 0.97 | 0.96 | 0.99 | 0.97 | 0.94 | 0.97 | 0.96 | 1.00 | 0.92 | 0.95 | 1.07 | 0.97 | 0.86 |
| Mar 2020*   | 1.18 | 0.78 | 0.91 | 0.80 | 0.97 | 0.91 | 1.07 | 0.93 | 1.08 | 0.93 | 0.91 | 0.90 | 0.89 | 0.86 | 0.85 |
| Mar 2020**  | 1.37 | 1.13 | 1.12 | 1.22 | 1.01 | 0.78 | 0.97 | 1.13 | 1.09 | 1.00 | 1.11 | 1.20 | 1.11 | 1.08 | 1.38 |
| Apr 2020    | 1.22 | 1.12 | 1.06 | 1.33 | 1.06 | 0.99 | 1.09 | 1.00 | 1.20 | 0.98 | 1.23 | 1.07 | 0.97 | 1.03 | 1.09 |
| May 2020    | 1.23 | 0.99 | 0.99 | 0.94 | 1.05 | 0.90 | 0.95 | 0.81 | 1.29 | 0.90 | 0.95 | 0.88 | 0.84 | 0.96 | 0.87 |
| Jun 2020    | 1.18 | 1.10 | 1.04 | 1.17 | 1.10 | 0.92 | 0.96 | 0.97 | 1.26 | 0.94 | 1.19 | 0.90 | 0.98 | 0.97 | 1.06 |
| Jul 2020    | 1.37 | 1.19 | 1.06 | 1.30 | 1.02 | 1.36 | 1.03 | 1.03 | 2.36 | 1.00 | 1.09 | 1.10 | 0.98 | 0.97 | 1.00 |
| Aug 2020    | 1.38 | 1.74 | 1.07 | 1.44 | 1.03 | 0.91 | 0.92 | 0.98 | 1.66 | 0.92 | 0.96 | 1.07 | 1.05 | 1.06 | 1.22 |
| Sep 2020    | 1.26 | 1.07 | 1.01 | 1.04 | 1.04 | 1.00 | 1.02 | 1.02 | 1.32 | 0.97 | 0.96 | 1.04 | 1.11 | 0.98 | 1.08 |
| Oct 2020    | 1.24 | 1.11 | 1.06 | 0.92 | 0.97 | 1.05 | 1.04 | 1.01 | 1.16 | 0.92 | 1.01 | 1.17 | 1.00 | 1.03 | 1.23 |
| Nov 2020    | 1.14 | 1.14 | 0.98 | 1.05 | 1.04 | 0.84 | 0.97 | 1.06 | 1.31 | 0.98 | 0.93 | 0.99 | 1.07 | 0.99 | 1.09 |
| Dec 2020    | 1.12 | 1.17 | 1.10 | 1.65 | 1.04 | 1.00 | 1.05 | 0.93 | 1.36 | 1.14 | 1.22 | 1.23 | 1.15 | 1.10 | 1.23 |
| Jan 2021    | 1.16 | 1.07 | 1.55 | 1.13 | 0.97 | 0.98 | 1.01 | 1.06 | 1.25 | 0.99 | 0.90 | 1.13 | 1.18 | 0.93 | 1.24 |
| Feb 2021    | 1.28 | 1.26 | 1.05 | 1.09 | 1.10 | 1.08 | 0.98 | 1.09 | 1.16 | 0.99 | 0.97 | 1.08 | 1.21 | 1.05 | 1.32 |
| Mar 2021    | 1.30 | 1.11 | 1.08 | 1.02 | 1.17 | 1.26 | 1.55 | 1.14 | 1.06 | 0.99 | 1.21 | 1.23 | 1.47 | 1.18 | 1.13 |
| Apr 2021    | 1.63 | 1.40 | 1.13 | 1.56 | 1.05 | 1.01 | 1.23 | 1.10 | 1.64 | 1.08 | 1.41 | 1.17 | 1.62 | 1.28 | 1.32 |
| May 2021    | 2.07 | 1.51 | 1.17 | 1.39 | 1.10 | 1.17 | 1.01 | 1.63 | 1.59 | 1.29 | 1.10 | 1.22 | 1.65 | 1.22 | 1.58 |
| Jun 2021    | 1.26 | 1.24 | 1.15 | 1.27 | 0.89 | 0.84 | 1.00 | 1.00 | 1.34 | 0.90 | 1.11 | 1.02 | 1.36 | 1.05 | 1.32 |
| Jul 2021    | 2.28 | 1.30 | 1.13 | 1.56 | 1.00 | 1.12 | 1.00 | 1.06 | 1.79 | 0.91 | 1.07 | 1.23 | 1.38 | 1.01 | 1.14 |
| Aug 2021    | 2.01 | 2.08 | 1.25 | 1.68 | 1.28 | 1.56 | 1.42 | 2.47 | 2.67 | 1.14 | 1.60 | 1.21 | 1.91 | 1.39 | 2.09 |
| Sep 2021    | 1.37 | 1.17 | 1.23 | 1.26 | 1.01 | 1.07 | 1.38 | 1.44 | 1.20 | 1.08 | 1.25 | 1.21 | 1.34 | 1.22 | 1.35 |
| Oct 2021    | 1.86 | 1.29 | 0.99 | 1.34 | 1.13 | 1.20 | 1.04 | 0.96 | 0.99 | 1.25 | 1.12 | 1.32 | 1.48 | 1.16 | 1.22 |
| Nov 2021    | 1.09 | 1.07 | 1.03 | 1.23 | 1.05 | 1.19 | 0.96 | 0.88 | 0.93 | 1.11 | 1.27 | 1.22 | 1.09 | 1.02 | 1.16 |
| Dec 2021    | 1.70 | 1.15 | 1.12 | 1.16 | 1.07 | 1.69 | 0.96 | 1.22 | 1.18 | 1.17 | 1.09 | 1.02 | 1.54 | 1.21 | 1.02 |
| Jan 2022    | 1.29 | 1.21 | 1.01 | 1.29 | 1.03 | 0.96 | 1.07 | 1.01 | 1.20 | 1.04 | 1.09 | 1.03 | 1.06 | 1.07 | 1.14 |
| Feb 2022    | 1.24 | 1.22 | 1.00 | 1.18 | 1.01 | 1.01 | 0.99 | 1.03 | 1.12 | 0.98 | 1.03 | 1.00 | 1.17 | 1.03 | 1.14 |

\*Before 11 March. \*\*Starting from 11 March.

## E. Summary Statistics of Relative Error Metrics

Table E1: Percentages of models outperforming the benchmark.

| Time period | Relative RMSE                                |                                                  | Relative MAE                                 |                                                  | Relative MAPE                                |                                                  |
|-------------|----------------------------------------------|--------------------------------------------------|----------------------------------------------|--------------------------------------------------|----------------------------------------------|--------------------------------------------------|
|             | Number of models outperforming the benchmark | Percentage of models outperforming the benchmark | Number of models outperforming the benchmark | Percentage of models outperforming the benchmark | Number of models outperforming the benchmark | Percentage of models outperforming the benchmark |
| 2010–2018   | 90                                           | 100.0%                                           | 33                                           | 36.7%                                            | 22                                           | 24.4%                                            |
| Jan 2019    | 60                                           | 66.7%                                            | 36                                           | 40.0%                                            | 34                                           | 37.8%                                            |
| Feb 2019    | 77                                           | 85.6%                                            | 63                                           | 70.0%                                            | 63                                           | 70.0%                                            |
| Mar 2019    | 49                                           | 54.4%                                            | 44                                           | 48.9%                                            | 44                                           | 48.9%                                            |
| Apr 2019    | 73                                           | 81.1%                                            | 30                                           | 33.3%                                            | 30                                           | 33.3%                                            |
| May 2019    | 24                                           | 26.7%                                            | 3                                            | 3.3%                                             | 4                                            | 4.4%                                             |
| Jun 2019    | 78                                           | 86.7%                                            | 59                                           | 65.6%                                            | 59                                           | 65.6%                                            |
| Jul 2019    | 69                                           | 76.7%                                            | 39                                           | 43.3%                                            | 38                                           | 42.2%                                            |
| Aug 2019    | 79                                           | 87.8%                                            | 31                                           | 34.4%                                            | 32                                           | 35.6%                                            |
| Sep 2019    | 34                                           | 37.8%                                            | 20                                           | 22.2%                                            | 18                                           | 20.0%                                            |
| Oct 2019    | 63                                           | 70.0%                                            | 24                                           | 26.7%                                            | 24                                           | 26.7%                                            |
| Nov 2019    | 34                                           | 37.8%                                            | 9                                            | 10.0%                                            | 10                                           | 11.1%                                            |
| Dec 2019    | 43                                           | 47.8%                                            | 11                                           | 12.2%                                            | 11                                           | 12.2%                                            |
| Jan 2020    | 21                                           | 23.3%                                            | 4                                            | 4.4%                                             | 4                                            | 4.4%                                             |
| Feb 2020    | 84                                           | 93.3%                                            | 76                                           | 84.4%                                            | 73                                           | 81.1%                                            |
| Mar 2020*   | 68                                           | 75.6%                                            | 65                                           | 72.2%                                            | 59                                           | 65.6%                                            |
| Mar 2020**  | 17                                           | 18.9%                                            | 7                                            | 7.8%                                             | 8                                            | 8.9%                                             |
| Apr 2020    | 20                                           | 22.2%                                            | 11                                           | 12.2%                                            | 11                                           | 12.2%                                            |
| May 2020    | 71                                           | 78.9%                                            | 52                                           | 57.8%                                            | 52                                           | 57.8%                                            |
| Jun 2020    | 45                                           | 50.0%                                            | 29                                           | 32.2%                                            | 30                                           | 33.3%                                            |
| Jul 2020    | 36                                           | 40.0%                                            | 14                                           | 15.6%                                            | 14                                           | 15.6%                                            |
| Aug 2020    | 40                                           | 44.4%                                            | 19                                           | 21.1%                                            | 19                                           | 21.1%                                            |
| Sep 2020    | 55                                           | 61.1%                                            | 34                                           | 37.8%                                            | 34                                           | 37.8%                                            |
| Oct 2020    | 49                                           | 54.4%                                            | 34                                           | 37.8%                                            | 31                                           | 34.4%                                            |
| Nov 2020    | 65                                           | 72.2%                                            | 30                                           | 33.3%                                            | 27                                           | 30.0%                                            |
| Dec 2020    | 38                                           | 42.2%                                            | 9                                            | 10.0%                                            | 9                                            | 10.0%                                            |
| Jan 2021    | 46                                           | 51.1%                                            | 26                                           | 28.9%                                            | 24                                           | 26.7%                                            |
| Feb 2021    | 37                                           | 41.1%                                            | 19                                           | 21.1%                                            | 19                                           | 21.1%                                            |
| Mar 2021    | 20                                           | 22.2%                                            | 11                                           | 12.2%                                            | 12                                           | 13.3%                                            |
| Apr 2021    | 21                                           | 23.3%                                            | 2                                            | 2.2%                                             | 2                                            | 2.2%                                             |
| May 2021    | 6                                            | 6.7%                                             | 1                                            | 1.1%                                             | 1                                            | 1.1%                                             |
| Jun 2021    | 32                                           | 35.6%                                            | 14                                           | 15.6%                                            | 16                                           | 17.8%                                            |
| Jul 2021    | 36                                           | 40.0%                                            | 12                                           | 13.3%                                            | 12                                           | 13.3%                                            |
| Aug 2021    | 10                                           | 11.1%                                            | 1                                            | 1.1%                                             | 1                                            | 1.1%                                             |
| Sep 2021    | 51                                           | 56.7%                                            | 1                                            | 1.1%                                             | 1                                            | 1.1%                                             |
| Oct 2021    | 21                                           | 23.3%                                            | 10                                           | 11.1%                                            | 10                                           | 11.1%                                            |
| Nov 2021    | 12                                           | 13.3%                                            | 11                                           | 12.2%                                            | 11                                           | 12.2%                                            |
| Dec 2021    | 39                                           | 43.3%                                            | 9                                            | 10.0%                                            | 9                                            | 10.0%                                            |
| Jan 2022    | 25                                           | 27.8%                                            | 5                                            | 5.6%                                             | 5                                            | 5.6%                                             |
| Feb 2022    | 14                                           | 15.6%                                            | 18                                           | 20.0%                                            | 18                                           | 20.0%                                            |

\*Before 11 March. \*\*Starting from 11 March.

Table E2: Average values and standard deviations of relative error metrics for 5 best performances.

| Time period | Relative RMSE |                    | Relative MAE |                    | Relative MAPE |                    |
|-------------|---------------|--------------------|--------------|--------------------|---------------|--------------------|
|             | Value         | Standard Deviation | Value        | Standard Deviation | Value         | Standard Deviation |
| 2010–2018   | 0.9344        | 0.0077             | 0.9688       | 0.0068             | 0.9823        | 0.0047             |
| Jan 2019    | 0.9015        | 0.0134             | 0.9200       | 0.0093             | 0.9207        | 0.0085             |
| Feb 2019    | 0.8842        | 0.0171             | 0.8667       | 0.0150             | 0.8724        | 0.0128             |
| Mar 2019    | 0.9412        | 0.0087             | 0.9120       | 0.0116             | 0.9132        | 0.0106             |
| Apr 2019    | 0.8804        | 0.0316             | 0.9158       | 0.0366             | 0.9170        | 0.0348             |
| May 2019    | 0.9517        | 0.0068             | 0.9917       | 0.0110             | 0.9917        | 0.0098             |
| Jun 2019    | 0.8567        | 0.0200             | 0.8520       | 0.0371             | 0.8528        | 0.0364             |
| Jul 2019    | 0.8961        | 0.0119             | 0.9038       | 0.0122             | 0.9044        | 0.0111             |
| Aug 2019    | 0.8731        | 0.0082             | 0.8941       | 0.0181             | 0.8934        | 0.0171             |
| Sep 2019    | 0.9276        | 0.0174             | 0.8856       | 0.0500             | 0.8852        | 0.0535             |
| Oct 2019    | 0.8990        | 0.0141             | 0.9305       | 0.0152             | 0.9358        | 0.0155             |
| Nov 2019    | 0.9116        | 0.0101             | 0.9401       | 0.0076             | 0.9395        | 0.0080             |
| Dec 2019    | 0.8793        | 0.0171             | 0.9580       | 0.0148             | 0.9596        | 0.0169             |
| Jan 2020    | 0.9498        | 0.0084             | 0.9721       | 0.0255             | 0.9710        | 0.0281             |
| Feb 2020    | 0.8356        | 0.0086             | 0.8300       | 0.0457             | 0.8363        | 0.0488             |
| Mar 2020*   | 0.7221        | 0.0179             | 0.7984       | 0.0201             | 0.8119        | 0.0199             |
| Mar 2020**  | 0.8666        | 0.0618             | 0.8803       | 0.0545             | 0.8753        | 0.0481             |
| Apr 2020    | 0.9522        | 0.0113             | 0.9492       | 0.0126             | 0.9475        | 0.0123             |
| May 2020    | 0.7981        | 0.0127             | 0.8024       | 0.0407             | 0.8014        | 0.0406             |
| Jun 2020    | 0.8959        | 0.0089             | 0.9182       | 0.0126             | 0.9182        | 0.0129             |
| Jul 2020    | 0.8783        | 0.0547             | 0.9577       | 0.0135             | 0.9620        | 0.0150             |
| Aug 2020    | 0.8585        | 0.0369             | 0.9197       | 0.0112             | 0.9186        | 0.0105             |
| Sep 2020    | 0.9338        | 0.0152             | 0.9173       | 0.0149             | 0.9198        | 0.0111             |
| Oct 2020    | 0.9020        | 0.0254             | 0.8763       | 0.0225             | 0.8846        | 0.0182             |
| Nov 2020    | 0.8327        | 0.0946             | 0.8157       | 0.1331             | 0.8212        | 0.1356             |
| Dec 2020    | 0.9294        | 0.0084             | 0.9294       | 0.0244             | 0.9290        | 0.0236             |
| Jan 2021    | 0.8809        | 0.0039             | 0.8695       | 0.0389             | 0.8678        | 0.0394             |
| Feb 2021    | 0.8618        | 0.0591             | 0.9207       | 0.0117             | 0.9236        | 0.0117             |
| Mar 2021    | 0.9566        | 0.0144             | 0.9324       | 0.0148             | 0.9306        | 0.0156             |
| Apr 2021    | 0.9618        | 0.0120             | 0.9953       | 0.0334             | 0.9936        | 0.0367             |
| May 2021    | 0.9627        | 0.0200             | 1.0111       | 0.0219             | 1.0120        | 0.0245             |
| Jun 2021    | 0.8822        | 0.0174             | 0.8781       | 0.0254             | 0.8771        | 0.0246             |
| Jul 2021    | 0.8873        | 0.0213             | 0.9062       | 0.0418             | 0.9063        | 0.0417             |
| Aug 2021    | 0.9565        | 0.0147             | 1.0316       | 0.0277             | 1.0314        | 0.0274             |
| Sep 2021    | 0.9513        | 0.0122             | 1.0009       | 0.0120             | 1.0011        | 0.0123             |
| Oct 2021    | 0.9370        | 0.0170             | 0.9548       | 0.0098             | 0.9546        | 0.0112             |
| Nov 2021    | 0.9137        | 0.0259             | 0.8929       | 0.0163             | 0.8872        | 0.0198             |
| Dec 2021    | 0.8630        | 0.0433             | 0.9495       | 0.0365             | 0.9496        | 0.0355             |
| Jan 2022    | 0.9369        | 0.0504             | 0.9226       | 0.0960             | 0.9230        | 0.0937             |
| Feb 2022    | 0.9573        | 0.0037             | 0.9511       | 0.0106             | 0.9514        | 0.0107             |

\*Before 11 March. \*\*Starting from 11 March.

## F. The Coefficients of ARDL Models

Table F1: The coefficients of ARDL models for companies 1–9 listed in Table A1.

| Variable                                                 | 1                   | 2                   | 3                   | 4                   | 5                   | 6                   | 7                   | 8                   | 9                   |
|----------------------------------------------------------|---------------------|---------------------|---------------------|---------------------|---------------------|---------------------|---------------------|---------------------|---------------------|
| $\Delta \ln(\text{market capitalisation})_{t-1}$         | -0.0658<br>(0.0257) |                     | -0.264<br>(0.0297)  | -0.2134<br>(0.0266) | -0.4897<br>(0.0412) | -0.0991<br>(0.0486) | -0.1747<br>(0.0475) | -0.1771<br>(0.0307) | -0.2298<br>(0.0383) |
| $\Delta \ln(\text{STOXX 50})_{t-1}$                      | -0.163<br>(0.0524)  | -0.188<br>(0.0835)  |                     |                     | 0.1811<br>(0.0666)  | -0.2726<br>(0.0929) | -0.1337<br>(0.0664) |                     |                     |
| $\Delta \ln(\text{volatility index for STOXX 50})_{t-1}$ |                     |                     |                     |                     |                     |                     |                     |                     |                     |
| $\Delta(\text{3-month LIBOR for EUR})_{t-1}$             |                     |                     |                     |                     |                     |                     |                     | 0.2114<br>(0.0902)  |                     |
| $\Delta \ln(\text{3-month LIBOR for USD})_{t-1}$         |                     |                     |                     |                     |                     | -0.1826<br>(0.0893) |                     |                     | -0.2039<br>(0.0782) |
| $\Delta \ln(\text{3-month LIBOR for GBP})_{t-1}$         |                     |                     |                     |                     |                     |                     |                     |                     |                     |
| $\Delta \ln(\text{EUR/USD exchange rate})_{t-1}$         | -0.4877<br>(0.094)  | -0.678<br>(0.143)   |                     | -0.6916<br>(0.1157) |                     | -1.0573<br>(0.1416) | -0.4584<br>(0.086)  | -0.3443<br>(0.082)  | -0.6047<br>(0.1057) |
| $\Delta \ln(\text{EUR/GBP exchange rate})_{t-1}$         | 0.2551<br>(0.1028)  |                     |                     |                     |                     | 0.5081<br>(0.1534)  |                     |                     |                     |
| $\Delta \ln(\text{EUR/CNY exchange rate})_{t-1}$         |                     |                     | -0.4284<br>(0.1059) |                     | -0.3523<br>(0.1025) |                     |                     |                     |                     |
| $\Delta(\text{German 10-year bond yield})_{t-1}$         |                     | -0.0582<br>(0.0215) |                     |                     |                     |                     |                     |                     |                     |
| $\Delta(\text{French 10-year bond yield})_{t-1}$         |                     |                     |                     |                     |                     |                     |                     |                     |                     |
| $\Delta \ln(\text{Italian 10-year bond yield})_{t-1}$    | 0.0401<br>(0.02)    | 0.0787<br>(0.0356)  |                     |                     | 0.0603<br>(0.0258)  | 0.0728<br>(0.0299)  |                     | 0.0445<br>(0.0197)  |                     |
| $\Delta \ln(\text{gold futures})_{t-1}$                  | 0.0758<br>(0.0367)  |                     | 0.0995<br>(0.0473)  |                     |                     | 0.1797<br>(0.0548)  |                     |                     |                     |
| $\Delta \ln(\text{Brent crude oil futures})_{t-1}$       | -0.053<br>(0.0256)  |                     |                     | -0.1494<br>(0.0372) |                     |                     |                     | -0.0935<br>(0.0254) | -0.0754<br>(0.033)  |
| $\Delta \ln(\text{natural gas futures})_{t-1}$           |                     |                     |                     |                     |                     |                     |                     |                     |                     |
| $\Delta \ln(\text{CDS spread})_{t-1}$                    |                     |                     |                     |                     | 0.1165<br>(0.0208)  |                     | 0.0436<br>(0.0222)  | 0.0741<br>(0.0211)  | 0.0905<br>(0.0218)  |
| AIC                                                      | -4.788              | -3.702              | -4.255              | -4.062              | -4.3057             | -3.984              | -4.641              | -4.749              | -4.249              |

All coefficients are significant at least at 5% significance level.

Table F2: The coefficients of ARDL models for companies 10–18 listed in Table A1.

| Variable                                                 | 10                  | 11                  | 12                  | 13                  | 14                  | 15                  | 16                  | 17                  | 18                  |
|----------------------------------------------------------|---------------------|---------------------|---------------------|---------------------|---------------------|---------------------|---------------------|---------------------|---------------------|
| $\Delta \ln(\text{market capitalisation})_{t-1}$         |                     |                     | -0.1672<br>(0.0274) | -0.1475<br>(0.029)  |                     | -0.1598<br>(0.0374) | -0.0477<br>(0.0181) |                     | -0.2227<br>(0.0352) |
| $\Delta \ln(\text{STOXX 50})_{t-1}$                      | -0.1675<br>(0.0477) |                     |                     |                     | -0.2491<br>(0.049)  |                     | -0.2514<br>(0.0513) | -0.3262<br>(0.07)   |                     |
| $\Delta \ln(\text{volatility index for STOXX 50})_{t-1}$ |                     |                     |                     | 0.0241<br>(0.0075)  |                     | 0.0263<br>(0.0104)  |                     |                     | 0.0268<br>(0.0107)  |
| $\Delta(\text{3-month LIBOR for EUR})_{t-1}$             |                     |                     |                     |                     |                     |                     |                     |                     |                     |
| $\Delta \ln(\text{3-month LIBOR for USD})_{t-1}$         | -0.1523<br>(0.0561) | -0.2103<br>(0.0991) |                     |                     |                     |                     |                     | -0.2388<br>(0.0893) |                     |
| $\Delta \ln(\text{3-month LIBOR for GBP})_{t-1}$         |                     |                     | 0.1229<br>(0.0625)  |                     |                     |                     |                     |                     |                     |
| $\Delta \ln(\text{EUR/USD exchange rate})_{t-1}$         |                     | -0.6405<br>(0.1374) |                     | -0.2218<br>(0.0716) | -0.4064<br>(0.0852) |                     | -0.4318<br>(0.0924) | -0.7814<br>(0.1202) | -0.4601<br>(0.0996) |
| $\Delta \ln(\text{EUR/GBP exchange rate})_{t-1}$         |                     |                     | 0.226<br>(0.1045)   |                     |                     |                     |                     |                     |                     |
| $\Delta \ln(\text{EUR/CNY exchange rate})_{t-1}$         | -0.374<br>(0.0783)  |                     | -0.4287<br>(0.0947) |                     |                     | -0.3162<br>(0.095)  |                     |                     |                     |
| $\Delta(\text{German 10-year bond yield})_{t-1}$         | -0.0236<br>(0.0118) | -0.0543<br>(0.0202) |                     |                     |                     |                     |                     |                     | -0.0405<br>(0.0148) |
| $\Delta(\text{French 10-year bond yield})_{t-1}$         |                     |                     |                     |                     |                     |                     |                     |                     |                     |
| $\Delta \ln(\text{Italian 10-year bond yield})_{t-1}$    | 0.0704<br>(0.0195)  | 0.1182<br>(0.0338)  | 0.0585<br>(0.0198)  | 0.0519<br>(0.0169)  |                     | 0.0459<br>(0.0229)  |                     |                     | 0.0644<br>(0.0239)  |
| $\Delta \ln(\text{gold futures})_{t-1}$                  |                     |                     |                     | 0.0641<br>(0.032)   |                     |                     |                     |                     |                     |
| $\Delta \ln(\text{Brent crude oil futures})_{t-1}$       | -0.0604<br>(0.0237) |                     | -0.0815<br>(0.0255) | -0.0537<br>(0.0219) | -0.0832<br>(0.0267) | -0.099<br>(0.0292)  | -0.0799<br>(0.0291) |                     |                     |
| $\Delta \ln(\text{natural gas futures})_{t-1}$           |                     |                     |                     |                     |                     |                     |                     |                     |                     |
| $\Delta \ln(\text{CDS spread})_{t-1}$                    | 0.112<br>(0.0215)   | 0.1176<br>(0.0231)  | 0.084<br>(0.0211)   |                     | 0.1134<br>(0.022)   | 0.0697<br>(0.0230)  |                     | 0.1146<br>(0.0229)  |                     |
| AIC                                                      | -4.92               | -3.77               | -4.755              | -5.057              | -4.679              | -4.473              | -4.509              | -3.981              | -4.438              |

All coefficients are significant at least at 5% significance level.



Table F3: The coefficients of ARDL models for companies 19–27 listed in Table A1.

| Variable                                                 | 19                  | 20                  | 21                  | 22                  | 23                  | 24                  | 25                  | 26                  | 27                  |
|----------------------------------------------------------|---------------------|---------------------|---------------------|---------------------|---------------------|---------------------|---------------------|---------------------|---------------------|
| $\Delta \ln(\text{market capitalisation})_{t-1}$         | -0.2132<br>(0.0382) | -0.1579<br>(0.0262) |                     |                     |                     |                     | -0.1179<br>(0.0277) | -0.1398<br>(0.0272) |                     |
| $\Delta \ln(\text{STOXX 50})_{t-1}$                      |                     |                     | -0.3265<br>(0.0930) | -0.2634<br>(0.0815) | -0.2116<br>(0.043)  | -0.3505<br>(0.0743) | -0.1652<br>(0.0517) |                     | -0.2393<br>(0.0476) |
| $\Delta \ln(\text{volatility index for STOXX 50})_{t-1}$ |                     |                     |                     |                     |                     |                     |                     |                     |                     |
| $\Delta(\text{3-month LIBOR for EUR})_{t-1}$             |                     |                     |                     |                     |                     |                     |                     | 0.1608<br>(0.0705)  |                     |
| $\Delta \ln(\text{3-month LIBOR for USD})_{t-1}$         |                     |                     | -0.3431<br>(0.1124) | -0.3046<br>(0.1014) |                     | -0.1955<br>(0.0936) | -0.1616<br>(0.0604) |                     | -0.2027<br>(0.0571) |
| $\Delta \ln(\text{3-month LIBOR for GBP})_{t-1}$         |                     |                     |                     |                     |                     |                     |                     |                     |                     |
| $\Delta \ln(\text{EUR/USD exchange rate})_{t-1}$         | -0.3013<br>(0.1077) | -0.386<br>(0.0856)  | -1.0697<br>(0.1776) | -0.7442<br>(0.1368) | -0.3699<br>(0.0777) | -0.7493<br>(0.1253) | -0.4258<br>(0.0802) |                     | -0.4672<br>(0.0804) |
| $\Delta \ln(\text{EUR/GBP exchange rate})_{t-1}$         |                     |                     | 0.4218<br>(0.1933)  |                     |                     |                     |                     |                     |                     |
| $\Delta \ln(\text{EUR/CNY exchange rate})_{t-1}$         |                     |                     |                     |                     |                     |                     |                     | -0.1693<br>(0.0658) |                     |
| $\Delta(\text{German 10-year bond yield})_{t-1}$         | -0.0402<br>(0.0158) |                     | -0.0557<br>(0.0235) |                     |                     |                     |                     | -0.022<br>(0.0096)  | -0.0329<br>(0.012)  |
| $\Delta(\text{French 10-year bond yield})_{t-1}$         |                     |                     |                     |                     |                     |                     |                     |                     |                     |
| $\Delta \ln(\text{Italian 10-year bond yield})_{t-1}$    | 0.1122<br>(0.0255)  | 0.0431<br>(0.0209)  | 0.1287<br>(0.039)   |                     |                     | 0.0461<br>(0.0196)  |                     | 0.058<br>(0.0202)   | 0.0732<br>(0.0157)  |
| $\Delta \ln(\text{gold futures})_{t-1}$                  |                     |                     |                     |                     |                     |                     |                     |                     |                     |
| $\Delta \ln(\text{Brent crude oil futures})_{t-1}$       |                     |                     |                     |                     |                     |                     |                     |                     | -0.0622<br>(0.0243) |
| $\Delta \ln(\text{natural gas futures})_{t-1}$           |                     |                     |                     |                     |                     |                     |                     |                     |                     |
| $\Delta \ln(\text{CDS spread})_{t-1}$                    | -0.0904<br>(0.0216) | 0.1192<br>(0.0218)  |                     | 0.1218<br>(0.0236)  |                     | 0.097<br>(0.0234)   | 0.0447<br>(0.0218)  | -0.0743<br>(0.0211) |                     |
| AIC                                                      | -4.256              | -4.642              | -3.518              | -3.724              | -4.83               | -3.892              | -4.776              | -5.241              | -4.872              |

All coefficients are significant at least at 5% significance level.

Table F4: The coefficients of ARDL models for companies 28–36 listed in Table A1.

| Variable                                                 | 28                  | 29                  | 30                  | 31                  | 32                  | 33                  | 34                  | 35                  | 36                  |
|----------------------------------------------------------|---------------------|---------------------|---------------------|---------------------|---------------------|---------------------|---------------------|---------------------|---------------------|
| $\Delta \ln(\text{market capitalisation})_{t-1}$         |                     | -0.1897<br>(0.0452) | -0.0898<br>(0.028)  | -0.0555<br>(0.0224) |                     |                     |                     | -0.119<br>(0.0374)  | -0.0843<br>(0.0309) |
| $\Delta \ln(\text{STOXX 50})_{t-1}$                      | -0.2842<br>(0.0457) |                     | -0.1345<br>(0.0541) |                     | -0.289<br>(0.0434)  | -0.2977<br>(0.0711) | -0.2705<br>(0.0611) |                     | -0.1858<br>(0.0489) |
| $\Delta \ln(\text{volatility index for STOXX 50})_{t-1}$ |                     |                     |                     | 0.0229<br>(0.0075)  |                     |                     |                     | 0.0477<br>(0.0099)  |                     |
| $\Delta(\text{3-month LIBOR for EUR})_{t-1}$             |                     |                     |                     |                     |                     |                     |                     |                     |                     |
| $\Delta \ln(\text{3-month LIBOR for USD})_{t-1}$         | -0.1513<br>(0.0573) | -0.3464<br>(0.0878) |                     |                     | -0.2058<br>(0.0568) | -0.2883<br>(0.0862) |                     | 0.1385<br>(0.0666)  |                     |
| $\Delta \ln(\text{3-month LIBOR for GBP})_{t-1}$         |                     |                     |                     |                     |                     |                     |                     |                     |                     |
| $\Delta \ln(\text{EUR/USD exchange rate})_{t-1}$         | -0.413<br>(0.077)   |                     | -0.4237<br>(0.0827) |                     | -0.4023<br>(0.0777) |                     | -0.4229<br>(0.1016) | -0.3456<br>(0.0915) |                     |
| $\Delta \ln(\text{EUR/GBP exchange rate})_{t-1}$         |                     |                     |                     | 0.1741<br>(0.0879)  |                     |                     |                     |                     | 0.184<br>(0.0923)   |
| $\Delta \ln(\text{EUR/CNY exchange rate})_{t-1}$         |                     | -0.5488<br>(0.119)  |                     | -0.352<br>(0.0802)  |                     | -0.7032<br>(0.1202) |                     |                     | -0.3151<br>(0.0854) |
| $\Delta(\text{German 10-year bond yield})_{t-1}$         |                     |                     | -0.0375<br>(0.0125) |                     |                     | -0.0544<br>(0.0186) | -0.0405<br>(0.0153) |                     | -0.0259<br>(0.0113) |
| $\Delta(\text{French 10-year bond yield})_{t-1}$         |                     | -0.0453<br>(0.0178) |                     |                     |                     |                     |                     |                     |                     |
| $\Delta \ln(\text{Italian 10-year bond yield})_{t-1}$    | 0.0537<br>(0.0193)  | 0.12<br>(0.0317)    | 0.084<br>(0.0207)   | 0.0528<br>(0.0167)  | 0.0433<br>(0.0191)  | 0.1116<br>(0.0310)  | 0.1135<br>(0.0255)  | 0.0625<br>(0.0216)  | 0.0517<br>(0.0186)  |
| $\Delta \ln(\text{gold futures})_{t-1}$                  |                     |                     |                     |                     | 0.0702<br>(0.035)   |                     |                     | 0.1228<br>(0.0409)  |                     |
| $\Delta \ln(\text{Brent crude oil futures})_{t-1}$       | -0.0592<br>(0.0243) | -0.1419<br>(0.0366) |                     | -0.0768<br>(0.0214) | -0.0745<br>(0.0242) |                     | -0.1031<br>(0.0308) | -0.1477<br>(0.0303) | -0.0573<br>(0.0228) |
| $\Delta \ln(\text{natural gas futures})_{t-1}$           |                     |                     |                     |                     |                     |                     |                     | -0.0374<br>(0.0187) |                     |
| $\Delta \ln(\text{CDS spread})_{t-1}$                    | 0.0964<br>(0.0217)  | 0.1558<br>(0.0216)  | 0.1197<br>(0.0216)  | 0.0706<br>(0.0214)  |                     | 0.0903<br>(0.0227)  | 0.0962<br>(0.0217)  | 0.0682<br>(0.0208)  | 0.0512<br>(0.0215)  |
| AIC                                                      | -4.876              | -4.015              | -4.798              | -5.097              | -4.885              | -4.055              | -4.405              | -4.57               | -5.009              |

All coefficients are significant at least at 5% significance level.

Table F5: The coefficients of ARDL models for companies 37–45 listed in Table A1.

| Variable                                                 | 37                  | 38                  | 39                  | 40                  | 41                  | 42                  | 43                  | 44                  | 45                  |
|----------------------------------------------------------|---------------------|---------------------|---------------------|---------------------|---------------------|---------------------|---------------------|---------------------|---------------------|
| $\Delta \ln(\text{market capitalisation})_{t-1}$         |                     |                     | -0.1518<br>(0.0364) | -0.1352<br>(0.0315) |                     | -0.268<br>(0.0542)  |                     | -0.0854<br>(0.0334) | -0.0561<br>(0.0279) |
| $\Delta \ln(\text{STOXX 50})_{t-1}$                      | -0.345<br>(0.0488)  | -0.3165<br>(0.0685) |                     | -0.3568<br>(0.0946) | -0.2406<br>(0.0388) |                     |                     | -0.2153<br>(0.0543) | -0.1538<br>(0.0435) |
| $\Delta \ln(\text{volatility index for STOXX 50})_{t-1}$ |                     |                     | 0.0319<br>(0.0115)  |                     |                     |                     |                     |                     |                     |
| $\Delta(\text{3-month LIBOR for EUR})_{t-1}$             |                     |                     |                     |                     | 0.1884<br>(0.0817)  |                     |                     |                     |                     |
| $\Delta \ln(\text{3-month LIBOR for USD})_{t-1}$         |                     |                     |                     |                     |                     | -0.2475<br>(0.0874) |                     |                     | 0.1092<br>(0.0538)  |
| $\Delta \ln(\text{3-month LIBOR for GBP})_{t-1}$         |                     |                     |                     |                     |                     |                     |                     |                     |                     |
| $\Delta \ln(\text{EUR/USD exchange rate})_{t-1}$         | -0.468<br>(0.0826)  | -0.9842<br>(0.1508) | -0.8143<br>(0.1243) | -0.5331<br>(0.1569) | -0.4887<br>(0.0842) | -0.5453<br>(0.1215) |                     | -0.2793<br>(0.0816) | -0.2805<br>(0.0723) |
| $\Delta \ln(\text{EUR/GBP exchange rate})_{t-1}$         |                     | 0.5452<br>(0.167)   | 0.3239<br>(0.1324)  |                     | 0.2891<br>(0.0946)  |                     |                     |                     |                     |
| $\Delta \ln(\text{EUR/CNY exchange rate})_{t-1}$         |                     |                     |                     |                     |                     |                     | -0.4348<br>(0.2077) |                     |                     |
| $\Delta(\text{German 10-year bond yield})_{t-1}$         | -0.0297<br>(0.0126) |                     | -0.0351<br>(0.0159) | -0.0851<br>(0.0237) |                     | -0.0581<br>(0.0183) | -0.0776<br>(0.0384) |                     |                     |
| $\Delta(\text{French 10-year bond yield})_{t-1}$         |                     |                     |                     |                     |                     |                     | 0.0868<br>(0.0376)  |                     |                     |
| $\Delta \ln(\text{Italian 10-year bond yield})_{t-1}$    | 0.0452<br>(0.0206)  |                     | 0.0822<br>(0.0259)  | 0.1239<br>(0.0393)  |                     | 0.1157<br>(0.0309)  |                     | 0.0411<br>(0.0203)  |                     |
| $\Delta \ln(\text{gold futures})_{t-1}$                  |                     | 0.1514<br>(0.0594)  |                     |                     |                     |                     |                     |                     |                     |
| $\Delta \ln(\text{Brent crude oil futures})_{t-1}$       |                     |                     | -0.0828<br>(0.0329) |                     |                     |                     |                     | -0.0566<br>(0.0258) | -0.0516<br>(0.0228) |
| $\Delta \ln(\text{natural gas futures})_{t-1}$           |                     |                     |                     |                     |                     |                     |                     |                     |                     |
| $\Delta \ln(\text{CDS spread})_{t-1}$                    | -0.0881<br>(0.0211) |                     |                     | 0.1318<br>(0.0214)  |                     | 0.0834<br>(0.0233)  |                     |                     |                     |
| AIC                                                      | -4.801              | -3.811              | -4.269              | -3.525              | -4.947              | -4.024              | -2.945              | -4.757              | -5.001              |

All coefficients are significant at least at 5% significance level.

Table F6: The coefficients of ARDL models for companies 46–54 listed in Table A1.

| Variable                                                 | 46                  | 47                  | 48                  | 49                  | 50                  | 51                  | 52                  | 53                  | 54                  |
|----------------------------------------------------------|---------------------|---------------------|---------------------|---------------------|---------------------|---------------------|---------------------|---------------------|---------------------|
| $\Delta \ln(\text{market capitalisation})_{t-1}$         |                     | -0.2255<br>(0.0286) | -0.2414<br>(0.0262) | -0.1788<br>(0.0273) | -0.1065<br>(0.0344) |                     | -0.2263<br>(0.0397) | -0.1387<br>(0.0251) |                     |
| $\Delta \ln(\text{STOXX 50})_{t-1}$                      | -0.1508<br>(0.0414) |                     |                     |                     |                     | -0.2977<br>(0.0543) |                     | -0.1664<br>(0.0636) | -0.273<br>(0.0753)  |
| $\Delta \ln(\text{volatility index for STOXX 50})_{t-1}$ |                     |                     | 0.0235<br>(0.0111)  |                     |                     |                     | 0.0279<br>(0.0119)  | 0.0247<br>(0.0116)  |                     |
| $\Delta(\text{3-month LIBOR for EUR})_{t-1}$             |                     |                     |                     |                     |                     |                     |                     |                     |                     |
| $\Delta \ln(\text{3-month LIBOR for USD})_{t-1}$         |                     |                     |                     |                     | -0.2102<br>(0.089)  |                     | -0.1927<br>(0.0779) |                     |                     |
| $\Delta \ln(\text{3-month LIBOR for GBP})_{t-1}$         |                     |                     |                     |                     |                     |                     |                     |                     |                     |
| $\Delta \ln(\text{EUR/USD exchange rate})_{t-1}$         | -0.2667<br>(0.073)  |                     |                     |                     | -0.4492<br>(0.1235) |                     | -0.5793<br>(0.1058) |                     |                     |
| $\Delta \ln(\text{EUR/GBP exchange rate})_{t-1}$         |                     |                     |                     |                     |                     | 0.3276<br>(0.1256)  |                     |                     |                     |
| $\Delta \ln(\text{EUR/CNY exchange rate})_{t-1}$         |                     | -0.3287<br>(0.0961) | -0.5596<br>(0.1019) |                     |                     | -0.6848<br>(0.1119) |                     | -0.2213<br>(0.0918) | -0.8551<br>(0.1464) |
| $\Delta(\text{German 10-year bond yield})_{t-1}$         |                     |                     |                     |                     | -0.0459<br>(0.0185) |                     |                     |                     |                     |
| $\Delta(\text{French 10-year bond yield})_{t-1}$         |                     | -0.0328<br>(0.0144) |                     |                     |                     |                     |                     |                     |                     |
| $\Delta \ln(\text{Italian 10-year bond yield})_{t-1}$    |                     | 0.0597<br>(0.0245)  | 0.0642<br>(0.0253)  |                     | 0.1329<br>(0.0309)  | 0.0678<br>(0.0244)  |                     |                     |                     |
| $\Delta \ln(\text{gold futures})_{t-1}$                  |                     | 0.1059<br>(0.0431)  |                     |                     |                     |                     |                     | 0.0975<br>(0.0411)  | 0.171<br>(0.066)    |
| $\Delta \ln(\text{Brent crude oil futures})_{t-1}$       | -0.0529<br>(0.0229) | -0.1208<br>(0.0299) |                     | -0.0562<br>(0.0226) |                     |                     | -0.0695<br>(0.0328) | -0.0597<br>(0.0286) |                     |
| $\Delta \ln(\text{natural gas futures})_{t-1}$           |                     |                     |                     |                     |                     |                     |                     |                     |                     |
| $\Delta \ln(\text{CDS spread})_{t-1}$                    | 0.0456<br>(0.0222)  |                     | 0.0658<br>(0.0211)  | 0.096<br>(0.0211)   |                     |                     | 0.0703<br>(0.0221)  |                     |                     |
| AIC                                                      | -4.992              | -4.463              | -4.313              | -4.98               | -3.982              | -4.387              | -4.26               | -4.552              | -3.588              |

All coefficients are significant at least at 5% significance level.

Table F7: The coefficients of ARDL models for companies 55–63 listed in Table A1.

| Variable                                                 | 55                  | 56                  | 57                  | 58                  | 59                  | 60                  | 61                  | 62                  | 63                  |
|----------------------------------------------------------|---------------------|---------------------|---------------------|---------------------|---------------------|---------------------|---------------------|---------------------|---------------------|
| $\Delta \ln(\text{market capitalisation})_{t-1}$         |                     |                     | -0.3182<br>(0.0253) | -0.0934<br>(0.0381) | -0.1258<br>(0.0398) | -0.1147<br>(0.0311) | -0.2075<br>(0.0286) | -0.2284<br>(0.0445) |                     |
| $\Delta \ln(\text{STOXX 50})_{t-1}$                      | -0.282<br>(0.0701)  | -0.2573<br>(0.0469) |                     | -0.1558<br>(0.0569) | -0.1506<br>(0.0481) | -0.142<br>(0.0462)  |                     |                     | -0.1755<br>(0.0422) |
| $\Delta \ln(\text{volatility index for STOXX 50})_{t-1}$ |                     | -0.017<br>(0.0085)  |                     |                     |                     |                     |                     |                     |                     |
| $\Delta(\text{3-month LIBOR for EUR})_{t-1}$             |                     |                     | -0.3247<br>(0.1243) |                     |                     |                     |                     |                     |                     |
| $\Delta \ln(\text{3-month LIBOR for USD})_{t-1}$         | -0.282<br>(0.0859)  | 0.2038<br>(0.0494)  |                     | -0.1521<br>(0.0554) |                     |                     | -0.169<br>(0.0728)  | -0.3317<br>(0.0883) |                     |
| $\Delta \ln(\text{3-month LIBOR for GBP})_{t-1}$         |                     |                     |                     |                     |                     |                     |                     |                     |                     |
| $\Delta \ln(\text{EUR/USD exchange rate})_{t-1}$         | -0.7518<br>(0.1198) | -0.2261<br>(0.0706) |                     | -0.2808<br>(0.0776) | -0.373<br>(0.0752)  |                     | -0.4188<br>(0.0981) | -0.453<br>(0.1227)  |                     |
| $\Delta \ln(\text{EUR/GBP exchange rate})_{t-1}$         |                     |                     |                     |                     |                     |                     |                     |                     |                     |
| $\Delta \ln(\text{EUR/CNY exchange rate})_{t-1}$         |                     |                     |                     |                     |                     | -0.2841<br>(0.0709) |                     |                     | -0.1969<br>(0.0793) |
| $\Delta(\text{German 10-year bond yield})_{t-1}$         | -0.076<br>(0.018)   | -0.0349<br>(0.0101) | -0.0361<br>(0.0156) | -0.0434<br>(0.0117) |                     | -0.0424<br>(0.0143) |                     | -0.038<br>(0.0182)  |                     |
| $\Delta(\text{French 10-year bond yield})_{t-1}$         |                     |                     |                     |                     |                     | 0.0327<br>(0.014)   |                     |                     |                     |
| $\Delta \ln(\text{Italian 10-year bond yield})_{t-1}$    | 0.1353<br>(0.0298)  |                     | 0.0686<br>(0.027)   | 0.0772<br>(0.0193)  | 0.0755<br>(0.0187)  | 0.0479<br>(0.0189)  |                     | 0.1173<br>(0.0295)  |                     |
| $\Delta \ln(\text{gold futures})_{t-1}$                  |                     | 0.0908<br>(0.0306)  |                     |                     |                     |                     |                     |                     |                     |
| $\Delta \ln(\text{Brent crude oil futures})_{t-1}$       |                     | -0.054<br>(0.0211)  |                     | -0.0557<br>(0.0235) | -0.0519<br>(0.0237) | -0.0662<br>(0.0214) | -0.0802<br>(0.0306) | -0.1427<br>(0.0391) | -0.0503<br>(0.0249) |
| $\Delta \ln(\text{natural gas futures})_{t-1}$           |                     |                     |                     |                     |                     |                     |                     |                     |                     |
| $\Delta \ln(\text{CDS spread})_{t-1}$                    |                     | -0.0708<br>(0.0208) |                     | 0.0776<br>(0.0218)  |                     | 0.0421<br>(0.0213)  | 0.1126<br>(0.022)   | 0.078<br>(0.0219)   |                     |
| AIC                                                      | -4.055              | -5.173              | -4.107              | -4.946              | -4.921              | -5.124              | -4.393              | -4.007              | -4.812              |

All coefficients are significant at least at 5% significance level.

Table F8: The coefficients of ARDL models for companies 64–72 listed in Table A1.

| Variable                                                 | 64                  | 65                  | 66                  | 67                  | 68                  | 69                  | 70                  | 71                  | 72                  |
|----------------------------------------------------------|---------------------|---------------------|---------------------|---------------------|---------------------|---------------------|---------------------|---------------------|---------------------|
| $\Delta \ln(\text{market capitalisation})_{t-1}$         | -0.0583<br>(0.0209) | -0.0876<br>(0.0404) |                     |                     | -0.2695<br>(0.0328) | -0.1096<br>(0.0368) |                     | -0.1309<br>(0.0322) | -0.0966<br>(0.0295) |
| $\Delta \ln(\text{STOXX 50})_{t-1}$                      | -0.1521<br>(0.0318) | -0.1875<br>(0.0535) |                     | -0.3176<br>(0.0809) |                     | -0.198<br>(0.0596)  | -0.157<br>(0.0485)  | -0.1982<br>(0.0604) |                     |
| $\Delta \ln(\text{volatility index for STOXX 50})_{t-1}$ |                     |                     |                     |                     |                     |                     |                     |                     |                     |
| $\Delta(\text{3-month LIBOR for EUR})_{t-1}$             |                     |                     |                     |                     |                     |                     |                     |                     |                     |
| $\Delta \ln(\text{3-month LIBOR for USD})_{t-1}$         |                     |                     |                     | -0.3173<br>(0.099)  |                     |                     |                     | -0.1606<br>(0.0659) | -0.1627<br>(0.0749) |
| $\Delta \ln(\text{3-month LIBOR for GBP})_{t-1}$         |                     |                     |                     |                     |                     |                     |                     |                     |                     |
| $\Delta \ln(\text{EUR/USD exchange rate})_{t-1}$         | -0.3091<br>(0.0581) | -0.3484<br>(0.0724) |                     | -1.1439<br>(0.1542) |                     |                     | -0.4384<br>(0.0813) | -0.552<br>(0.1036)  |                     |
| $\Delta \ln(\text{EUR/GBP exchange rate})_{t-1}$         |                     |                     |                     | 0.463<br>(0.1695)   |                     |                     |                     | 0.3062<br>(0.1136)  |                     |
| $\Delta \ln(\text{EUR/CNY exchange rate})_{t-1}$         |                     |                     | -0.1076<br>(0.0546) |                     | -0.3436<br>(0.0713) | -0.5486<br>(0.0884) |                     |                     | -0.3231<br>(0.1)    |
| $\Delta(\text{German 10-year bond yield})_{t-1}$         |                     |                     |                     |                     | -0.0196<br>(0.0099) |                     | -0.0333<br>(0.0121) |                     |                     |
| $\Delta(\text{French 10-year bond yield})_{t-1}$         |                     | -0.0247<br>(0.011)  |                     |                     |                     |                     |                     |                     |                     |
| $\Delta \ln(\text{Italian 10-year bond yield})_{t-1}$    |                     | 0.0634<br>(0.0198)  |                     | 0.0996<br>(0.0337)  |                     | 0.0746<br>(0.022)   | 0.0528<br>(0.0197)  | 0.0837<br>(0.0222)  | 0.0711<br>(0.0237)  |
| $\Delta \ln(\text{gold futures})_{t-1}$                  |                     |                     |                     | 0.1504<br>(0.0606)  |                     |                     | 0.119<br>(0.0352)   | 0.0978<br>(0.0405)  |                     |
| $\Delta \ln(\text{Brent crude oil futures})_{t-1}$       | -0.0376<br>(0.0183) | -0.0453<br>(0.0227) |                     |                     |                     | -0.1081<br>(0.028)  | -0.1052<br>(0.0243) | -0.0839<br>(0.0283) |                     |
| $\Delta \ln(\text{natural gas futures})_{t-1}$           |                     |                     |                     |                     |                     |                     |                     |                     |                     |
| $\Delta \ln(\text{CDS spread})_{t-1}$                    |                     |                     | -0.0795<br>(0.0206) | 0.0829<br>(0.0233)  | -0.1436<br>(0.0208) |                     | 0.1449<br>(0.0213)  | 0.0638<br>(0.0223)  |                     |
| AIC                                                      | -5.442              | -5.017              | -5.538              | -3.78               | -5.084              | -4.596              | -4.889              | -4.592              | -4.328              |

All coefficients are significant at least at 5% significance level.

Table F9: The coefficients of ARDL models for companies 73–81 listed in Table A1.

| Variable                                                 | 73                  | 74                  | 75                  | 76                  | 77                  | 78                  | 79                  | 80                  | 81                  |
|----------------------------------------------------------|---------------------|---------------------|---------------------|---------------------|---------------------|---------------------|---------------------|---------------------|---------------------|
| $\Delta \ln(\text{market capitalisation})_{t-1}$         |                     |                     | -0.0891<br>(0.0222) |                     |                     |                     | -0.1228<br>(0.0376) | -0.0768<br>(0.0326) | -0.2521<br>(0.03)   |
| $\Delta \ln(\text{STOXX 50})_{t-1}$                      |                     | -0.2947<br>(0.0642) | -0.208<br>(0.039)   | -0.4662<br>(0.0657) | -0.2122<br>(0.0484) | -0.1585<br>(0.0441) |                     | -0.1228<br>(0.0507) |                     |
| $\Delta \ln(\text{volatility index for STOXX 50})_{t-1}$ |                     |                     |                     |                     |                     |                     |                     | 0.0182<br>(0.0088)  |                     |
| $\Delta(\text{3-month LIBOR for EUR})_{t-1}$             |                     |                     |                     |                     |                     |                     |                     |                     |                     |
| $\Delta \ln(\text{3-month LIBOR for USD})_{t-1}$         |                     | -0.1866<br>(0.077)  |                     | -0.2341<br>(0.0824) | -0.2164<br>(0.0581) |                     | -0.1934<br>(0.0575) |                     |                     |
| $\Delta \ln(\text{3-month LIBOR for GBP})_{t-1}$         |                     |                     |                     |                     |                     |                     |                     |                     |                     |
| $\Delta \ln(\text{EUR/USD exchange rate})_{t-1}$         |                     | -0.6152<br>(0.1072) |                     | -0.7187<br>(0.1114) | -0.3304<br>(0.0818) | -0.2396<br>(0.0852) | -0.2148<br>(0.0819) | -0.4054<br>(0.069)  | -0.4273<br>(0.1072) |
| $\Delta \ln(\text{EUR/GBP exchange rate})_{t-1}$         |                     |                     |                     |                     |                     | 0.1934<br>(0.0904)  |                     |                     |                     |
| $\Delta \ln(\text{EUR/CNY exchange rate})_{t-1}$         |                     |                     | -0.2253<br>(0.0637) |                     |                     |                     |                     |                     |                     |
| $\Delta(\text{German 10-year bond yield})_{t-1}$         | -0.0384<br>(0.0106) | -0.052<br>(0.0165)  |                     |                     | -0.0356<br>(0.0122) | -0.0356<br>(0.0111) | -0.0327<br>(0.0115) |                     |                     |
| $\Delta(\text{French 10-year bond yield})_{t-1}$         |                     |                     |                     | -0.083<br>(0.017)   |                     |                     |                     |                     |                     |
| $\Delta \ln(\text{Italian 10-year bond yield})_{t-1}$    |                     | 0.114<br>(0.0276)   | 0.0361<br>(0.0161)  | 0.1453<br>(0.0312)  | 0.0564<br>(0.0202)  | 0.0516<br>(0.0182)  | 0.075<br>(0.0187)   |                     |                     |
| $\Delta \ln(\text{gold futures})_{t-1}$                  |                     |                     |                     |                     |                     | 0.068<br>(0.0325)   | 0.0901<br>(0.0357)  |                     |                     |
| $\Delta \ln(\text{Brent crude oil futures})_{t-1}$       | -0.0737<br>(0.0236) |                     |                     |                     | -0.0716<br>(0.0248) | -0.0626<br>(0.0225) | -0.0823<br>(0.0244) |                     | -0.1417<br>(0.0339) |
| $\Delta \ln(\text{natural gas futures})_{t-1}$           |                     |                     |                     |                     |                     |                     |                     |                     |                     |
| $\Delta \ln(\text{CDS spread})_{t-1}$                    | 0.0825<br>(0.0206)  | 0.0677<br>(0.0228)  | 0.0576<br>(0.0216)  | 0.0484<br>(0.022)   |                     |                     |                     | -0.0323<br>(0.0216) |                     |
| AIC                                                      | -4.877              | -4.28               | -5.23               | -4.145              | -4.837              | -5.047              | -4.86               | -5.085              | -4.217              |

All coefficients are significant at least at 5% significance level.

Table F10: The coefficients of ARDL models for companies 82–90 listed in Table A1.

| Variable                                                 | 82                  | 83                  | 84                  | 85                  | 86                  | 87                  | 88                  | 89                  | 90                  |
|----------------------------------------------------------|---------------------|---------------------|---------------------|---------------------|---------------------|---------------------|---------------------|---------------------|---------------------|
| $\Delta \ln(\text{market capitalisation})_{t-1}$         | -0.0853<br>(0.0212) | -0.0756<br>(0.0273) | -0.1298<br>(0.0372) | -0.0801<br>(0.0281) | -0.2059<br>(0.0309) | -0.178<br>(0.0327)  | -0.5174<br>(0.0443) | -0.1413<br>(0.035)  | -0.164<br>(0.0369)  |
| $\Delta \ln(\text{STOXX 50})_{t-1}$                      | -0.3776<br>(0.0631) |                     | -0.2296<br>(0.0801) |                     | -0.1136<br>(0.0574) |                     | 0.2894<br>(0.0825)  | -0.1368<br>(0.0627) |                     |
| $\Delta \ln(\text{volatility index for STOXX 50})_{t-1}$ |                     |                     | 0.0315<br>(0.0131)  | 0.0234<br>(0.0104)  |                     | 0.0177<br>(0.0086)  |                     |                     | 0.0288<br>(0.011)   |
| $\Delta(\text{3-month LIBOR for EUR})_{t-1}$             |                     |                     |                     |                     |                     |                     |                     |                     |                     |
| $\Delta \ln(\text{3-month LIBOR for USD})_{t-1}$         |                     |                     | -0.2127<br>(0.0765) |                     |                     |                     |                     |                     | -0.1477<br>(0.0741) |
| $\Delta \ln(\text{3-month LIBOR for GBP})_{t-1}$         |                     |                     |                     |                     |                     |                     |                     |                     |                     |
| $\Delta \ln(\text{EUR/USD exchange rate})_{t-1}$         | -0.65<br>(0.1171)   | -0.4407<br>(0.139)  | -0.7389<br>(0.1206) | -0.4469<br>(0.0961) | -0.3816<br>(0.0875) |                     | -0.7662<br>(0.1229) | -0.3484<br>(0.0935) | -0.3919<br>(0.1017) |
| $\Delta \ln(\text{EUR/GBP exchange rate})_{t-1}$         | 0.2564<br>(0.1284)  |                     | 0.63<br>(0.1317)    |                     |                     | 0.1963<br>(0.0973)  |                     |                     |                     |
| $\Delta \ln(\text{EUR/CNY exchange rate})_{t-1}$         |                     |                     |                     |                     |                     | -0.4235<br>(0.0893) |                     |                     |                     |
| $\Delta(\text{German 10-year bond yield})_{t-1}$         |                     | -0.0571<br>(0.0214) |                     |                     | -0.0271<br>(0.0132) |                     |                     | -0.0347<br>(0.0141) |                     |
| $\Delta(\text{French 10-year bond yield})_{t-1}$         |                     |                     |                     |                     |                     |                     |                     |                     | -0.0353<br>(0.0151) |
| $\Delta \ln(\text{Italian 10-year bond yield})_{t-1}$    | 0.0529<br>(0.0250)  | 0.1643<br>(0.0361)  | 0.1015<br>(0.0257)  |                     | 0.0643<br>(0.0218)  | 0.0696<br>(0.0186)  | 0.0816<br>(0.0309)  | 0.0488<br>(0.023)   | 0.1162<br>(0.0267)  |
| $\Delta \ln(\text{gold futures})_{t-1}$                  | 0.1459<br>(0.0457)  |                     | 0.1279<br>(0.047)   |                     |                     |                     |                     |                     |                     |
| $\Delta \ln(\text{Brent crude oil futures})_{t-1}$       | -0.0681<br>(0.0319) |                     | -0.0801<br>(0.0327) | -0.079<br>(0.0297)  | -0.0922<br>(0.0264) | -0.0697<br>(0.0239) |                     | -0.0788<br>(0.0284) | -0.0786<br>(0.0313) |
| $\Delta \ln(\text{natural gas futures})_{t-1}$           |                     |                     |                     |                     | -0.0376<br>(0.0174) |                     |                     |                     |                     |
| $\Delta \ln(\text{CDS spread})_{t-1}$                    | -0.0483<br>(0.022)  | 0.1225<br>(0.0235)  | -0.0831<br>(0.0216) | 0.0639<br>(0.0228)  | 0.0869<br>(0.021)   |                     |                     |                     | 0.0996<br>(0.0225)  |
| AIC                                                      | -4.346              | -3.747              | -4.295              | -4.452              | -4.71               | -4.888              | -3.915              | -4.57               | -4.364              |

All coefficients are significant at least at 5% significance level.
